# Supplementary material for: USP22 as a key regulator of glycolysis pathway in osteosarcoma: insights from bioinformatics and experimental approaches
Source: PeerJ. 2024 May 20;12:e17397. doi: 10.7717/peerj.17397 (PMC11114114; doi:10.7717/peerj.17397)
Supplement: Supplemental Information 1 — Comparison of the DEGs from TCGA-OS cohort and hub genes from GSE16088 dataset, 344 common genes were obtained. [file peerj-12-17397-s001.xlsx]

## Sheet: Sheet1
GSE16088	TCGA	Common genes
COL5A2	ADSL	ADSL
COL1A2	AEBP1	AEBP1
ASCL3	AHSA1	AHSA1
SEMA4A	AIMP1	AIMP1
XPOT	ALDH18A1	ALDH18A1
C2orf72	ALDOA	ALDOA
TARS	ALG8	ALG8
MEFV	ANAPC5	ANAPC5
COL1A1	ANP32A	ANP32A
LOC101929842 /// PGA3 /// PGA4 /// PGA5	APTX	APTX
SFTPA1 /// SFTPA2	ARMC6	ARMC6
SKAP1	ATP6V0B	ATP6V0B
GJA1	ATP6V0E2	ATP6V0E2
CCL25	ATRAID	ATRAID
RP11-10N23.4	AURKAIP1	AURKAIP1
SERPINB3 /// SERPINB4	BANF1	BANF1
SCN10A	BCAP31	BCAP31
CD80	BTBD1	BTBD1
HIST1H4I	BTF3	BTF3
TXNDC9	C1QBP	C1QBP
FGF6	CALD1	CALD1
RAB31	CCDC71	CCDC71
CCR4	CCNH	CCNH
SFRP5	CCT2	CCT2
C1orf186 /// LOC100505650 /// LOC101929219	CCT4	CCT4
DNAH2	CCT5	CCT5
CNGA1	CCT7	CCT7
SCGB1A1	CDC123	CDC123
PSG4	CDC27	CDC27
PRSS3P3	CDK5RAP3	CDK5RAP3
GUCY1B2	CEBPG	CEBPG
ASH1L	CHCHD3	CHCHD3
FXYD3	CHMP2A	CHMP2A
P2RX5-TAX1BP3 /// TAX1BP3	CKS2	CKS2
DYNLL1	CNBP	CNBP
MASP1	CNPY2	CNPY2
CP	COL3A1	COL3A1
TRA@ /// YME1L1	COL5A1	COL5A1
STAB2	COL6A2	COL6A2
C1orf61	COL6A3	COL6A3
TUBA1A	COPA	COPA
DOC2B	COPS3	COPS3
CKS2	COPZ1	COPZ1
PLCB2	COX5A	COX5A
SEC61G	COX6B1	COX6B1
DNAH6	COX6C	COX6C
GDPD2	COX7A2	COX7A2
FKBP3	COX7B	COX7B
SOX10	CSE1L	CSE1L
FGF16	DAZAP1	DAZAP1
LGALS14	DCAF16	DCAF16
ANKRD55	DCXR	DCXR
REM1	DGUOK	DGUOK
GPR182	DNAJC7	DNAJC7
ALOX15B	DOHH	DOHH
KPNA2	DYNLL1	DYNLL1
YWHAQ	E2F4	E2F4
PPP2R2B	ECHS1	ECHS1
FAM155B	EDF1	EDF1
HAT1	EEF1E1	EEF1E1
TMX1	EGFR	EGFR
NIPAL2	EIF2B1	EIF2B1
EDN3	EIF2S2	EIF2S2
NMNAT2	EIF3B	EIF3B
RENBP	EIF3D	EIF3D
SH3BP1	EIF3E	EIF3E
CNR2	EIF3H	EIF3H
KIR2DL2	EIF3I	EIF3I
SLC6A13	EIF3J	EIF3J
CACNG4	EIF3M	EIF3M
HTR3B	ELAVL1	ELAVL1
BRD7P3	EMC8	EMC8
FGF23	ENY2	ENY2
YTHDF2	ESRRA	ESRRA
FOXN3-AS2	EWSR1	EWSR1
FUBP3	FAM50A	FAM50A
GOLT1B	FBL	FBL
TAAR5	FUZ	FUZ
GOLGA4	GABARAPL2	GABARAPL2
KRT76	GAPDH	GAPDH
PPP1R8	GAR1	GAR1
PSMD14	GEMIN7	GEMIN7
FLOT2	GGCT	GGCT
PP13	GNAI1	GNAI1
ZNF747	GPI	GPI
HTR3A	GPN3	GPN3
TNF	GTF2A2	GTF2A2
LINC00652	GTF3A	GTF3A
CDH1	GTPBP4	GTPBP4
DEFB4A /// DEFB4B	HAGH	HAGH
CASP10	HDAC2	HDAC2
GEMIN7	HMGN3	HMGN3
MYOG	HNRNPA1	HNRNPA1
HIST1H2BL	HNRNPA2B1	HNRNPA2B1
CNTD2	HNRNPAB	HNRNPAB
CCL16	HNRNPC	HNRNPC
SAMD4B	HNRNPD	HNRNPD
GPR52	HOXC8	HOXC8
SYT13	HPRT1	HPRT1
E2F4	HRAS	HRAS
SFTPC	HSD17B8	HSD17B8
Igk	HSPA4	HSPA4
MLXIPL	HSPA9	HSPA9
KCNA2	HSPB6	HSPB6
LINC00216	HSPD1	HSPD1
BEST2	HSPE1	HSPE1
MAST1	ID3	ID3
CLCA1	IMPDH2	IMPDH2
RAD23B	INTS8	INTS8
KIR2DL4	ITGB1BP1	ITGB1BP1
SIGLEC5	LAMB1	LAMB1
MAP3K19	LAMTOR5	LAMTOR5
CDX2	LAP3	LAP3
SPINT3	LDHB	LDHB
NPY5R	LIMA1	LIMA1
BCAN	LOXL1	LOXL1
LOC101929726	LRPPRC	LRPPRC
UPK1A	LRRC23	LRRC23
CAMK2A	LSM14A	LSM14A
CYSLTR2	LSM2	LSM2
PIGR	LSM7	LSM7
OR1E3 /// OR1E3	LSM8	LSM8
IFNA1 /// IFNA13	LYRM4	LYRM4
RGS14	MACROD1	MACROD1
RASGRF1	MAD2L1	MAD2L1
FOXN1	MAP3K14	MAP3K14
HSPE1-MOB4 /// MOB4	MCM7	MCM7
CA14	MED28	MED28
CTNNB1	MFSD10	MFSD10
B3GNT4	MRPL13	MRPL13
CEACAM1	MRPL15	MRPL15
KIR2DL5A	MRPL18	MRPL18
CLPS	MRPL22	MRPL22
OR10H3	MRPL42	MRPL42
LIME1	MRPL9	MRPL9
YBX2	MRPS15	MRPS15
OLFML2B	MRPS2	MRPS2
NOTCH2NL	MRPS35	MRPS35
GPATCH4	MRTO4	MRTO4
ETFA	MTERF3	MTERF3
OR5I1	MTX1	MTX1
OVGP1	MTX2	MTX2
LYPD3	MVD	MVD
RND3	MXRA5	MXRA5
PRAMEF10	MYC	MYC
IGH /// IGHA2 /// IGHD /// IGHG1	MYL6B	MYL6B
CACNG2	NACA	NACA
IVL	NAE1	NAE1
PSMA4	NAP1L1	NAP1L1
ASB12 /// MTMR8	NCL	NCL
OR10J1	NDUFA8	NDUFA8
ZBTB32	NDUFAB1	NDUFAB1
INPP5J	NDUFB2	NDUFB2
HECW1	NDUFB3	NDUFB3
LHX3	NDUFB4	NDUFB4
PDIA3	NDUFB5	NDUFB5
RUNDC3A	NDUFS6	NDUFS6
OSBP2	NDUFV1	NDUFV1
LY9	NEDD8	NEDD8
HTR1D	NELFCD	NELFCD
KLF15	NGRN	NGRN
SRP72	NID2	NID2
GLRA2	NME1	NME1
ACRV1	NOL7	NOL7
PRSS1 /// PRSS2	NOP10	NOP10
S100A12	NPM1	NPM1
HIF3A	NSA2	NSA2
MGAT3	NUDT1	NUDT1
CEBPA-AS1	NUP37	NUP37
CCBL1	NUP43	NUP43
NCR2	OAZ1	OAZ1
C11orf16	ODC1	ODC1
CCKAR	PA2G4	PA2G4
GRIN1	PAICS	PAICS
FCF1 /// MAPK1IP1L	PAK1IP1	PAK1IP1
ARMCX3	PARK7	PARK7
TNK1	PCBD1	PCBD1
TRPV5	PCMT1	PCMT1
ERICH1	PDCD5	PDCD5
LRRC20	PEF1	PEF1
MFNG	PEPD	PEPD
NAT2	PFDN4	PFDN4
RBPJ	PFDN5	PFDN5
CD63	PMPCB	PMPCB
TMEM63A	PNPLA2	PNPLA2
TCRA /// TRAV8-6 /// TRAV8-6	POLD2	POLD2
PIP	POLR2E	POLR2E
CDSN	POLR2G	POLR2G
GSK3A	POLR2H	POLR2H
TUBB4A	POP4	POP4
TUBB	POP5	POP5
SPTSSA	POSTN	POSTN
RLBP1	PPA1	PPA1
POMP	PPIH	PPIH
CSF2	PPP1CA	PPP1CA
INO80B	PPP1R14B	PPP1R14B
MARC1	PRDX1	PRDX1
KIAA0509	PRMT1	PRMT1
CCT3 /// LOC101927137	PSMA1	PSMA1
PPP2R5E	PSMA4	PSMA4
LDHA	PSMA5	PSMA5
PSG5	PSMA7	PSMA7
SLBP	PSMB1	PSMB1
SLC39A6	PSMB3	PSMB3
KRT2	PSMB4	PSMB4
TSHZ2	PSMB5	PSMB5
NPY6R	PSMB7	PSMB7
EMR1	PSMC5	PSMC5
KIR2DS2	PSMD1	PSMD1
PTCRA	PSMD11	PSMD11
PIK3C2G	PSMD13	PSMD13
LIPE	PSMD14	PSMD14
CHST4	PSMD3	PSMD3
RHOH	PSMD4	PSMD4
CD1B	PSMD6	PSMD6
OR7A5	PSMD8	PSMD8
TRPS1	PSMG1	PSMG1
MS4A5	PTDSS1	PTDSS1
NEU3	PTGES3	PTGES3
AHSP	PTMA	PTMA
RIN2	PTRH2	PTRH2
ADAM11	PTTG1	PTTG1
LAD1	PUF60	PUF60
DPP6	PWP1	PWP1
HNRNPH2 /// RPL36A-HNRNPH2	RABGGTB	RABGGTB
KSR1	RAD21	RAD21
MPP2	RAN	RAN
USP29	RASSF7	RASSF7
PLOD2	RBX1	RBX1
PCNA	RFXANK	RFXANK
CEACAM4	RPL10A	RPL10A
MYL7	RPL11	RPL11
C19orf73	RPL12	RPL12
PRB1	RPL22	RPL22
RGS16	RPL24	RPL24
BAIAP3	RPL26L1	RPL26L1
LOC100862671 /// SRCAP	RPL27A	RPL27A
PGLYRP4	RPL30	RPL30
QKI	RPL32	RPL32
PSG6	RPL34	RPL34
LHPP	RPL35	RPL35
FAM163A	RPL36	RPL36
RAB1A	RPL37	RPL37
SPRYD7	RPL39	RPL39
PNPLA2	RPL6	RPL6
ATP12A	RPL7	RPL7
CSE1L	RPL8	RPL8
C2orf83	RPL9	RPL9
TPO	RPLP2	RPLP2
KIR3DL3	RPS11	RPS11
FCRL2	RPS12	RPS12
PSD4	RPS15A	RPS15A
MYL10	RPS17	RPS17
HSP90AB1	RPS19	RPS19
CD5	RPS21	RPS21
CRYGEP	RPS23	RPS23
TBX5	RPS24	RPS24
GCNT4	RPS27A	RPS27A
ABCA6	RPS3	RPS3
NDUFS5 /// RPL10	RPS4X	RPS4X
RMND5B	RPS7	RPS7
TUBA1B	RSL24D1	RSL24D1
ZNF507	RUVBL2	RUVBL2
PRKCE	RWDD1	RWDD1
SETD5	SEC11A	SEC11A
OSGIN1	SERPINB6	SERPINB6
MYBPC3	SF3B5	SF3B5
GPRIN2	SLC25A10	SLC25A10
PDE1C	SLC25A6	SLC25A6
RNF122	SLC35B1	SLC35B1
HIP1R	SLC7A8	SLC7A8
SEZ6L	SLIRP	SLIRP
CSH1 /// CSHL1 /// GH1 /// GH2	SMAP1	SMAP1
NEUROD6	SNAI2	SNAI2
PNLIPRP1	SNF8	SNF8
HMGXB4	SNRPA1	SNRPA1
SNRPG	SNRPB	SNRPB
ADAP1	SNRPD1	SNRPD1
ESRP2 /// MIR6773	SNRPD2	SNRPD2
NR6A1	SNRPD3	SNRPD3
UNC119	SNRPE	SNRPE
WSCD2	SNRPF	SNRPF
LRRC47	SNRPG	SNRPG
UBE2V2	SQLE	SQLE
EFR3B	SRI	SRI
ARHGEF38	SRM	SRM
USP2	SRP14	SRP14
L1CAM	SRP19	SRP19
LOC100129361	SRSF3	SRSF3
KLK6	SRSF7	SRSF7
HIST1H3E	SSB	SSB
DPF1	SSBP1	SSBP1
IRX4	SSR2	SSR2
FLRT1	SSRP1	SSRP1
FEV	STOML2	STOML2
ADAM9	TAF12	TAF12
EPX	TALDO1	TALDO1
MISP	TARDBP	TARDBP
DGCR9	TBCA	TBCA
SSR1	TBCB	TBCB
OTOR	TBKBP1	TBKBP1
NNAT	TFB2M	TFB2M
ERVH-6	THOC7	THOC7
NME1-NME2 /// NME2	TIMM13	TIMM13
KRT75	TIMM17A	TIMM17A
CHRNB1	TIMM8B	TIMM8B
UBA2	TKT	TKT
KIR2DL1 /// KIR2DL2 /// KIR2DL3 /// KIR2DS1 /// KIR2DS2 /// KIR2DS4	TMEM14B	TMEM14B
CHSY1	TMEM258	TMEM258
OR7E156P	TMEM45A	TMEM45A
CCT6A	TPD52L2	TPD52L2
CCDC47	TPM4	TPM4
BCAS2	TPRKB	TPRKB
UBE2K	TRIAP1	TRIAP1
GABRR2	TRIT1	TRIT1
SLC5A5	TRMT112	TRMT112
HPSE2	TSPO	TSPO
GRIP2	TUBG1	TUBG1
HOXC11	TXN	TXN
MCUR1	UBA2	UBA2
PRDM14	UBE2C	UBE2C
NUDT7	UBE2N	UBE2N
CA7	UBL5	UBL5
TUBA1C	UFC1	UFC1
PSG2	UNG	UNG
TSSK1B	UQCR10	UQCR10
G6PC2	UQCRB	UQCRB
LOC100506603	UQCRC2	UQCRC2
LOC101930602 /// SLC14A2	URM1	URM1
OSBPL8	UTP6	UTP6
CAPN9	VDAC1	VDAC1
STAR	VDAC2	VDAC2
SRP19	VRK1	VRK1
TRAV8-3	WDR12	WDR12
USO1	WDR43	WDR43
AVPR1B	WDR61	WDR61
KCNQ3	WNT10B	WNT10B
ACTL8	YBX1	YBX1
LOC100131532	YIF1B	YIF1B
WNT1	YTHDF1	YTHDF1
CHODL	YWHAE	YWHAE
C1orf105	ZNF146	ZNF146
CELF3	ZNF302	ZNF302
COPS5	ZNHIT2	ZNHIT2
MPP3	AAAS
HSPA13	AAMDC
PMFBP1	AAMP
WAS	AATF
TXNL1	ABCB8
IL2RA	ABCF2
MRPL41	ABHD14A
GAR1	ABHD14B
PARK7	ABL1
SDC2	ACAD9
SNRPD3	ACAT1
KLK10	ACBD6
EIF4A3	ACOT8
RAN	ACTG1
MINK1	ACTR3B
TCN1	ACTR5
C22orf24	ADM
ONECUT2	ADPRHL2
DRD2	ADRM1
SRP54	AEN
CLSTN2	AFMID
SIGLEC7	AGBL5
SLC22A14	AGFG1
HLA-DOA	AHCY
ELSPBP1	AIFM1
REEP2	AK2
SPTBN5	AKAP1
RAC1	AKR1A1
HIST1H1E	AKR1B1
MCTS1	AL136454.1
DNAJA2	ALG1
TEX15	ALG3
FOXH1	ALKBH2
TRIM15	ALX1
KIR2DL1	ALYREF
KIAA1751	AMDHD2
C2orf27A	AMPH
SEC24B	ANAPC15
SYT2	ANAPC7
SLC4A1	ANKRD13B
MTHFD2	ANTKMT
PMEL	AOC3
ASIC4	AP3S2
TEX28	APEH
MAP3K10	APRT
SEC23A	ARF1
EPS8L1	ARF3
RSL24D1	ARF5
RNF208	ARL16
LOR	ARL2
DRP2	ARL4D
PDE1B	ARMC10
PIK3R2	ARMC7
SOX13	ARSJ
EIF1AX	ATAD3A
PRKAR1B	ATG4B
TRPM6	ATOX1
TBX21	ATP5F1B
CTD-2269F5.1	ATP5F1C
MRPL3	ATP5F1D
MADCAM1	ATP5F1E
RCN1	ATP5IF1
MTHFR	ATP5MC1
FUT7	ATP5MC2
FUT3	ATP5MC3
MMP25	ATP5MD
BMP15	ATP5ME
PRSS22	ATP5MF
MUC3A /// MUC3B	ATP5MG
HSPA5	ATP5MPL
PSG1	ATP5PB
AGAP2	ATP5PD
PAK3	ATP5PO
CYCS	ATP6V1F
PRDM11	AUP1
CDY1 /// CDY1B /// CDY2A /// CDY2B	B3GAT3
ST6GAL1	B4GALT7
VIPR1	B9D2
CD244	BABAM1
SPIB	BAG1
HHLA1	BAIAP2L1
SLC7A4	BAX
CRYGD	BCAT2
YWHAH	BCCIP
CADM3	BCL2L12
RPL26L1	BCS1L
PRDM12	BID
PARD6A	BLOC1S1
H2AFZ	BNIP1
CD6	BOLA3
MUC3B	BOP1
KRT6A /// KRT6B /// KRT6C	BRI3
DNASE1	BRMS1
AMHR2	BUD23
BMX	BUD31
FKBP8	C11orf49
SPARC	C12orf10
CRHR2	C12orf45
KIR2DS5	C18orf21
RASSF7	C19orf12
LOC102724788 /// PRODH	C19orf48
PI15	C1orf50
ALPP	C1RL
APBA1	C1S
PDIA6	C20orf27
PLAC4	C7orf50
CYAT1	CAPNS1
SPX	CARHSP1
CRYGB	CAVIN1
PRKRA	CCDC124
ATP2B2	CCDC137
COPS4	CCDC167
IL18BP	CCDC58
MYO1B	CCDC85B
GPR15	CCDC86
PSMD2	CCS
ATXN8OS	CCT3
GP2	CD151
LINC01314	CD320
ILF2	CD81
ADTRP	CDC25A
C6orf15	CDC34
GJA8	CDCA3
LAPTM4A	CDCA5
ADNP	CDK10
CELSR3	CDK2AP2
ACAP1	CDK5
SP4	CDKN2AIPNL
C1orf95	CEBPZOS
LPO	CENPH
REG1P	CENPM
IL25	CENPV
KRT85	CENPX
SLC6A5	CERS5
SOX15	CFAP36
CRLF2	CFL1
SPTBN2	CHCHD1
TTC3 /// TTC3P1	CHCHD5
BBC3 /// MIR3190 /// MIR3191	CHID1
C7orf69	CHML
CDH11	CHMP1A
TNFSF18	CHTF18
GRPR	CHTOP
OR1D2	CIAPIN1
CSF3	CIB1
BMP6	CISD1
MMP19	CISD3
PCSK6	CLN6
SMR3A /// SMR3B	CLPB
CTD-3126B10.1	CLTA
HSF4	CLTB
TMEM59L	CLUH
STRAP	CMSS1
VENTX	CNDP2
RP11-414H17.5	COA3
UBE2D4	COA4
IGHG1	COASY
RNF39	COL6A1
MTDH	COMMD4
CNIH1	COMMD6
SLC18A1	COMMD9
KCNC1	COMTD1
GFRA3	COPRS
PTAFR	COPS6
PSMB4	COPS7A
POU2F2	COPS7B
LRRC75B	COPS9
RCN2	COQ3
CALU	COQ8A
TAF11	COQ9
FIGF /// PIR-FIGF	COX14
MAS1	COX17
ADD2	COX4I1
KLF10	COX5B
ARMC6	COX6A1
YIF1B	COX7A2L
WNT8B	COX7C
RP11-114H24.6	COX8A
KRT1	CPSF3
DNASE1L2	CRIPT
KRTAP5-9	CRYBG1
BAAT	CS
LUZP4	CSNK2A2
KRT83	CSTF1
CD82	CTU2
CALML3	CUEDC2
POU3F1	CUTA
CACNA1I	CUTC
TIAM2	CWF19L1
CEACAM3	CXorf40A
CHRM5	CYB561D2
AKIP1 /// NUAK2	CYC1
TSKS	CYHR1
LRRC23 /// RPL13P5	CYSTM1
RAX	DACT1
INHBC	DALRD3
ZNRF4	DAXX
SEC31B	DBN1
GK-AS1 /// GK-AS1	DCTPP1
PPP6C	DDX19B
GAS8	DDX21
DSCAM	DDX28
HSPB6	DDX41
AC007967.3 /// RBMY2TP /// RBMY2TP	DDX49
CYP2A13	DDX51
EIF5	DDX54
SMCP	DDX55
GNG10	DENND2B
SH2D3C	DET1
EIF2S1	DHX33
DUOX2	DHX37
ZWINT	DKC1
PRTN3	DMAC1
SST	DNAAF5
CYP3A7 /// CYP3A7-CYP3AP1	DNAJA3
KCNC4	DNAJC19
TET3	DNAJC4
SMC1A	DNTTIP1
PRB3	DPCD
CDKL2	DPH2
TRIM29	DPH5
CST2	DPH7
BRD7	DPM2
CBX1	DPP3
BZW1	DPP7
FGFBP1	DPY30
SPRR2B	DSCC1
CLDN17	DTD1
PYHIN1	DTYMK
SNRPD1	DUS1L
DKKL1	DXO
SEMA7A	DYRK1B
LINC01260	EARS2
ARF4	EBNA1BP2
GPRC5D	EBPL
GUCA2A	ECI1
PRKD3	ECI2
GJD2	ECM2
SUMO1	EEF1A1
P2RX1	EEF1B2
AP2M1	EEF1D
AQP3	EEF2
COL5A1	EFNA1
IPO7	EFTUD2
PLS3	EIF2B3
SCGB1D2	EIF2B4
LTA	EIF2D
GPR162	EIF3C
KEL	EIF3CL
PQLC2	EIF3F
FAM83E	EIF3G
AVP	EIF3K
TRH	EIF4A1
BTNL3	EIF4B
FASLG	EIF4E2
ZNF146	EIF4EBP3
BPI /// LOC149684	EIF5A
FOXJ1	EIF6
C1QL1	EIPR1
TTTY1 /// TTTY1B	ELOB
TSPO2	ELOC
DLL3	EMC4
KALP /// KALP	EMD
HR	EME1
TCRA /// TCRA /// TRAV10 /// TRAV10 /// YME1L1	ENKD1
PRDM1	ENTR1
PDE6G	EPOP
ABCB9	ERAL1
DSCR4	ERBB2
PPP2CA	ERCC2
PCMT1	ERGIC3
EID1	ERI3
ZNF528	ERP29
VCY /// VCY1B	ETFB
AP1M2	ETV6
FAM98A	EXOC2
NME1	EXOSC1
GDF3	EXOSC2
GPR19	EXOSC4
TPSD1	EXOSC5
SEC11A	EXOSC7
KIR2DS3	FAAP24
NRD1	FABP3
DPY19L4	FAH
PSMC5	FAHD1
CYP3A7-CYP3AP1	FAHD2A
EMR3	FAHD2B
ECEL1	FAM136A
EPB42	FAM162A
EFCC1	FAM174A
HTR6	FAM174C
ENY2	FAM207A
FNDC3B /// LOC101928615	FAM216A
EMC2	FAM229B
GNL3 /// SNORD19B	FAM234A
CPA4	FARSB
PDYN	FAS
DZANK1	FASTKD5
RIC3	FAU
ARSF	FBXW11
CRTC1	FBXW5
FSTL4	FDFT1
SLC28A1	FH
FHIT	FIBP
CNOT7	FIS1
CFP	FKBP4
BCL2L14	FLAD1
MPL	FLNC
C15orf49	FMC1
HERC2 /// HERC2P10 /// LOC101929047 /// LOC101929832	FRG1
LAMB1	FTSJ3
ZNF550	FUNDC2
KIR3DL1 /// KIR3DL2	FUOM
UPK1B	FUS
TDG	FXYD1
FXR1	FXYD5
NXPE4	FZD1
SOX21	G6PC3
PRB4	GAL
PLA1A	GAS1
RAPGEF3	GATD1
MLN	GCSH
LOC101929597 /// TBCD	GEMIN5
SNAI2	GEMIN6
ZBTB7B	GFER
PFDN4	GFM2
TSPAN32	GFPT2
ALOX12P2	GINS2
NAA50	GLRX3
LMO1	GNAQ
PTPRT	GNB2
SERPINH1	GNL3
MAP1B	GNPDA1
HNRNPAB	GOT2
PDE6A	GPATCH3
TACR2	GPN1
KIR3DX1	GPR161
PHLDB1	GPS1
KCNB2	GPX1
SV2B	GRAMD1A
CGA	GRHPR
ATOH1	GRK6
CCL22	GRPEL1
PSMD13	GRSF1
CCR3	GRWD1
AGFG2	GSS
YTHDF3	GSTO1
ARFGAP3	GSTP1
ADRA2B	GTF3C6
DMTN	GTPBP6
INSL4	GUK1
LILRB3	GYG2
EPS8L3	H2AZ1
OR7E111P /// OR7E111P	HADHA
GFRA4	HARS1
EPB41L4A	HAX1
ADAMTS12	HDDC3
IQCA1	HIGD2A
C3orf36	HINT1
ZNF835	HINT2
ACTL6B	HMBS
PRKCQ	HMCN1
ACTL7A	HMGA1
MVK	HMOX2
CYP11B2	HNRNPA1L2
FRMPD1	HNRNPA1P48
RAB6A /// RAB6C /// WTH3DI	HOMER2
ZKSCAN3	HOXA9
OR1A1	HPCAL1
LONRF3	HPDL
TRIM62	HROB
C10orf95	HSD17B10
PHLPP2	HSPA8
YWHAB	HSPBP1
TSPY1	IDH2
PLA2G3	IDH3B
CIDEC	IDH3G
TP63	IFRD2
TM6SF2	IGF1R
ERCC4	IGFBP3
CTRB2	IMP3
PSMC6	IMP4
CNOT2	IMPDH1
RASL10A	ING4
TNFSF8	INSIG1
CMC4 /// MTCP1	INTS1
DCC	ISOC2
LOC100506571	ITGA11
MTERF3	ITGA5
GNB1	ITPA
HMX1	IVD
PUM1	JMJD4
PSMD12	JOSD2
PAICS	JPT1
A1CF	KARS1
XDH	KAT2A
KARS	KATNB1
KRT35	KBTBD6
MAD2L1	KCTD15
FBXO11	KDM7A
TM9SF3	KIF22
LOC102724364 /// SEC22B	KIF7
2023-09-15	KLF16
PPP1R17	KLHL25
GPR3	KNSTRN
COPB1	KPTN
UAP1	KXD1
MMADHC	LAGE3
CLEC4M	LAMA4
BTBD1	LAMTOR1
IFNA17	LAMTOR4
BSPRY	LARP1
ACSL3	LAS1L
RPS6KA4	LCLAT1
ALLC	LCMT1
AC012065.7	LETM1
MUC5AC	LETMD1
ABCG4	LIAS
HAP1	LMAN2
GPR21	LPP
MRPL15	LRFN4
TMEM74B	LRWD1
AQP7 /// LOC100509620 /// LOC101930168	LSM4
OTC	LTA4H
CADM3-AS1	LYAR
OR2N1P /// OR2N1P	LYPLA2
SLC25A32	MANBAL
MRPS10	MAP2K2
GABRP	MAPK12
TCP10L	MCAT
CCDC87	MCRIP1
UPK3A	MCRIP2
ATP1B3	MCRS1
SUZ12	MDH2
MOGAT2	MECR
FSCN3	MED11
CACNA1H	MED18
TAX1BP1	MED24
CPLX3	METTL26
TFEB	METTL2A
LOC441601	METTL2B
EMC7	MFF
IL1RAPL2	MGAT4B
GTF2A2	MGMT
NTRK3	MGST1
SIT1	MICAL2
ZNF444	MICOS13
PLA2G2D	MIEN1
PSMA2	MKS1
CXCR3	MLST8
BPY2	MLX
SEC13	MMAB
ASIP	MMP24OS
HRH2	MMS19
ALAS2	MOB2
CTRL	MPDU1
RNF11	MPI
E2F2	MPST
RAB3D	MPV17L2
PRG2	MRGBP
UBQLN2	MRM1
CXorf36	MRM2
CAMK1G	MRM3
MED13	MRPL1
CDC123	MRPL10
NTSR2	MRPL11
STMN4	MRPL12
OR7C1	MRPL16
CDX1	MRPL20
REPS2	MRPL21
CLC	MRPL23
HNRNPM	MRPL24
EVX1	MRPL27
LAG3	MRPL28
PSMD4	MRPL30
AQP6	MRPL33
CPSF6	MRPL36
B3GNT3	MRPL37
TP53TG5	MRPL4
P2RY4	MRPL40
CEBPZ	MRPL43
GCM1	MRPL44
CA1	MRPL45
WBP5	MRPL47
KRT86 /// LOC100509764	MRPL48
RPF1	MRPL51
BTNL8	MRPL52
PLEKHG3	MRPL53
TAF1	MRPL54
RCE1	MRPL55
PHOX2A	MRPL58
MAPK8IP2	MRPS11
CETN1	MRPS12
GREB1L	MRPS16
KLK13	MRPS21
CXCR5	MRPS23
PIK3IP1	MRPS25
TAS2R1	MRPS26
RSPH6A	MRPS33
SPINK5	MRPS34
ANO2	MRPS36
SGK2	MRPS5
RP3-359N14.1	MRPS7
AADAC	MRPS9
RAB13	MTCH2
PRH1 /// PRH1-PRR4 /// PRH2	MTG1
ZFAND5	MTHFD1L
GTF2I /// GTF2IP1 /// LOC100093631	MTRES1
MPZ	MYBBP1A
HDAC11	MYBL2
SEC31A	MYCBP
XCR1	MYH9
PSMB7	MYL6
TMPRSS6	NAA10
ARHGAP33	NAA20
PROP1	NABP2
CDC42EP2	NACA2
UBE2A	NAP1L4
AK125860 /// RP11-582J16.4	NAT10
ZZZ3	NAT9
TNPO1	NAXE
INHA	NCBP2AS2
C1QTNF9B-AS1	NCLN
LOC51145	NCOR1
MIR22 /// MIR22HG	NDUFA1
GPR143	NDUFA10
CAMK2B	NDUFA11
TMPRSS3	NDUFA12
RWDD1	NDUFA3
PSORS1C2	NDUFAF1
FAM107A	NDUFAF2
SLC9A3R1	NDUFAF3
AXIN1	NDUFAF4
CHP2	NDUFAF8
LINC00574	NDUFB10
NFASC	NDUFB7
RAB3IL1	NDUFB8
MKRN7P	NDUFB9
MEP1B	NDUFS2
PLD2	NDUFS3
FKBP6	NDUFS5
TNFSF12 /// TNFSF12-TNFSF13	NDUFS7
EIF4A1 /// LOC101928634 /// SENP3-EIF4A1 /// SNORA48 /// SNORA67 /// SNORD10	NDUFS8
GLP2R	NENF
GDAP1L1	NFS1
NTN1	NHP2
HTR1A	NIFK
RACGAP1	NIP7
SCFD1	NKIRAS2
SMARCE1	NLE1
METTL5	NLGN2
ELF3	NMB
RNPEPL1	NME2
GPR32	NME3
GSTM5	NME4
MYCLP1 /// MYCLP1	NMT1
GNAO1	NOB1
CES3	NOC2L
ERH	NOC4L
ARSA	NOL10
CNGB3	NOLC1
SMARCD1	NOP14
BNIP3L	NOP16
MRPL13	NOP2
UBASH3A	NOP53
PEG3 /// ZIM2	NOP56
PSMA7	NOP58
SOX2	NOSIP
TBKBP1	NPM3
THRB	NPRL2
PABPC1P1 /// PABPC1P1	NPW
TROVE2	NR2C2AP
SIGLEC9	NR2F2
NTNG1	NSMCE1
SLC8A2	NSMCE2
ABCD3	NSUN5
INTS8	NT5C
SLC39A7	NT5C3B
TAAR3	NTHL1
ELK1	NTMT1
SRCAP	NUBP2
CDH18	NUDC
LAMTOR3	NUDT16L1
DRD5	NUDT5
STATH	NUP88
TEX13A	NUP93
TMPRSS4	NUTF2
STARD8	NXT1
LPCAT4	ORC6
KLK11	ORMDL2
MEF2B /// MEF2BNB /// MEF2BNB-MEF2B	OSER1
FERMT2	OST4
GFOD2	OTUB1
PLEKHA6	P4HA3
CYP4F12	PABPC4
SEC22B	PABPN1
KLHL35	PAM16
ITGAV	PARVB
SLC17A7	PAXX
PDZD7	PCCB
B3GALT5	PDAP1
VPS26A	PDCD11
KCNAB2	PDCD2
REN	PDCD2L
SEMA6C	PDCD6
ACHE	PDGFRB
PRC1	PDHB
NUDT3 /// RPS10-NUDT3	PDRG1
ITPKC	PDSS1
TNFRSF13B	PEBP1
EDA2R	PEMT
IRF5	PES1
PCDHGA9	PEX16
NGRN	PFDN6
BFAR	PGAM5
HCRTR2	PGAP2
NPAP1	PGM1
NUCB2	PHB
ANXA2	PHB2
GABRQ	PHKG2
PRKDC	PHPT1
NT5C1B-RDH14 /// RDH14	PIGQ
PSMD7	PIH1D1
ELK2AP	PIN1
CYP1A1	PLAU
ABCE1	PLD6
SCGN	PLEKHJ1
AC074212.6	PLPP4
BTNL2	PMEPA1
SPIN2A	PMF1
RASAL1	PMPCA
KLK5	PNO1
RELN	POC1A
VRK1	PODXL2
FOLR3	POLDIP2
HOXA3	POLE4
CARD10	POLG2
MFAP1	POLL
ETV4	POLR1B
OR52A1	POLR1D
REV1	POLR2C
MAFB	POLR2I
KLK8	POLR2J
SEC24A	POLR2L
OLA1	POLR3B
C19orf57	POLR3E
ALOXE3	POLR3K
TSNAXIP1	POMGNT1
TTTY2 /// TTTY2B	POP7
FRMD1	PPAN
MRPL9	PPCDC
GJB4	PPFIBP1
SNRPE	PPIE
AC007389.3	PPIF
PADI1	PPM1G
INS	PPP1R7
PPP3CA	PPP2R1A
TXN	PPP2R3A
COL4A1	PPP4C
CCRN4L	PQBP1
ECE2	PRDX5
MORF4L2	PREB
VSX1	PRELID1
CDK2AP1	PRKAG1
TBC1D29	PRKX
SH3GLB1	PRMT7
KRT8P11 /// KRT8P11	PRPF19
CCT7	PRPF31
ATP10B	PRPF6
GDF9	PRR13
ZNF219	PSMB2
MRFAP1L1	PSMB6
PPBPP2	PSME3
MIR6732 /// ZC3H12A	PSME3IP1
PLEKHG6	PSMF1
BSN	PSMG3
ANK1	PTCD3
ALG5	PTDSS2
WDTC1	PTGES2
CGB1 /// LHB	PTGFR
DBH	PTMS
CA6	PTOV1
FOXB1	PTPN3
TPSG1	PTRHD1
CCZ1 /// CCZ1B	PUS1
TYR	PYCR3
ABCC2	PYM1
GRAP2	QARS1
CLDN6	QDPR
TMEM106B	QPCTL
MROH7	RABL6
ARCN1	RAC3
G3BP2	RACK1
WFDC2	RAD51
CASR	RAE1
MRPL19	RAMAC
STXBP2	RAMACL
LOC100506469	RANGAP1
LDB1	RBM19
DENR	RBM42
PNLIP	RBMX
TRBV5-2 /// TRBV5-2	RBMX2
GPR12	RCC1
CSH1 /// CSH2	RCC1L
KIAA0391 /// PSMA6	RCCD1
RANBP9	REX1BD
SCN3B	REXO4
CAND1	RHBDD1
UBQLN3	RHOT2
IFT122	RIOK1
OR2S2	RMND1
SRSF3	RMND5A
NPTN	RNASEH2C
RBMS1	RNF126
GPX5	RNF181
SHCBP1	RNPS1
STRA6	RPA3
TEX11	RPF2
SNX7	RPL10
DPM1	RPL13
SARM1	RPL13A
CTLA4	RPL14
VEZF1	RPL15
KCNS1	RPL17
AIMP1	RPL18
AP3S1	RPL18A
KRT5	RPL19
ZC3H4	RPL21
F11	RPL22L1
LOC101929087 /// SUMO2 /// SUMO3	RPL23
NXPH3	RPL23A
DDOST	RPL27
KIR2DS1	RPL28
OR1D5	RPL29
TMEM180	RPL3
LCN2	RPL31
MYOC	RPL35A
ME1	RPL36A
INO80D	RPL37A
NANS	RPL38
PRSS3	RPL4
NKX3-1	RPL41
EFR3A	RPL5
MTIF2	RPL7A
GNG3	RPLP0
IL22	RPP25L
MUC5B	RPP30
LOC101929550	RPP40
PRAMEF1 /// PRAMEF2	RPS10
DYNLT1	RPS13
SEC63	RPS14
SEC62	RPS15
NOL7	RPS16
SUCO	RPS18
VDAC2	RPS19BP1
WT1-AS	RPS2
GNA14	RPS20
RAB3A	RPS26
AATK	RPS28
KCNMB2	RPS29
ARHGEF16	RPS5
GFAP	RPS6
LYL1	RPS6KA1
FBXW12	RPS6KB2
LRCH4	RPS8
STAG2	RPS9
UBE2Q1	RPSA
SHBG	RPSAP58
HNRNPD	RPUSD1
CSH1 /// CSH2 /// CSHL1 /// GH1	RPUSD2
PAK4	RPUSD4
ACVR2B-AS1	RRP1
ROBO1	RRP12
GML	RRP7A
LIM2	RRP9
VBP1	RRS1
COX7A2	RSL1D1
UBTD1	RUNDC1
COPB2	RUVBL1
RELB	SAAL1
GPR31	SART3
CHST8	SCAND1
CA5A	SCARB1
IL19	SCIN
ZNF556	SCO2
BIK	SCRN2
NCR1	SCT
C4orf19	SDHAF1
SLAMF7	SDHAF2
MCM6	SDHB
DEGS1	SDSL
CHD9	SELENOH
SSTR4	SELENOO
RCVRN	SELENOS
DPP8	SELENOW
HMP19	SEM1
TMEM14A	SEMA3A
GCN1L1	SEMA3C
PPP1CB	SENP3
POLR2K	SERF2
PROL1	SF3B6
SLC28A3	SFT2D1
GCK	SFXN1
GRM3	SFXN4
BRINP2	SGTA
ART4	SHARPIN
KRT33B	SIGMAR1
ARL5A /// LOC101929356	SIRT7
SPAG11A /// SPAG11B	SLC19A1
HDAC2	SLC25A11
GTF2H5	SLC25A22
AKAP5	SLC25A3
PPP1R13L	SLC25A39
ADAM30	SLC25A5
GNAI3	SLC2A1
PAX8	SLC35C2
KLC1	SLC5A6
CRYGC	SMARCD2
COL3A1	SMIM26
AURKC	SMIM4
EXTL2	SMUG1
SRD5A2	SMYD5
ADCY1	SNAPC5
LINC01136	SND1
NOS1	SNRNP25
SEH1L	SNRNP70
TNXA /// TNXB	SNRPA
TPRKB	SNRPC
SPEF1	SNU13
VNN3	SNX17
STK3	SNX22
TSSK2	SP7
TMED2	SPAG7
SHFM1	SPCS1
C1orf174	SPOUT1
GPR137	SRA1
ABTB2	SRSF9
EIF2AK3	SSNA1
GPR97	SSR4
CCDC7	STARD3
DDN	STIP1
NRL	STK16
GAST	STK25
HERC2	STK32C
LRPPRC	STUB1
NUTF2 /// NUTF2P4	SULF2
RNF123	SUPT4H1
LOC101930324 /// NSF	SUPT7L
B3GALT1	SUPV3L1
S100A14	SURF1
HSPE1	SURF2
PSMD6	SURF6
DPY30 /// MEMO1	SYMPK
C11orf73	SYNGR2
CCT2	SYS1
BANF1	TACO1
CRYGA	TAF10
LINC00950	TAF15
PTGES3	TARBP2
BTG3	TATDN1
CAMKV	TBC1D7
IRF2BP1	TCF25
AKAP2 /// PALM2-AKAP2	TCOF1
BPIFA1	TCP1
CAPZA2	TEDC2
CCDC9	TELO2
CNTNAP1	TGFB3
ANP32E	THADA
CAMSAP2	THAP11
DENND1C	THAP4
TRA2B	THG1L
CD72	THOC3
AGPAT5	THOC6
PGC	THOP1
ADAMTS7	TIAL1
CLEC1A	TIMM10
CKS1B	TIMM22
DUT	TIMM23
SAE1	TIMM44
CSDE1	TIMM50
WT1	TIMM8A
SCAMP5	TIMMDC1
PGPEP1	TIPIN
SCTR	TLCD1
FAIM2	TLCD5
DBF4	TLE5
ZSWIM1	TMEM101
LAPTM4B	TMEM141
ANKRD2	TMEM147
UFC1	TMEM14C
CD1A	TMEM160
CCT8	TMEM177
EPHB1	TMEM179B
ATP5F1	TMEM186
FAM153A	TMEM219
TLR6	TMEM222
LMX1B	TMEM256
ZNF467	TMEM41A
CCL14 /// CCL15-CCL14	TMEM64
NKAIN1	TMF1
ZNF574	TNIP2
TOR4A	TNKS1BP1
SLC9A6	TOMM22
CLIP3	TOMM34
KCNJ10	TOMM40
HELZ	TOMM5
SLIRP	TOMM7
PRLH	TOP1MT
IARS	TP53RK
GALNT8	TPI1
DNAJA4	TRABD
CD22	TRAF2
CCDC71	TRAP1
KCTD17	TRAPPC2L
ACR	TRAPPC3
RP11-429B14.4	TRIM28
EXTL1	TRIP6
BCL7A	TRMT10C
IGHG1 /// LOC100293211	TRMT61A
MAGEC2	TRNAU1AP
CYP3A43	TRPT1
OCA2	TRUB2
DYNLT3	TSEN54
YES1	TSPAN4
RPA2	TSR3
DOK3	TSTA3
TRAPPC11	TTC1
CBX3	TTC27
CBL	TTC3
NPR1	TTLL12
RBPJL	TTYH3
EXOSC10	TUFM
NUP85	TUSC2
RB1CC1	TUT1
RSG1	TWNK
SGCA	TXLNG
CHRM2	TXN2
NCR3	TXNDC17
NLGN3	TXNRD2
PEAK1	U2AF2
MYCL	UBA52
RBM12	UBAC1
C4orf27	UBE2F
DSG3	UBE2I
ASXL2	UBE2M
PPIL6	UBL7
IL17RC	UBTF
PPP1R14D	UBXN1
FXYD7	UCHL1
SEMA4G	UCKL1
ARHGEF28	UMPS
PSMA3	UNC45A
LASP1	UQCC3
ARL1	UQCR11
FUT6	UQCRC1
GMNN	UQCRFS1
WSB2	UQCRH
LOC100507388	UQCRHL
SPOP	UQCRQ
PRAMEF11	URI1
DR1	UROD
PSMD1	USF2
RGS6	USP39
ESRP1	USP5
GATC /// SRSF9	UTP23
SLC30A1	UTP4
TRIM37	VANGL1
HLTF	VARS1
ELAVL4	VCL
NAE1	VDAC3
MIR1304 /// SNORA1 /// SNORA18 /// SNORA32 /// SNORA40 /// SNORA8 /// SNORD5 /// TAF1D	VPS25
HSPD1	VPS28
SH3TC2	WBP2
RABL3	WDCP
CETN3	WDR18
FOXRED2	WDR4
TNS4	WDR46
MIR631 /// NEIL1	WDR54
CCNK	WDR62
EBNA1BP2 /// MIR6733	WDR74
MRPL17	WDR77
GLO1	XPO6
PSG9	YARS2
NPEPL1	YBX3
LAMC1	ZBTB8OS
FNDC8	ZC3HC1
HCRT	ZCCHC17
ZMPSTE24	ZDHHC12
ZNF552	ZFAND2B
RTCA	ZFYVE19
LAIR2	ZMAT2
REG1A	ZNF428
SMR3A	ZNF469
RNF138	ZNF511
TSN	ZNF581
DDX18	ZNF593
KRT23	ZNF691
ANGPT4	ZNF875
LTN1	ZNHIT1
CBX2	ZNRD1
HPRT1	ZNRD2
NUP153
LOC101928378
CHMP3 /// RNF103-CHMP3
AZIN1
MZB1
FOLH1
CMPK1
ADAM20
TEX13B
PIGK
SPANXA1 /// SPANXA2 /// SPANXC
SPN
GCKR
CHMP5
CRHBP
RFX2
TUBAL3
ARHGEF5
CPSF1
DNAI2
DNAJB5
HLA-DOB
KIAA0368
LYPLA1
PLIN1
GRIN2A
DUX1
MARCKS
TBCEL
ARMCX4
KLF1
ITGA3
ETF1
SERPINB10
PITPNB
ADD3-AS1
ERGIC2
GRHL2
ADSL
DLEC1
TDRKH
ATF6B
CCL7
HOXC13
MTX2
CER1
GDF5
RNF139
CHRNB2
SNRPD2
ZFHX2
DPF3
NBAS
SPINK4
SLC6A4
THUMPD1
DNAJA1
PSMC1
KMO
GALNT1
NOX5
NOL11
CCNC
C6orf62
KLK7
SNED1
ENAH
OR7E12P
CLTC
LRRC59
YBX1
DHX15
HYPM
EIF3M
CHGA
CORO1C
LTB4R2
CDC27
PSMB5
HNRNPA1P31 /// HNRNPA1P31
AC003989.4
IZUMO4
RBX1
UTP11L
IL1RL1
DMWD
CD3E
CD40LG
SLC6A9
SERBP1
OR12D3 /// OR5V1
PPP1R2P9
OR1A2
VAPA
GCNT1P1 /// GCNT1P1
SPCS2
UTP18
RARS
SLC6A12
UQCRH /// UQCRHL
DSTN
HPCA
NPBWR2
CEACAM21
CTSG
UBL5
CNIH4
ARMCX1
POSTN
TMEM87A
APBB3 /// MIR6831
TAF2
EGOT
BCL10
SIX3
HSD17B14
CLDN15
YY1AP1
RALA
SNRPB2
MBP
CACNB4
KCNE2
HNRNPR
GMPS
EFNA2
UBA3
SLC25A24
PAK1IP1
HN1
ERBB3
RAP1GAP2
RBM15
GPR27
A4GALT
SOCS7
RNF7
LMOD1
PLEKHB1
ATP6AP2
HMGB1
LRRC37BP1
NR1H4
ST8SIA2
CIDEA
SHC1
CST5
FAM46A
CYP17A1
TLR8
SCN2A
KRT10
POMC
ALOX12B
SNAPC2
GMFB
WNT2
SSR2
HSP90B1
ALOX12
PRORY
ATP1B2
CHIC2
TOMM70A
PSMD10
BLOC1S1-RDH5 /// RDH5
SMR3B
SNW1
SPHK2
LILRA4
NR3C1
KIF5B
MRPL42
IMPA1
RABGAP1
ALDH1A2
NUP37
H3F3A /// H3F3AP4 /// H3F3B
SCNN1D
MAP4K4
PFDN2
ANXA5
ATPIF1
GPR89A /// GPR89B
CD3G
CHRNA3
SSRP1
DLG4
KAT8
DDX1
ZNF207
TEX40
MAGED1
RAP2C
GALNT4 /// POC1B-GALNT4
SARDH
CLDN9
GDF2
NPHS2
BICD2
MEAF6
OR1G1
HSP90B1 /// MIR3652
PADI3
DISC1
CTB-102L5.7
ANXA2P2
TMED10
KATNA1
C17orf53
APEX1
ADAM5
LIMS2
TRPM2
PAX7
BV03S1J2.2 /// IL23A /// TCRB /// TCRVB /// TRBC2 /// TRBC2 /// TRBJ2-7 /// TRBJ2-7 /// TRBV19
CLCN1
TMEM209
CNPY2
GOT2P1 /// GOT2P1
CDK6
LOC101928061 /// SERP1
CD177
CELA3B
TLX3
CIDEB
GNLY
PSMA1
ADAM29 /// LOC101928551
HEYL
HNRNPA3 /// HNRNPA3P1
KCNE1
HNRNPC
CRP
AGL
FSHB
ATP5O
FBP2
PGM5
TGM3
OR12D3
SLC12A6
CTSW
UBE2V2P3 /// UBE2V2P3
RPN2
FTSJ2
GFI1
FXR2
ATG3
PDGFC
CSN2
LOC100509646 /// PRY /// PRY2
KREMEN2
ACTL6A
CALB2
DHX40
HSPA1L
RRM2
EIF3J
FMR1
DNAJC7
IGHD /// IGHG1 /// IGHM
IL36A
METAP2
TMEM131
GDI2
ECRP
ETNK2
S1PR4
LOC102725263 /// LOC389906
DSTNP1 /// DSTNP1
NAAA
KDELR2
NEDD8
FAM110D
GARS
C14orf166
BTBD3
PTBP2
MTNR1B
ARHGEF15
KPNB1
GGTLC1
SFPQ
UBE2E3
FAM3C
LOC101060363 /// PPIA
GBAP1 /// LOC100510710
ACBD4
PLEKHA5
GTF3C3
IBTK
RFPL3
TOMM20
TMEM165
SPOCK2
CDC20
ZNF646
TCF4
APOL6
P2RY2
BMS1
TRIM17
RIPK4
KRT34 /// LOC100653049
AGPAT3
RHO
PCDH1
CTNNA3
CCT4
PRRG2
ANAPC5
BRSK2
CTRB1 /// CTRB2
DDX6
TCF15
LOC100289473
TINAGL1
SPRR1A
MRAS
FAM212B /// LOC101928718
DCAF6
UBE2S
IMPDH2
ZNF292
NEUROD4
CRY1
CUL5
LZTS3
HAND1
CRYBB1
C16orf80
SLC22A2
HNRNPH3
THOC7
PWP1
SUN2
RRAGC
RRH
RMDN1
GTF2B
C11orf58
GSTA4
TRAM2
P2RX2
PVRIG
SCN5A
CRYBB3
SSB
TMEM45A
ZC3H15
ARVCF
C1D
SRSF10
TCF12
GIMAP1-GIMAP5 /// GIMAP5
FAM184A
HNF1B
TUBB6
UBE4A
PNMA1
FGF21
MAMLD1
CYFIP1
CD79A
HIRA
ICE1
LOC100134822 /// LOC100288069 /// LOC100996442 /// LOC101927270 /// LOC101928344 /// LOC101928670 /// LOC101929540 /// LOC102724409
FBXO31
SET /// SETP4 /// SETSIP
POGZ
TRAM1
COL6A3
CCDC30
UBE2D3
NR0B2
CNNM2
TAS2R4
SP3P
FOXI1
RBM12B-AS1
EBAG9
PDPR
SRP9
RBBP6
RPRM
LOC101927057 /// OMG
TKTL1
SPAG6
LUM
RORC
SORBS3
XRCC5
COPG2IT1
APP
C7orf43
MAP6D1
HTATSF1
S1PR2
ATP10D
BIRC2
HTR1B
SLC16A1
RRM1
PPP2R3C
FZD9
OR2C1
TVP23B
ALDH3A1
KTN1
UCHL3
ATP5E
MST1R
TFAP4
TCERG1
ZNHIT6
SPANXA1 /// SPANXA2 /// SPANXB1 /// SPANXC
MTCH1
FFAR3 /// GPR42
KCNMB1
SPTBN4
TMPRSS2
C6orf123
CTCF
GABARAPL3
CRMP1
CD79B
GDPD3
CTF1
GRID2
SCN4A
PPIA
GNL2
CETN2
SLC22A13
NR1I2
SLC13A2
KANK3
SLC35A5
GBAS
RNASEH1
CCNJL
SSX3 /// SSX5 /// SSX7
HIST1H1T
AQP9
CCDC59
SELP
ST14
TMEM140
MMP8
RFC4
LSM8
KCMF1
CALM1 /// CALM2 /// CALM3
CSH1 /// CSHL1 /// GH1
TSPAN1
FSHR
RRAGA
STARD5
NFU1
POU6F2
SIGIRR
ACTB /// ACTG1
RHOA
CSN3
MIR622
ITGA8
HIF1A
P2RX5 /// P2RX5-TAX1BP3 /// TAX1BP3
TMCO1
GCHFR
AC005838.2
GPR22
PIK3C2A
SCAF8
GLS2
C1orf115
SSBP1
PITPNM1
ABLIM3
C11orf21
FGF1
CRCT1
PRSS53
TCEB1
MAPK6
LRRC40
SSR3
MIR1236 /// NELFE
NUP107
U2AF1
MYBPH
HOXB1
NXPH4
ARID3B
DNAAF2
DNTTIP2
PREX2
IL13
KRT81
EPN1
SMC4
NARS
C21orf59
SERINC1
PITX3
OR10C1
ITGB7
NUP43
FSTL1
TMEM14B
PI3
DERL1
NT5DC3
GPD1
ADAM10
SERHL /// SERHL2
RAD21
LGALS1
SLC2A4
PSMC2
HGH1
EXOC1
TGM2
S100A11
LOC101928747 /// RBMX /// SNORD61
RECQL
KLRG1
GPR144
GABRA4
NT5DC2
FOXD4 /// FOXD4L1
MTERF4
HNRNPA2B1
HNRNPK
DPYSL2
AMZ2
APBB1
IFRD1
TOR1B
ARMC1
SLC5A2
CRNN
DHRS9
TTTY9A /// TTTY9B
PDHX
PSMC3
EIF3I
SPATA6L
AMN
DISC1 /// TSNAX-DISC1
DLD
GAL3ST1
SLC12A5
RCOR1
CCDC90B
OAT
SYNCRIP
MIR21 /// VMP1
DAD1
EIF4E
NDUFB5
TSC22D4
FOXL1
CBX7
LSM1
SLC9A5
LIMS1 /// LIMS3 /// LIMS3L
SMARCA5
MED17
CCL11
SUV420H1
ODF1
ANXA1
PLLP
UBE2E1
UBR7
IK
RWDD3
RTDR1
RAB25
PRSS8
YARS
KHDRBS1
NDUFA4
YWHAZ
CPN2
NARF
TMED7 /// TMED7-TICAM2
CLCC1
ZNF12
AOX1
LLGL1
FGF14
TCTN2
LSM5
RTF1
SLC9A3
ORAI3
PKD2
ADAR
PRR15L
CBWD1 /// CBWD2 /// CBWD3 /// CBWD5 /// CBWD6 /// CBWD7 /// LOC101060578
KCNQ1DN
CYP4F2
TCL1A
KIF18B
AQP2
MKL2
CYP2C19
SERPINA2
SLC17A4
DNAJA1P4 /// DNAJA1P4
PGAP3
EAPP
TNMD
DGKQ
ELAVL1
PAPOLA
KANSL3
NDUFA8
NDUFA6
SMNDC1
CMTM6
ARPC3
PPP1CC
RHOF
EVPL
SHC2
CTBP2
PTPN7
CNN3
SLC2A9
RPL3L
BCAM
SUB1
PNMA3
PROZ
LEPRE1
GOLGA5
TMED3
CYP2C18
EPB41L2
SLC17A1
MTHFS /// ST20-MTHFS
CLUHP3
LIMD2
MELK
SAR1A
TFCP2L1
SERINC3
TBL1XR1
SMURF2
CASP3
[truncated: 2,537 more rows]

## Sheet: Sheet2
ADSL
AEBP1
AHSA1
AIMP1
ALDH18A1
ALDOA
ALG8
ANAPC5
ANP32A
APTX
ARMC6
ATP6V0B
ATP6V0E2
ATRAID
AURKAIP1
BANF1
BCAP31
BTBD1
BTF3
C1QBP
CALD1
CCDC71
CCNH
CCT2
CCT4
CCT5
CCT7
CDC123
CDC27
CDK5RAP3
CEBPG
CHCHD3
CHMP2A
CKS2
CNBP
CNPY2
COL3A1
COL5A1
COL6A2
COL6A3
COPA
COPS3
COPZ1
COX5A
COX6B1
COX6C
COX7A2
COX7B
CSE1L
DAZAP1
DCAF16
DCXR
DGUOK
DNAJC7
DOHH
DYNLL1
E2F4
ECHS1
EDF1
EEF1E1
EGFR
EIF2B1
EIF2S2
EIF3B
EIF3D
EIF3E
EIF3H
EIF3I
EIF3J
EIF3M
ELAVL1
EMC8
ENY2
ESRRA
EWSR1
FAM50A
FBL
FUZ
GABARAPL2
GAPDH
GAR1
GEMIN7
GGCT
GNAI1
GPI
GPN3
GTF2A2
GTF3A
GTPBP4
HAGH
HDAC2
HMGN3
HNRNPA1
HNRNPA2B1
HNRNPAB
HNRNPC
HNRNPD
HOXC8
HPRT1
HRAS
HSD17B8
HSPA4
HSPA9
HSPB6
HSPD1
HSPE1
ID3
IMPDH2
INTS8
ITGB1BP1
LAMB1
LAMTOR5
LAP3
LDHB
LIMA1
LOXL1
LRPPRC
LRRC23
LSM14A
LSM2
LSM7
LSM8
LYRM4
MACROD1
MAD2L1
MAP3K14
MCM7
MED28
MFSD10
MRPL13
MRPL15
MRPL18
MRPL22
MRPL42
MRPL9
MRPS15
MRPS2
MRPS35
MRTO4
MTERF3
MTX1
MTX2
MVD
MXRA5
MYC
MYL6B
NACA
NAE1
NAP1L1
NCL
NDUFA8
NDUFAB1
NDUFB2
NDUFB3
NDUFB4
NDUFB5
NDUFS6
NDUFV1
NEDD8
NELFCD
NGRN
NID2
NME1
NOL7
NOP10
NPM1
NSA2
NUDT1
NUP37
NUP43
OAZ1
ODC1
PA2G4
PAICS
PAK1IP1
PARK7
PCBD1
PCMT1
PDCD5
PEF1
PEPD
PFDN4
PFDN5
PMPCB
PNPLA2
POLD2
POLR2E
POLR2G
POLR2H
POP4
POP5
POSTN
PPA1
PPIH
PPP1CA
PPP1R14B
PRDX1
PRMT1
PSMA1
PSMA4
PSMA5
PSMA7
PSMB1
PSMB3
PSMB4
PSMB5
PSMB7
PSMC5
PSMD1
PSMD11
PSMD13
PSMD14
PSMD3
PSMD4
PSMD6
PSMD8
PSMG1
PTDSS1
PTGES3
PTMA
PTRH2
PTTG1
PUF60
PWP1
RABGGTB
RAD21
RAN
RASSF7
RBX1
RFXANK
RPL10A
RPL11
RPL12
RPL22
RPL24
RPL26L1
RPL27A
RPL30
RPL32
RPL34
RPL35
RPL36
RPL37
RPL39
RPL6
RPL7
RPL8
RPL9
RPLP2
RPS11
RPS12
RPS15A
RPS17
RPS19
RPS21
RPS23
RPS24
RPS27A
RPS3
RPS4X
RPS7
RSL24D1
RUVBL2
RWDD1
SEC11A
SERPINB6
SF3B5
SLC25A10
SLC25A6
SLC35B1
SLC7A8
SLIRP
SMAP1
SNAI2
SNF8
SNRPA1
SNRPB
SNRPD1
SNRPD2
SNRPD3
SNRPE
SNRPF
SNRPG
SQLE
SRI
SRM
SRP14
SRP19
SRSF3
SRSF7
SSB
SSBP1
SSR2
SSRP1
STOML2
TAF12
TALDO1
TARDBP
TBCA
TBCB
TBKBP1
TFB2M
THOC7
TIMM13
TIMM17A
TIMM8B
TKT
TMEM14B
TMEM258
TMEM45A
TPD52L2
TPM4
TPRKB
TRIAP1
TRIT1
TRMT112
TSPO
TUBG1
TXN
UBA2
UBE2C
UBE2N
UBL5
UFC1
UNG
UQCR10
UQCRB
UQCRC2
URM1
UTP6
VDAC1
VDAC2
VRK1
WDR12
WDR43
WDR61
WNT10B
YBX1
YIF1B
YTHDF1
YWHAE
ZNF146
ZNF302
ZNHIT2
