# Supplementary material for: USP22 as a key regulator of glycolysis pathway in osteosarcoma: insights from bioinformatics and experimental approaches
Source: PeerJ. 2024 May 20;12:e17397. doi: 10.7717/peerj.17397 (PMC11114114; doi:10.7717/peerj.17397)
Supplement: Supplemental Information 2 — Functional enrichment analysis of 344 common genes. [file peerj-12-17397-s002.xlsx]

## Sheet: GO enrichment analysis
Category	Term	Count	%	PValue	Genes	List Total	Pop Hits	Pop Total	Fold Enrichment	Bonferroni	Benjamini	FDR
GOTERM_BP_DIRECT	GO:0006412~translation	44	12.828	1.71297e-32	MRPS15, RPL30, RPL32, MRPL18, RPL34, RPL12, RPL11, MRPL15, RPL10A, RPL8, MRPL13, RPL9, EGFR, RPL6, RPL7, RPS4X, MRPL42, RPS17, RPS15A, RPS19, RPL36, RPS3, RPL35, RPLP2, RPL37, MRPL9, RPS27A, RPS11, RPL39, RPS12, RPS7, RPL22, MRPS2, MRPL22, AIMP1, NACA, RPL27A, RPL24, EEF1E1, RPS21, RSL24D1, RPS24, RPL26L1, RPS23	337	223	19333	11.3192	2.72191e-29	2.72191e-29	2.65853e-29
GOTERM_BP_DIRECT	GO:0002181~cytoplasmic translation	32	9.32945	3.44946e-32	RPL30, RPL32, RPL34, RPL12, RPL11, RPL10A, RPL8, RPL9, RPL6, RPL7, RPS4X, RPS17, RPS15A, RPS19, RPL36, RPS3, RPL35, RPLP2, RPL37, RPS27A, RPS11, RPL39, RPS12, RWDD1, RPS7, RPL22, RPL27A, RPL24, RPS21, RPS24, RPL26L1, RPS23	337	90	19333	20.3975	5.4812e-29	2.7406e-29	2.67678e-29
GOTERM_BP_DIRECT	GO:0000398~mRNA splicing, via spliceosome	20	5.8309	2.45707e-09	SF3B5, LSM2, LSM8, UBL5, LSM7, SNRPD2, SNRPD1, HNRNPA2B1, SNRPG, SRSF3, PPIH, SNRPA1, SNRPE, SNRPD3, SNRPF, HNRNPC, GEMIN7, HNRNPA1, SRSF7, SNRPB	337	201	19333	5.70825	3.90427e-06	9.5101e-07	9.28866e-07
GOTERM_BP_DIRECT	GO:0043161~proteasome-mediated ubiquitin-dependent protein catabolic process	19	5.53936	3.48424e-08	PSMD11, PSMD14, PSMD13, PSMA7, RBX1, PSMD8, PSMA5, PSMB7, PSMD6, PSMC5, PSMB4, PSMA4, PSMB5, PSMD4, PSMA1, PSMB3, PSMD3, PSMB1, PSMD1	337	212	19333	5.14147	5.53631e-05	5.53646e-06	5.40754e-06
GOTERM_BP_DIRECT	GO:0050821~protein stabilization	18	5.24781	3.26574e-07	CCT2, WNT10B, NPM1, RPS7, CCNH, PTGES3, RPL11, PARK7, GTPBP4, HSPD1, RUVBL2, POLR2E, CCT7, PFDN4, GAPDH, PFDN5, CCT5, CCT4	337	220	19333	4.69374	0.000518791	3.93465e-05	3.84303e-05
GOTERM_BP_DIRECT	GO:0008380~RNA splicing	17	4.95627	4.56514e-07	PRMT1, YBX1, THOC7, SNRPD2, PUF60, SNRPD1, C1QBP, SNRPG, SNRPA1, SNRPD3, SNRPF, HNRNPC, HNRNPA1, TARDBP, SRSF7, SNRPB, FAM50A	337	200	19333	4.87628	0.000725137	4.50747e-05	4.40251e-05
GOTERM_BP_DIRECT	GO:0006457~protein folding	16	4.66472	3.46665e-07	HSPA9, CCT2, HSPA4, PTGES3, AHSA1, TBCA, HSPE1, HSPD1, DNAJC7, RUVBL2, PPIH, CCT7, PFDN4, PFDN5, CCT5, CCT4	337	172	19333	5.33655	0.000550699	3.93465e-05	3.84303e-05
GOTERM_BP_DIRECT	GO:0051301~cell division	15	4.37318	0.00743738	CDC123, UBE2C, VRK1, GNAI1, PPP1CA, PTTG1, RAD21, CDC27, RPS3, CKS2, NUP43, ANAPC5, RAN, NUP37, MAD2L1	337	383	19333	2.24679	0.999993	0.227269	0.221977
GOTERM_BP_DIRECT	GO:0015031~protein transport	15	4.37318	0.022044	BTF3, TIMM8B, GABARAPL2, ENY2, MTX1, MTX2, TIMM13, FUZ, COPZ1, YIF1B, NACA, CHMP2A, NUP43, RAN, NUP37	337	439	19333	1.96018	1	0.455738	0.445126
GOTERM_BP_DIRECT	GO:0006364~rRNA processing	14	4.08163	4.82234e-07	POP5, RPS7, POP4, RPL11, PA2G4, PWP1, WDR43, RPL7, FBL, RPS17, NSA2, RPS19, MRTO4, RPS24	337	131	19333	6.13093	0.000765976	4.50747e-05	4.40251e-05
GOTERM_CC_DIRECT	GO:0005829~cytosol	188	54.8105	1.34778e-28	SRP19, RPL30, RPL32, RPL34, CSE1L, PDCD5, NUDT1, PARK7, SRP14, RPL10A, RPL8, RPL9, RPL6, RPL7, PSMD8, PCMT1, RPS17, PSMD6, PTTG1, PSMD4, RPS19, SNRPD2, SNRPD1, RUVBL2, PSMD3, CDC27, RPL36, PSMD1, RPL35, BANF1, RPL37, SNRPD3, RPS11, RPL39, HMGN3, CDK5RAP3, RPS12, GABARAPL2, TPM4, RPS7, RPL22, TALDO1, VRK1, GTPBP4, THOC7, RBX1, PPA1, ARMC6, SNRPG, RPL24, ANAPC5, SNRPE, LAP3, GEMIN7, HPRT1, SNRPF, S…	341	5520	20580	2.05546	5.91674e-26	2.95837e-26	2.58773e-26
GOTERM_CC_DIRECT	GO:0005634~nucleus	162	47.2303	8.11592e-13	RPL30, CCNH, POP4, CSE1L, PDCD5, NUDT1, PARK7, SRP14, RPL10A, PWP1, RPL9, RPL6, RPL7, PSMD8, FBL, CHCHD3, PTTG1, PSMD4, SNRPD2, SNRPD1, MYC, RUVBL2, PSMD3, CDC27, MACROD1, PSMD1, BANF1, SNRPD3, HMGN3, CDK5RAP3, RPS7, RPL22, GTF3A, TALDO1, VRK1, GTPBP4, THOC7, RBX1, EWSR1, NCL, SNRPG, VDAC2, ANAPC5, SNRPE, VDAC1, LAP3, SNRPF, AURKAIP1, SRSF7, SNRPB, PSMD11, ANP32A, PSMD14, PSMD13, TXN, AEBP1, OAZ1…	341	6007	20580	1.6276	3.56281e-10	2.96907e-11	2.59709e-11
GOTERM_CC_DIRECT	GO:0005737~cytoplasm	160	46.6472	5.99349e-15	RPL30, RPL32, RPL34, CSE1L, PDCD5, NUDT1, PARK7, SRP14, RPL10A, RPL8, RPL9, RPL6, RPL7, PCMT1, RPS17, PTTG1, RPS19, RUVBL2, CDC27, RPL36, RPL35, BANF1, RPL37, RPS11, CDK5RAP3, RPS12, GABARAPL2, POSTN, RPS7, RPL22, TALDO1, VRK1, GTPBP4, THOC7, TMEM258, EWSR1, PPA1, NCL, MRTO4, RPL24, SRSF3, PPIH, LAP3, GEMIN7, HPRT1, SRSF7, SNRPB, COPA, ANP32A, PEF1, TXN, AEBP1, OAZ1, LDHB, DGUOK, BTBD1, PRDX1, NA…	341	5593	20580	1.7265	2.63189e-12	3.15271e-13	2.75772e-13
GOTERM_CC_DIRECT	GO:0005654~nucleoplasm	153	44.6064	2.5294e-27	POP5, CCNH, POP4, CSE1L, PARK7, PSMD8, FBL, RPS17, PSMD6, PSMD4, RPS19, SNRPD2, SNRPD1, MYC, RUVBL2, PSMD3, CDC27, MACROD1, PSMD1, BANF1, SNRPD3, RPS11, HMGN3, RPS12, RPS7, GTF3A, VRK1, GTPBP4, THOC7, RBX1, EWSR1, NCL, SNRPG, SRSF3, PPIH, ANAPC5, SNRPE, LAP3, GEMIN7, UQCRC2, SNRPF, AURKAIP1, SRSF7, SNRPB, ENY2, PSMD11, ANP32A, PSMD14, PSMD13, TXN, BTBD1, RAD21, GAR1, HOXC8, ESRRA, UBE2C, RFXANK, …	341	3960	20580	2.33178	1.11041e-24	3.70136e-25	3.23763e-25
GOTERM_CC_DIRECT	GO:0070062~extracellular exosome	98	28.5714	4.96495e-20	RPL30, RPL34, CSE1L, PDCD5, PARK7, RPL10A, FBL, PCMT1, CHCHD3, RPS19, SNRPD2, RUVBL2, PSMD3, RPS11, TPM4, RPL22, TALDO1, PPA1, NCL, RPL24, VDAC1, LAP3, HPRT1, MXRA5, SRSF7, COPA, PEF1, TXN, AEBP1, NID2, LDHB, PRDX1, HSPA9, HSPA4, FUZ, SNF8, PA2G4, PAICS, GGCT, NACA, CHMP2A, UBE2N, HNRNPC, YWHAE, GPI, MYL6B, YBX1, PEPD, RPS4X, RPLP2, TSPO, CCT2, DCXR, AHSA1, SERPINB6, NME1, PSMA5, PSMA4, PSMA1, DN…	341	2219	20580	2.66538	2.17962e-17	4.35923e-18	3.81309e-18
GOTERM_CC_DIRECT	GO:0016020~membrane	94	27.4052	2.88439e-05	YWHAE, GPI, RPL30, RPL32, MCM7, CSE1L, RPL10A, RPL8, ELAVL1, RPL9, RPL6, RPL7, RPS4X, FBL, RPS17, RPS19, C1QBP, RUVBL2, PSMD3, RPL36, RPLP2, TSPO, PSMD1, RPL35, NELFCD, EIF2B1, RPS11, HRAS, CDK5RAP3, RPS12, GABARAPL2, ATP6V0B, TPM4, RPS7, SSR2, DYNLL1, GTPBP4, MED28, NME1, MFSD10, DNAJC7, TMEM258, PTRH2, NCL, RPL24, VDAC2, ITGB1BP1, VDAC1, ALDOA, GAPDH, TMEM45A, SLC25A6, COPA, PSMD11, PSMD13, RPL…	341	3789	20580	1.49725	0.0125828	0.000269415	0.000235661
GOTERM_CC_DIRECT	GO:0005739~mitochondrion	61	17.7843	3.42986e-11	MRPS15, COX7B, NUDT1, TRIAP1, PARK7, NGRN, MRPL42, CHCHD3, MYC, C1QBP, TIMM17A, PMPCB, TSPO, MRPL9, MRPS2, TFB2M, DYNLL1, COX6B1, PTRH2, VDAC2, SLC25A10, VDAC1, HAGH, UQCRC2, PFDN4, AURKAIP1, SLC25A6, ENY2, STOML2, ECHS1, MRPS35, NDUFB5, MRPL18, NDUFB4, TIMM13, NOL7, MRPL15, SRI, MRPL13, HSPD1, UNG, DGUOK, PSMB4, NDUFV1, BCAP31, HSPA9, NDUFA8, MTERF3, MTX2, HSPA4, HSPE1, COX6C, LRPPRC, TRIT1, MRP…	341	1451	20580	2.53719	1.50571e-08	1.15824e-09	1.01313e-09
GOTERM_CC_DIRECT	GO:0005730~nucleolus	44	12.828	5.91874e-05	SRP19, POP5, MRPS15, HSPB6, POP4, PAK1IP1, RPL12, RPL11, NOL7, PWP1, WDR43, RPL7, FBL, RPS19, MYC, C1QBP, RPL36, RPS3, RPL35, RPS27A, RPS11, CDK5RAP3, ZNF146, HSPA9, UTP6, NPM1, RPS7, MTX2, EDF1, VRK1, SSRP1, PA2G4, TBCA, WDR12, APTX, GTPBP4, PPP1CA, NSA2, EWSR1, NCL, MRTO4, EEF1E1, RSL24D1, RAN	341	1396	20580	1.90221	0.0256494	0.000530271	0.000463836
GOTERM_CC_DIRECT	GO:0005743~mitochondrial inner membrane	38	11.0787	6.46341e-15	MRPS15, COX7B, STOML2, MRPS35, UQCRB, NDUFB5, MRPL18, NDUFB4, NDUFB3, TIMM13, NDUFB2, MRPL15, UQCR10, MRPL13, COX5A, HSPD1, LDHB, MRPL42, CHCHD3, TIMM17A, RPS3, PMPCB, MRPL9, NDUFV1, TMEM14B, TIMM8B, NDUFA8, MRPS2, COX6C, MRPL22, COX6B1, NDUFS6, NDUFAB1, SLC25A10, ALDH18A1, UQCRC2, AURKAIP1, SLC25A6	341	479	20580	4.78783	2.82685e-12	3.15271e-13	2.75772e-13
GOTERM_CC_DIRECT	GO:0005840~ribosome	32	9.32945	4.72638e-23	MRPS15, RPL32, MRPL18, RPL34, RPL11, RPL10A, RPL8, MRPL13, RPL9, RPL6, RPS4X, MRPL42, RPS17, RPS15A, RPS19, RPL36, RPS3, RPL35, RPL37, MRPL9, RPS27A, RPS11, RPS7, RPL22, MRPS2, RPL27A, RPL24, AURKAIP1, RPS21, RSL24D1, RPS24, RPS23	341	176	20580	10.9731	2.07488e-20	5.18721e-21	4.53733e-21
GOTERM_MF_DIRECT	GO:0005515~protein binding	196	86.2974	1.36311e-18	POP5, RPL30, CCNH, RPL34, POP4, SLC35B1, NUDT1, RPL8, RPL9, RPL6, RPL7, PSMD8, PCMT1, PSMD6, PSMD4, RPS19, SNRPD2, SNRPD1, MYC, PSMD3, CDC27, PSMD1, SNRPD3, RPS11, CDK5RAP3, RPS12, GABARAPL2, ALG8, RPL22, TALDO1, GTPBP4, MFSD10, EWSR1, RPL24, VDAC2, VDAC1, HPRT1, UQCRC2, LAP3, AURKAIP1, ANP32A, MRPL18, TXN, MRPL15, MRPL13, OAZ1, LDHB, ZNHIT2, RAD21, PRDX1, GAR1, HOXC8, ZNF146, BTF3, WNT10B, MTERF…	339	12619	18908	1.30832	6.84283e-16	2.28094e-16	2.21279e-16
GOTERM_MF_DIRECT	GO:0003723~RNA binding	119	34.6939	4.2796e-47	SRP19, RPL30, RPL32, RPL34, SRP14, RPL10A, RPL8, RPL9, RPL6, RPL7, FBL, RPS17, PSMD4, RPS19, SNRPD2, SNRPD1, RPL36, RPL35, RPL37, SNRPD3, RPS11, RPL39, RPS12, RPS7, RPL22, GTPBP4, THOC7, EWSR1, NCL, MRTO4, SNRPG, RPL24, SRSF3, SNRPE, SNRPF, SRSF7, SNRPB, ANP32A, PEF1, TXN, MRPL15, MRPL13, PRDX1, GAR1, BTF3, HSPA9, PA2G4, TBCA, EIF2S2, MRPL22, LSM2, LSM8, LSM7, RPL27A, HNRNPD, UBE2N, HNRNPC, ALDH1…	339	1471	18908	4.51212	2.14836e-44	2.14836e-44	2.08417e-44
GOTERM_MF_DIRECT	GO:0042802~identical protein binding	45	13.1195	0.010248	YWHAE, PEF1, CEBPG, PARK7, SRI, EGFR, PSMA7, SRM, RPL7, LDHB, PSMD4, RPS19, BTBD1, PUF60, RUVBL2, PRDX1, PCBD1, BANF1, HNRNPA1, EIF2B1, TMEM14B, NPM1, ADSL, TPM4, PRMT1, DCXR, RPL22, DYNLL1, TUBG1, PAICS, NME1, EWSR1, NCL, IMPDH2, EIF3J, HNRNPA2B1, VDAC1, ALDH18A1, SSBP1, HNRNPC, HPRT1, TARDBP, ALDOA, GAPDH, MAD2L1	339	1722	18908	1.45756	0.994321	0.2304	0.223516
GOTERM_MF_DIRECT	GO:0003735~structural constituent of ribosome	41	11.9534	1.75984e-31	MRPS15, RPL30, MRPS35, RPL32, MRPL18, RPL34, RPL12, RPL11, MRPL15, RPL10A, RPL8, MRPL13, RPL9, RPL6, RPL7, RPS4X, MRPL42, RPS17, RPS15A, RPS19, RPL36, RPS3, RPL35, RPLP2, RPL37, MRPL9, RPS27A, RPS11, RPL39, RPS12, RPS7, RPL22, MRPS2, MRPL22, RPL27A, RPL24, RPS21, RSL24D1, RPS24, RPL26L1, RPS23	339	189	18908	12.0995	8.83439e-29	4.4172e-29	4.28521e-29
GOTERM_MF_DIRECT	GO:0042803~protein homodimerization activity	20	5.8309	0.0592621	NPM1, GTF2A2, TPM4, HSPB6, ODC1, SNF8, PARK7, TXN, ELAVL1, TPD52L2, SRM, AIMP1, GGCT, LYRM4, RUVBL2, BANF1, MVD, SSBP1, TKT, MAD2L1	339	719	18908	1.55148	1	0.76281	0.740017
GOTERM_MF_DIRECT	GO:0003729~mRNA binding	18	5.24781	2.14461e-06	DAZAP1, YTHDF1, SSB, CNBP, YBX1, PARK7, EIF2S2, MRPL13, ELAVL1, HNRNPAB, RPL7, MYC, C1QBP, RPS3, RPL24, RPL35, SLIRP, LSM14A	339	245	18908	4.09781	0.00107602	0.000215319	0.000208885
GOTERM_MF_DIRECT	GO:0031625~ubiquitin protein ligase binding	16	4.66472	0.00044475	YWHAE, HSPA9, GPI, CCT2, GABARAPL2, RPL11, NEDD8, PA2G4, EGFR, LRPPRC, HSPD1, RBX1, UBE2N, PSMD1, NAE1, RPS27A	339	307	18908	2.90688	0.200136	0.0171742	0.016661
GOTERM_MF_DIRECT	GO:0045296~cadherin binding	16	4.66472	0.000598174	YWHAE, RPL34, AHSA1, PARK7, PAICS, EGFR, RPL6, LIMA1, PCMT1, PUF60, CALD1, PRDX1, RPL24, EIF3E, ALDOA, RAN	339	316	18908	2.82409	0.259458	0.0200189	0.0194207
GOTERM_MF_DIRECT	GO:0003682~chromatin binding	15	4.37318	0.0438795	NPM1, ENY2, HDAC2, NAP1L1, YBX1, SSRP1, APTX, EGFR, RAD21, CKS2, HNRNPD, SNAI2, SSBP1, HMGN3, RAN	339	469	18908	1.78387	1	0.611876	0.593593
GOTERM_MF_DIRECT	GO:0051082~unfolded protein binding	14	4.08163	6.60316e-07	HSPA9, CCT2, NPM1, HSPB6, PTGES3, HSPE1, HSPD1, NACA, RUVBL2, CCT7, PFDN4, PFDN5, CCT5, CCT4	339	131	18908	5.96077	0.000331424	8.28697e-05	8.03935e-05

## Sheet: KEGG enrichment  analysis
Category	Term	Count	%	PValue	Genes	List Total	Pop Hits	Pop Total	Fold Enrichment	Bonferroni	Benjamini	FDR
KEGG_PATHWAY	hsa01100:Metabolic pathways	47	13.7026	0.0396475	GPI, COX7B, ECHS1, UQCRB, NDUFB5, NDUFB4, ODC1, NDUFB3, NDUFB2, COX7A2, UQCR10, COX5A, HSD17B8, SRM, LDHB, DGUOK, PTDSS1, PCBD1, ATP6V0E2, NDUFV1, NDUFA8, ALG8, ATP6V0B, ADSL, PTGES3, DCXR, TALDO1, COX6C, PAICS, TRIT1, NME1, COX6B1, GGCT, SQLE, NDUFS6, IMPDH2, NDUFAB1, MVD, ALDH18A1, HAGH, UQCRC2, LAP3, HPRT1, ALDOA, TKT, GAPDH, PNPLA2	220	1541	8205	1.1375	1	1	0.940426
KEGG_PATHWAY	hsa00010:Glycolysis / Gluconeogenesis	20	3.79009	9.88521e-06	NDUFA8, COX7B, ATP6V0B, UQCRB, NDUFB5, NDUFB4, NDUFB3, EWSR1, GAPDH, HRAS, LIMA1, MAD2L1, MYC, PSMB5, PSMD14, PTTG1, RAD21, RBX1, RUVBL2, TXN	220	67	8205	2.22659	2.16712e-05	1.80595e-06	8.83832e-05
KEGG_PATHWAY	hsa00190:Oxidative phosphorylation	19	5.53936	1.39591e-08	NDUFA8, COX7B, ATP6V0B, UQCRB, NDUFB5, NDUFB4, NDUFB3, NDUFB2, COX7A2, UQCR10, COX6C, COX5A, COX6B1, NDUFS6, PPA1, NDUFAB1, UQCRC2, ATP6V0E2, NDUFV1	220	134	8205	5.28816	3.29434e-06	2.99486e-07	2.80451e-07
KEGG_PATHWAY	hsa03040:Spliceosome	18	5.24781	3.31447e-07	SF3B5, LSM2, LSM8, LSM7, SNRPD2, PUF60, SNRPD1, SNRPG, SRSF3, PPIH, SNRPA1, SNRPE, SNRPD3, SNRPF, HNRNPC, HNRNPA1, SRSF7, SNRPB	220	147	8205	4.56679	7.82184e-05	6.01704e-06	5.6346e-06
KEGG_PATHWAY	hsa04714:Thermogenesis	18	5.24781	0.000148786	NDUFA8, COX7B, UQCRB, NDUFB5, NDUFB4, NDUFB3, NDUFB2, COX7A2, UQCR10, COX6C, COX5A, COX6B1, NDUFS6, NDUFAB1, UQCRC2, HRAS, NDUFV1, PNPLA2	220	232	8205	2.89361	0.0345067	0.0021946	0.00205511
KEGG_PATHWAY	hsa04110:Cell cycle	12	3.49854	0.000560635	YWHAE, HDAC2, PTTG1, MCM7, CCNH, MYC, RAD21, CDC27, ANAPC5, E2F4, MAD2L1, RBX1	220	127	8205	3.52398	0.123963	0.00778294	0.00728826
KEGG_PATHWAY	hsa04260:Cardiac muscle contraction	9	2.62391	0.0021656	COX7B, TPM4, UQCRB, COX7A2, UQCR10, UQCRC2, COX6C, COX5A, COX6B1	220	87	8205	3.85815	0.400486	0.0283934	0.0265888
KEGG_PATHWAY	hsa03008:Ribosome biogenesis in eukaryotes	9	2.62391	0.0128296	POP5, FBL, UTP6, POP4, GAR1, NOP10, GTPBP4, WDR43, RAN	220	117	8205	2.86888	0.952517	0.159357	0.149229
KEGG_PATHWAY	hsa04723:Retrograde endocannabinoid signaling	9	2.62391	0.0443228	NDUFA8, NDUFS6, NDUFB5, NDUFB4, NDUFAB1, NDUFB3, NDUFB2, NDUFV1, GNAI1	220	148	8205	2.26797	0.999977	0.460331	0.431072
KEGG_PATHWAY	hsa04114:Oocyte meiosis	7	2.04082	0.0375937	YWHAE, PTTG1, CDC27, ANAPC5, MAD2L1, RBX1, PPP1CA	220	131	8205	1.99289	1	1	0.940426
KEGG_PATHWAY	hsa04120:Ubiquitin mediated proteolysis	7	2.04082	0.0394947	UBE2C, CDC27, UBE2N, UBA2, ANAPC5, RPS27A, RBX1	220	142	8205	1.83851	1	1	0.940426
KEGG_PATHWAY	hsa01200:Carbon metabolism	6	1.74927	0.031803	GPI, ECHS1, TALDO1, ALDOA, TKT, GAPDH	220	115	8205	1.94585	1	1	0.940426
KEGG_PATHWAY	hsa01232:Nucleotide metabolism	5	1.45773	0.0215053	DGUOK, ADSL, IMPDH2, HPRT1, NME1	220	85	8205	2.19385	1	1	0.940426
KEGG_PATHWAY	hsa03018:RNA degradation	5	1.45773	0.0398204	HSPA9, LSM8, LSM7, HSPD1, LSM2	220	79	8205	2.36047	1	1	0.940426
KEGG_PATHWAY	hsa01230:Biosynthesis of amino acids	5	1.45773	0.0398878	TALDO1, ALDH18A1, ALDOA, TKT, GAPDH	220	75	8205	2.48636	1	1	0.940426
KEGG_PATHWAY	hsa00480:Glutathione metabolism	4	1.16618	0.0444243	GGCT, ODC1, LAP3, SRM	220	57	8205	2.61722	1	1	0.940426
KEGG_PATHWAY	hsa00030:Pentose phosphate pathway	4	1.16618	0.0448627	GPI, TALDO1, ALDOA, TKT	220	30	8205	4.97273	0.99998	0.460331	0.431072
