# Supplementary material for: USP22 as a key regulator of glycolysis pathway in osteosarcoma: insights from bioinformatics and experimental approaches
Source: PeerJ. 2024 May 20;12:e17397. doi: 10.7717/peerj.17397 (PMC11114114; doi:10.7717/peerj.17397)
Supplement: Supplemental Information 3 [file peerj-12-17397-s003.xlsx]

## Sheet: Sheet1
		0h		24h		48h		72h					background correction	0h		24h		48h		72h
		NC	siUSP22	NC	siUSP22	NC	siUSP22	NC	siUSP22	siNC	siNC AVR			NC	siUSP22	NC	siUSP22	NC	siUSP22	NC	siUSP22
		0.394	0.466	0.62	0.542	1.183	0.641	1.75	1.075	0.124	0.125			0.269	0.341	0.495	0.417	1.058	0.516	1.625	0.95
		0.452	0.412	0.713	0.471	0.974	0.648	1.764	1.024	0.123	0.125			0.327	0.287	0.588	0.346	0.849	0.523	1.639	0.899
		0.458	0.444	0.648	0.499	1.037	0.777	2.096	0.978	0.113				0.333	0.319	0.523	0.374	0.912	0.652	1.971	0.853
		0.434	0.379	0.676	0.515	1.122	0.852	1.769	1.102	0.132				0.309	0.254	0.551	0.39	0.997	0.727	1.644	0.977
		0.457	0.384	0.676	0.504	0.964	0.608	1.692	0.805	0.135				0.332	0.259	0.551	0.379	0.839	0.483	1.567	0.68
		0.45	0.425	0.686	0.575	0.949	0.694	1.785	1.084	0.123				0.325	0.3	0.561	0.45	0.824	0.569	1.66	0.959
													average	0.315833	0.293333	0.544833	0.392667	0.913167	0.578333	1.68433	0.886333
													SD	0.0245146	0.0338861	0.0321274	0.03633	0.0954723	0.0934359	0.144041	0.110815
