# Supplementary material for: USP22 as a key regulator of glycolysis pathway in osteosarcoma: insights from bioinformatics and experimental approaches
Source: PeerJ. 2024 May 20;12:e17397. doi: 10.7717/peerj.17397 (PMC11114114; doi:10.7717/peerj.17397)
Supplement: Supplemental Information 5 [file peerj-12-17397-s005.xlsx]

## Sheet: Sheet1
	A2 Measurement tube	A1 Measurement tube	ΔA Measurement tube	A2 standard tube	A1 standard tube	ΔA standard tube		Dilution ratio pre-measurement	ATP content（mmol/L）	AVR	SD		normalization	AVR	SD		Relative ATP level
siNC1	0.941	0.049	0.892	0.264	0.019	0.245	0.125	10	4.55102	4.86565	0.554324		0.935337	1	0.113926
siNC2	1.2	0.044	1.156	0.264	0.019	0.245	0.125	10	5.89796				1.21216
siNC3	0.998	0.033	0.965	0.264	0.019	0.245	0.125	10	4.92347				1.01188
siNC4	0.974	0.046	0.928	0.264	0.019	0.245	0.125	10	4.73469				0.973086
siNC5	0.989	0.046	0.943	0.264	0.019	0.245	0.125	10	4.81122				0.988815
siNC6	0.884	0.046	0.838	0.264	0.019	0.245	0.125	10	4.27551				0.878714
siUSP22-1	0.575	0.029	0.546	0.264	0.019	0.245	0.125	10	2.78571	2.24065	0.383576		0.572527	0.460503	0.0788335
siUSP22-2	0.503	0.038	0.465	0.264	0.019	0.245	0.125	10	2.37245				0.487592
siUSP22-3	0.528	0.031	0.497	0.264	0.019	0.245	0.125	10	2.53571				0.521146
siUSP22-4	0.439	0.046	0.393	0.264	0.019	0.245	0.125	10	2.0051				0.412094
siUSP22-5	0.415	0.036	0.379	0.264	0.019	0.245	0.125	10	1.93367				0.397413
siUSP22-6	0.387	0.032	0.355	0.264	0.019	0.245	0.125	10	1.81122				0.372247
