# Supplementary material for: USP22 as a key regulator of glycolysis pathway in osteosarcoma: insights from bioinformatics and experimental approaches
Source: PeerJ. 2024 May 20;12:e17397. doi: 10.7717/peerj.17397 (PMC11114114; doi:10.7717/peerj.17397)
Supplement: Supplemental Information 6 [file peerj-12-17397-s006.xlsx]

## Sheet: Sheet1
	OD	control tubes	standard OD	empty OD	standard concentration	Dilution ratio pre-measurement	content（mmol/L）	AVR	SD		standardization	AVR	SD		Relative glucose uptake
siNC1	0.575	1.282	0.129	0.008	0.4	5	11.5537	10.1846	1.1467		1.13443	1	0.112592
siNC2	0.603	1.282	0.129	0.008	0.4	5	11.0909				1.08899
siNC3	0.728	1.282	0.129	0.008	0.4	5	9.02479				0.886124
siNC4	0.739	1.282	0.129	0.008	0.4	5	8.84298				0.868272
siNC5	0.615	1.282	0.129	0.008	0.4	5	10.8926				1.06952
siNC6	0.687	1.282	0.129	0.008	0.4	5	9.70248				0.952664
siUSP22-1	0.941	1.282	0.129	0.008	0.4	5	5.50413	5.39394	0.785962		0.540438	0.529619	0.0771718
siUSP22-2	0.9	1.282	0.129	0.008	0.4	5	6.18182				0.606979
siUSP22-3	0.998	1.282	0.129	0.008	0.4	5	4.56198				0.447931
siUSP22-4	0.974	1.282	0.129	0.008	0.4	5	4.95868				0.486881
siUSP22-5	0.989	1.282	0.129	0.008	0.4	5	4.71074				0.462537
siUSP22-6	0.884	1.282	0.129	0.008	0.4	5	6.44628				0.632946
