# Supplementary material for: USP22 as a key regulator of glycolysis pathway in osteosarcoma: insights from bioinformatics and experimental approaches
Source: PeerJ. 2024 May 20;12:e17397. doi: 10.7717/peerj.17397 (PMC11114114; doi:10.7717/peerj.17397)
Supplement: Supplemental Information 7 [file peerj-12-17397-s007.xlsx]

## Sheet: Sheet1
	standard OD	blank OD		ΔA AVR			OD	control tubes	ΔA	Dilution ratio pre-measurement	content（mmol/L）	AVR	SD		normalization	average	SD		Relative lactate production
0.078	0.092	0.011	0.081	0.0865		siNC1	0.812	0.011	0.801	2	3.15886	3.13759	0.290075		1.00678	1	0.0924515
	0.103	0.011	0.092			siNC2	0.698	0.011	0.687	2	2.67374				0.852163
0.15625	0.159	0.011	0.148	0.1455		siNC3	0.757	0.011	0.746	2	2.92481				0.932185
	0.154	0.011	0.143			siNC4	0.848	0.011	0.837	2	3.31206				1.05561
0.3125	0.223	0.011	0.212	0.221		siNC5	0.844	0.011	0.833	2	3.29504				1.05018
	0.241	0.011	0.23			siNC6	0.883	0.011	0.872	2	3.46101				1.10308
0.625	0.426	0.011	0.415	0.418		siUSP22-1	0.423	0.011	0.412	2	1.50347	1.47085	0.274428		0.479181	0.468782	0.0874647
	0.432	0.011	0.421			siUSP22-2	0.353	0.011	0.342	2	1.20559				0.38424
1.25	0.793	0.011	0.782	0.793		siUSP22-3	0.344	0.011	0.333	2	1.16729				0.372033
	0.815	0.011	0.804			siUSP22-4	0.424	0.011	0.413	2	1.50773				0.480537
2.5	1.416	0.011	1.405	1.435		siUSP22-5	0.523	0.011	0.512	2	1.92902				0.614811
	1.476	0.011	1.465			siUSP22-6	0.425	0.011	0.414	2	1.51198				0.481893
										p	1.29684e-06
