# Supplementary material for: USP22 as a key regulator of glycolysis pathway in osteosarcoma: insights from bioinformatics and experimental approaches
Source: PeerJ. 2024 May 20;12:e17397. doi: 10.7717/peerj.17397 (PMC11114114; doi:10.7717/peerj.17397)
Supplement: Supplemental Information 8 [file peerj-12-17397-s008.xlsx]

## Sheet: Sheet1
Saos-2
	Area 0h	Area 24h	Area Recovery（%）
si-NC	7284288	1848137	74.6284
	7412720	2137039	71.1706
	7099566	1919212	72.9672
si-USP22	7397336	4044890	45.3196
	7984617	4197454	47.4307
	7699407	4264240	44.616
