# Supplementary material for: USP22 as a key regulator of glycolysis pathway in osteosarcoma: insights from bioinformatics and experimental approaches
Source: PeerJ. 2024 May 20;12:e17397. doi: 10.7717/peerj.17397 (PMC11114114; doi:10.7717/peerj.17397)
Supplement: Supplemental Information 9 [file peerj-12-17397-s009.xlsx]

## Sheet: Sheet1
Saos-2	1	2	3
si-NC	463	340	312
si-USP22	190	165	186
