# Supplementary material for: USP22 as a key regulator of glycolysis pathway in osteosarcoma: insights from bioinformatics and experimental approaches
Source: PeerJ. 2024 May 20;12:e17397. doi: 10.7717/peerj.17397 (PMC11114114; doi:10.7717/peerj.17397)
Supplement: Supplemental Information 10 [file peerj-12-17397-s010.xlsx]

## Sheet: Sheet1
	NC	siNC	siUSP22				Group 1	Group 2
USP22-1 Grayscale value	734312	760248	192673			GLUT1-1 Grayscale value	2457493	983952
USP22-2 Grayscale value	890679	917628	287049			GLUT1-2 Grayscale value	1628912	982301
USP22-3 Grayscale value	725686	746815	137965			GLUT1-3 Grayscale value	1881310	723766
USP22-β-actin1 Grayscale value	1587643	1541713	1474096			HK2-1 Grayscale value	634004	122229
USP22-β-actin2 Grayscale value	1576999	1482853	1341482			HK2-2 Grayscale value	608349	183273
USP22-β-actin3 Grayscale value	1386590	1530157	1440110			HK2-3 Grayscale value	887965	164037
						PKM2-1 Grayscale value	948417	231178
						PKM2-2 Grayscale value	790598	320671
						PKM2-3 Grayscale value	901854	297124
						PKM2-β-actin1 Grayscale value	1538311	1595398
						PKM2-β-actin2 Grayscale value	1529732	1616442
						PKM2-β-actin3 Grayscale value	1460704	1539523
	NC	siNC	siUSP22				Group 1	Group 2
USP22-1 expression level	0.462517	0.493119	0.130706			GLUT1-1 expression level	1.59753	0.616744
USP22-2 expression level	0.564794	0.618826	0.213979			GLUT1-2 expression level	1.06483	0.607693
USP22-3 expression level	0.52336	0.488064	0.0958017			GLUT1-3 expression level	1.28795	0.470124
						HK2-1 expression level	0.412143	0.0766135
						HK2-2 expression level	0.397683	0.11338
						HK2-3 expression level	0.607902	0.106551
						PKM2-1 expression level	0.616531	0.144903
						PKM2-2 expression level	0.516821	0.198381
						PKM2-3 expression level	0.617411	0.192997
