# Supplementary material for: USP22 as a key regulator of glycolysis pathway in osteosarcoma: insights from bioinformatics and experimental approaches
Source: PeerJ. 2024 May 20;12:e17397. doi: 10.7717/peerj.17397 (PMC11114114; doi:10.7717/peerj.17397)
Supplement: Supplemental Information 15 [file peerj-12-17397-s015.xlsx]

## Sheet: Rate (Copy)
Measurement	Well	Group	Time	OCR	ECAR	PPR
1	A01	Control	1.37878	98.8531	15.8671	0
1	A02	Control	1.37878	55.4469	4.19126	0
1	A03	Control	1.37878	60.9222	5.82064	0
1	A04	Control	1.37878	145.241	6.66076	0
1	A05	Control	1.37878	83.361	18.7607	0
1	A06	Background	1.37878	0	0	0
1	B01	Control	1.37878	83.967	19.5468	0
1	B02	Control	1.37878	182.657	21.9323	0
1	B03	Control	1.37878	157.868	25.4633	0
1	B04	Control	1.37878	58.6099	21.9396	0
1	B05	Control	1.37878	155.677	36.8539	0
1	B06	Background	1.37878	0	0	0
1	C01	Experimental	1.37878	72.7443	19.314	0
1	C02	Experimental	1.37878	136.476	27.2982	0
1	C03	Experimental	1.37878	124.863	29.6007	0
1	C04	Background	1.37878	0	0	0
1	C05	Background	1.37878	0	0	0
1	C06	Background	1.37878	0	0	0
1	D01	Experimental	1.37878	78.2822	6.98422	0
1	D02	Experimental	1.37878	27.8845	18.1235	0
1	D03	Experimental	1.37878	60.0564	15.8158	0
1	D04	Background	1.37878	0	0	0
1	D05	Background	1.37878	0	0	0
1	D06	Background	1.37878	0	0	0
2	A01	Control	9.96452	95.4757	14.0182	0
2	A02	Control	9.96452	58.2697	6.57417	0
2	A03	Control	9.96452	60.9789	2.86267	0
2	A04	Control	9.96452	146.369	5.42735	0
2	A05	Control	9.96452	78.1645	12.7614	0
2	A06	Background	9.96452	0	0	0
2	B01	Control	9.96452	78.2331	16.3305	0
2	B02	Control	9.96452	180.117	27.5134	0
2	B03	Control	9.96452	148.671	28.6579	0
2	B04	Control	9.96452	55.2137	26.1986	0
2	B05	Control	9.96452	143.584	39.9877	0
2	B06	Background	9.96452	0	0	0
2	C01	Experimental	9.96452	65.3628	16.4441	0
2	C02	Experimental	9.96452	129.635	23.1059	0
2	C03	Experimental	9.96452	113.956	39.0243	0
2	C04	Background	9.96452	0	0	0
2	C05	Background	9.96452	0	0	0
2	C06	Background	9.96452	0	0	0
2	D01	Experimental	9.96452	66.7128	6.00786	0
2	D02	Experimental	9.96452	23.1766	17.6025	0
2	D03	Experimental	9.96452	54.4805	4.98286	0
2	D04	Background	9.96452	0	0	0
2	D05	Background	9.96452	0	0	0
2	D06	Background	9.96452	0	0	0
3	A01	Control	18.5196	91.9045	11.2142	0
3	A02	Control	18.5196	64.9309	5.42273	0
3	A03	Control	18.5196	61.1546	2.67651	0
3	A04	Control	18.5196	146.02	4.97154	0
3	A05	Control	18.5196	75.3131	11.4091	0
3	A06	Background	18.5196	0	0	0
3	B01	Control	18.5196	73.4292	11.1523	0
3	B02	Control	18.5196	176.653	29.5104	0
3	B03	Control	18.5196	143.084	35.2643	0
3	B04	Control	18.5196	50.5313	28.9724	0
3	B05	Control	18.5196	133.807	43.0212	0
3	B06	Background	18.5196	0	0	0
3	C01	Experimental	18.5196	58.4969	7.22977	0
3	C02	Experimental	18.5196	124.655	21.8525	0
3	C03	Experimental	18.5196	107.587	44.9248	0
3	C04	Background	18.5196	0	0	0
3	C05	Background	18.5196	0	0	0
3	C06	Background	18.5196	0	0	0
3	D01	Experimental	18.5196	61.6586	4.57134	0
3	D02	Experimental	18.5196	17.6083	16.3962	0
3	D03	Experimental	18.5196	51.4668	4.37262	0
3	D04	Background	18.5196	0	0	0
3	D05	Background	18.5196	0	0	0
3	D06	Background	18.5196	0	0	0
4	A01	Control	27.1963	94.3324	26.1958	0
4	A02	Control	27.1963	64.9135	13.8029	0
4	A03	Control	27.1963	50.6551	8.55946	0
4	A04	Control	27.1963	136.12	12.1167	0
4	A05	Control	27.1963	77.2715	18.9748	0
4	A06	Background	27.1963	0	0	0
4	B01	Control	27.1963	73.6906	11.6887	0
4	B02	Control	27.1963	156.377	18.6915	0
4	B03	Control	27.1963	131.176	21.5027	0
4	B04	Control	27.1963	40.5711	28.5981	0
4	B05	Control	27.1963	121.9	34.5612	0
4	B06	Background	27.1963	0	0	0
4	C01	Experimental	27.1963	48.9651	22.0962	0
4	C02	Experimental	27.1963	106.682	27.7534	0
4	C03	Experimental	27.1963	92.6931	23.825	0
4	C04	Background	27.1963	0	0	0
4	C05	Background	27.1963	0	0	0
4	C06	Background	27.1963	0	0	0
4	D01	Experimental	27.1963	59.504	15.2196	0
4	D02	Experimental	27.1963	15.3165	9.20863	0
4	D03	Experimental	27.1963	47.891	10.7387	0
4	D04	Background	27.1963	0	0	0
4	D05	Background	27.1963	0	0	0
4	D06	Background	27.1963	0	0	0
5	A01	Control	35.754	108.905	33.7292	0
5	A02	Control	35.754	74.6437	15.6836	0
5	A03	Control	35.754	56.2442	12.364	0
5	A04	Control	35.754	161.453	19.3078	0
5	A05	Control	35.754	84.9347	21.7279	0
5	A06	Background	35.754	0	0	0
5	B01	Control	35.754	71.5707	7.32938	0
5	B02	Control	35.754	170.018	38.9282	0
5	B03	Control	35.754	145.1	33.4563	0
5	B04	Control	35.754	42.3867	31.0938	0
5	B05	Control	35.754	124.962	48.9911	0
5	B06	Background	35.754	0	0	0
5	C01	Experimental	35.754	63.0521	25.7766	0
5	C02	Experimental	35.754	121.71	27.4571	0
5	C03	Experimental	35.754	106.924	34.0876	0
5	C04	Background	35.754	0	0	0
5	C05	Background	35.754	0	0	0
5	C06	Background	35.754	0	0	0
5	D01	Experimental	35.754	72.0458	15.6221	0
5	D02	Experimental	35.754	19.894	8.34565	0
5	D03	Experimental	35.754	57.7695	13.2192	0
5	D04	Background	35.754	0	0	0
5	D05	Background	35.754	0	0	0
5	D06	Background	35.754	0	0	0
6	A01	Control	44.3511	116.234	42.0434	0
6	A02	Control	44.3511	78.4525	18.3927	0
6	A03	Control	44.3511	60.8667	17.4467	0
6	A04	Control	44.3511	168.693	24.4175	0
6	A05	Control	44.3511	86.8662	26.425	0
6	A06	Background	44.3511	0	0	0
6	B01	Control	44.3511	67.8324	5.88015	0
6	B02	Control	44.3511	170.127	46.6831	0
6	B03	Control	44.3511	149.777	42.0143	0
6	B04	Control	44.3511	43.3092	34.6757	0
6	B05	Control	44.3511	130.653	56.4244	0
6	B06	Background	44.3511	0	0	0
6	C01	Experimental	44.3511	68.4755	29.9938	0
6	C02	Experimental	44.3511	122.704	33.9844	0
6	C03	Experimental	44.3511	111.076	40.089	0
6	C04	Background	44.3511	0	0	0
6	C05	Background	44.3511	0	0	0
6	C06	Background	44.3511	0	0	0
6	D01	Experimental	44.3511	79.8636	18.9714	0
6	D02	Experimental	44.3511	20.9344	8.9861	0
6	D03	Experimental	44.3511	61.1056	17.0003	0
6	D04	Background	44.3511	0	0	0
6	D05	Background	44.3511	0	0	0
6	D06	Background	44.3511	0	0	0
7	A01	Control	53.0006	115.409	44.7737	0
7	A02	Control	53.0006	74.335	21.1107	0
7	A03	Control	53.0006	61.5984	22.9746	0
7	A04	Control	53.0006	168.462	30.7259	0
7	A05	Control	53.0006	92.0926	37.9018	0
7	A06	Background	53.0006	0	0	0
7	B01	Control	53.0006	68.8908	4.62031	0
7	B02	Control	53.0006	162.786	48.998	0
7	B03	Control	53.0006	144.188	51.9667	0
7	B04	Control	53.0006	37.3111	39.5994	0
7	B05	Control	53.0006	132.212	69.6386	0
7	B06	Background	53.0006	0	0	0
7	C01	Experimental	53.0006	68.8541	33.8979	0
7	C02	Experimental	53.0006	121.179	45.9448	0
7	C03	Experimental	53.0006	101.648	52.9728	0
7	C04	Background	53.0006	0	0	0
7	C05	Background	53.0006	0	0	0
7	C06	Background	53.0006	0	0	0
7	D01	Experimental	53.0006	80.3022	26.2857	0
7	D02	Experimental	53.0006	11.4014	16.6726	0
7	D03	Experimental	53.0006	54.9192	24.7401	0
7	D04	Background	53.0006	0	0	0
7	D05	Background	53.0006	0	0	0
7	D06	Background	53.0006	0	0	0
8	A01	Control	61.5561	109.106	39.1446	0
8	A02	Control	61.5561	75.0709	25.707	0
8	A03	Control	61.5561	63.3224	18.8524	0
8	A04	Control	61.5561	170.268	29.0841	0
8	A05	Control	61.5561	87.9194	37.4672	0
8	A06	Background	61.5561	0	0	0
8	B01	Control	61.5561	64.6427	3.80433	0
8	B02	Control	61.5561	163.538	49.0551	0
8	B03	Control	61.5561	148.361	54.3084	0
8	B04	Control	61.5561	40.2758	40.101	0
8	B05	Control	61.5561	135.332	70.1367	0
8	B06	Background	61.5561	0	0	0
8	C01	Experimental	61.5561	68.6578	36.5529	0
8	C02	Experimental	61.5561	124.793	45.2796	0
8	C03	Experimental	61.5561	106.925	50.8323	0
8	C04	Background	61.5561	0	0	0
8	C05	Background	61.5561	0	0	0
8	C06	Background	61.5561	0	0	0
8	D01	Experimental	61.5561	80.0777	27.1447	0
8	D02	Experimental	61.5561	9.32816	17.7915	0
8	D03	Experimental	61.5561	55.6065	26.7239	0
8	D04	Background	61.5561	0	0	0
8	D05	Background	61.5561	0	0	0
8	D06	Background	61.5561	0	0	0
9	A01	Control	70.1083	107.011	32.8185	0
9	A02	Control	70.1083	69.2474	14.4622	0
9	A03	Control	70.1083	58.4054	15.3884	0
9	A04	Control	70.1083	160.969	22.533	0
9	A05	Control	70.1083	79.7637	25.2571	0
9	A06	Background	70.1083	0	0	0
9	B01	Control	70.1083	61.4462	4.33243	0
9	B02	Control	70.1083	164.924	52.9917	0
9	B03	Control	70.1083	151.321	53.0854	0
9	B04	Control	70.1083	41.1341	40.1842	0
9	B05	Control	70.1083	137.212	68.966	0
9	B06	Background	70.1083	0	0	0
9	C01	Experimental	70.1083	68.749	37.4108	0
9	C02	Experimental	70.1083	125.088	45.7851	0
9	C03	Experimental	70.1083	111.733	50.0256	0
9	C04	Background	70.1083	0	0	0
9	C05	Background	70.1083	0	0	0
9	C06	Background	70.1083	0	0	0
9	D01	Experimental	70.1083	70.8053	11.8522	0
9	D02	Experimental	70.1083	3.68525	16.1436	0
9	D03	Experimental	70.1083	52.6769	26.6518	0
9	D04	Background	70.1083	0	0	0
9	D05	Background	70.1083	0	0	0
9	D06	Background	70.1083	0	0	0
10	A01	Control	78.8072	107.124	37.3483	0
10	A02	Control	78.8072	63.2891	8.68003	0
10	A03	Control	78.8072	54.4535	8.80832	0
10	A04	Control	78.8072	150.845	19.6363	0
10	A05	Control	78.8072	85.8882	27.3862	0
10	A06	Background	78.8072	0	0	0
10	B01	Control	78.8072	58.4182	4.07166	0
10	B02	Control	78.8072	139.145	14.184	0
10	B03	Control	78.8072	138.649	23.8211	0
10	B04	Control	78.8072	35.66	41.1005	0
10	B05	Control	78.8072	134.29	58.3343	0
10	B06	Background	78.8072	0	0	0
10	C01	Experimental	78.8072	60.6364	32.0648	0
10	C02	Experimental	78.8072	111.437	22.2642	0
10	C03	Experimental	78.8072	92.365	26.1806	0
10	C04	Background	78.8072	0	0	0
10	C05	Background	78.8072	0	0	0
10	C06	Background	78.8072	0	0	0
10	D01	Experimental	78.8072	67.5353	13.1157	0
10	D02	Experimental	78.8072	6.78318	14.2515	0
10	D03	Experimental	78.8072	46.7063	14.4522	0
10	D04	Background	78.8072	0	0	0
10	D05	Background	78.8072	0	0	0
10	D06	Background	78.8072	0	0	0
11	A01	Control	87.3648	113.965	42.4731	0
11	A02	Control	87.3648	67.9649	9.26394	0
11	A03	Control	87.3648	52.5862	7.58382	0
11	A04	Control	87.3648	159.222	18.2131	0
11	A05	Control	87.3648	88.9271	27.4562	0
11	A06	Background	87.3648	0	0	0
11	B01	Control	87.3648	51.8562	2.48955	0
11	B02	Control	87.3648	150.461	19.7694	0
11	B03	Control	87.3648	143.905	31.1304	0
11	B04	Control	87.3648	37.7226	42.4299	0
11	B05	Control	87.3648	130.427	57.289	0
11	B06	Background	87.3648	0	0	0
11	C01	Experimental	87.3648	65.9527	31.49	0
11	C02	Experimental	87.3648	119.242	28.5007	0
11	C03	Experimental	87.3648	103.22	32.6148	0
11	C04	Background	87.3648	0	0	0
11	C05	Background	87.3648	0	0	0
11	C06	Background	87.3648	0	0	0
11	D01	Experimental	87.3648	76.0929	16.7129	0
11	D02	Experimental	87.3648	11.0119	10.8857	0
11	D03	Experimental	87.3648	50.8525	15.1877	0
11	D04	Background	87.3648	0	0	0
11	D05	Background	87.3648	0	0	0
11	D06	Background	87.3648	0	0	0
12	A01	Control	95.9313	108.705	33.6135	0
12	A02	Control	95.9313	57.5479	3.71154	0
12	A03	Control	95.9313	57.5897	7.48812	0
12	A04	Control	95.9313	151.359	14.2193	0
12	A05	Control	95.9313	81.3271	25.5398	0
12	A06	Background	95.9313	0	0	0
12	B01	Control	95.9313	49.9463	3.42526	0
12	B02	Control	95.9313	153.928	22.2282	0
12	B03	Control	95.9313	146.264	32.012	0
12	B04	Control	95.9313	39.509	41.9537	0
12	B05	Control	95.9313	130.875	56.2685	0
12	B06	Background	95.9313	0	0	0
12	C01	Experimental	95.9313	66.8255	29.1641	0
12	C02	Experimental	95.9313	121.184	32.1398	0
12	C03	Experimental	95.9313	104.851	34.1147	0
12	C04	Background	95.9313	0	0	0
12	C05	Background	95.9313	0	0	0
12	C06	Background	95.9313	0	0	0
12	D01	Experimental	95.9313	79.5526	21.7743	0
12	D02	Experimental	95.9313	4.61836	12.3517	0
12	D03	Experimental	95.9313	49.7381	15.711	0
12	D04	Background	95.9313	0	0	0
12	D05	Background	95.9313	0	0	0
12	D06	Background	95.9313	0	0	0

## Sheet: L-Normalized Rate (copy)
Measurement	Well	Group	Time	OCR	ECAR	PPR					Cycles	Value		Group Name	Selected?		Error Type
1	A01	Background	1.33459	0	0	0					Basal	3		MCF7-10k GST	TRUE		Standard Deviation	TRUE	FALSE
1	A02	Unassigned	1.33459	1.17418	-2.14961	-3.82287					Injection A	3		MCF7-15k GST	TRUE
1	A03	Unassigned	1.33459	-11.0597	1.12105	1.99368					Injection B	3		MCF7-20k GST	TRUE
1	A04	Unassigned	1.33459	0.702111	-3.82161	-6.79635					Injection C	3
1	A05	Unassigned	1.33459	3.80489	-3.71097	-6.59959					Injection D	0
1	A06	Unassigned	1.33459	-6.48159	-1.06634	-1.89637
1	A07	Unassigned	1.33459	-8.95792	4.46445	7.93957
1	A08	Unassigned	1.33459	-0.189421	-1.96588	-3.49612
1	A09	Unassigned	1.33459	-4.80398	0.998797	1.77626
1	A10	Unassigned	1.33459	-0.819074	-0.17733	-0.315364
1	A11	Unassigned	1.33459	-1.45885	-2.63546	-4.68691
1	A12	Background	1.33459	0	0	0
1	B01	Outliers	1.33459	37.2155	20.8014	36.9932
1	B02	Outliers	1.33459	53.9835	32.6745	58.1082
1	B03	Outliers	1.33459	47.2024	29.3277	52.1563
1	B04	Outliers	1.33459	70.5421	36.4213	64.7717
1	B05	Outliers	1.33459	96.9704	49.5344	88.092
1	B06	Outliers	1.33459	93.6853	41.1979	73.2664
1	B07	Outliers	1.33459	104.078	56.7123	100.857
1	B08	Outliers	1.33459	100.646	57.1341	101.607
1	B09	Outliers	1.33459	155.52	65.623	116.704
1	B10	Outliers	1.33459	152.575	65.6064	116.674
1	B11	Outliers	1.33459	124.576	49.7416	88.4604
1	B12	Outliers	1.33459	144.506	57.2296	101.777
1	C01	Outliers	1.33459	38.1282	23.1123	41.103
1	C02	Outliers	1.33459	48.7611	24.9371	44.3481
1	C03	Outliers	1.33459	62.9866	37.6734	66.9984
1	C04	Outliers	1.33459	70.6578	43.6803	77.681
1	C05	Outliers	1.33459	88.6822	45.5744	81.0495
1	C06	Outliers	1.33459	91.5547	53.8753	95.8118
1	C07	Outliers	1.33459	103.798	58.6152	104.241
1	C08	Outliers	1.33459	105.765	60.6524	107.864
1	C09	Outliers	1.33459	140.594	62.5712	111.277
1	C10	Outliers	1.33459	119.269	49.3271	87.7233
1	C11	Outliers	1.33459	119.445	54.2935	96.5555
1	C12	Outliers	1.33459	141.437	48.7574	86.7102
1	D01	Outliers	1.33459	42.5502	27.991	49.7791
1	D02	Outliers	1.33459	52.5614	37.6497	66.9562
1	D03	Outliers	1.33459	48.763	30.9105	54.9712
1	D04	Outliers	1.33459	59.3228	32.2047	57.2728
1	D05	Outliers	1.33459	84.9567	48.7394	86.6782
1	D06	Outliers	1.33459	109.488	51.958	92.4022
1	D07	Outliers	1.33459	102.309	53.8805	95.8211
1	D08	Outliers	1.33459	90.3463	56.383	100.272
1	D09	Outliers	1.33459	128.98	56.1018	99.7715
1	D10	Outliers	1.33459	119.866	46.7588	83.1559
1	D11	Outliers	1.33459	113.279	42.3034	75.2323
1	D12	Outliers	1.33459	113.439	38.2107	67.9539
1	E01	MCF7-10k GST	1.33459	36.0986	7.50494	13.3468
1	E02	MCF7-10k GST	1.33459	47.714	14.9793	26.6391
1	E03	MCF7-10k GST	1.33459	56.2454	14.5623	25.8976
1	E04	MCF7-10k GST	1.33459	65.3626	17.3947	30.9347
1	E05	MCF7-15k GST	1.33459	70.141	25.4049	45.1801
1	E06	MCF7-15k GST	1.33459	92.552	18.5964	33.0719
1	E07	MCF7-15k GST	1.33459	112.167	24.3102	43.2332
1	E08	MCF7-15k GST	1.33459	100.485	37.6394	66.9379
1	E09	MCF7-20k GST	1.33459	108.899	23.5716	41.9197
1	E10	MCF7-20k GST	1.33459	96.6987	8.44567	15.0198
1	E11	MCF7-20k GST	1.33459	115.658	22.592	40.1776
1	E12	MCF7-20k GST	1.33459	96.7515	22.6715	40.319
1	F01	MCF7-10k GST	1.33459	42.7194	-6.27939	-11.1673
1	F02	MCF7-10k GST	1.33459	60.8639	21.1553	37.6226
1	F03	MCF7-10k GST	1.33459	58.2449	16.0443	28.5331
1	F04	MCF7-10k GST	1.33459	73.0289	16.6243	29.5647
1	F05	MCF7-15k GST	1.33459	100.298	24.1968	43.0316
1	F06	MCF7-15k GST	1.33459	106.072	19.703	35.0399
1	F07	MCF7-15k GST	1.33459	114.15	26.0631	46.3506
1	F08	MCF7-15k GST	1.33459	110.246	30.0569	53.4532
1	F09	MCF7-20k GST	1.33459	86.7507	23.2808	41.4026
1	F10	MCF7-20k GST	1.33459	83.6702	14.9671	26.6175
1	F11	MCF7-20k GST	1.33459	113.821	16.8599	29.9836
1	F12	MCF7-20k GST	1.33459	100.107	14.6399	26.0356
1	G01	MCF7-10k GST	1.33459	71.8371	4.41562	7.85273
1	G02	MCF7-10k GST	1.33459	59.4037	6.14275	10.9243
1	G03	MCF7-10k GST	1.33459	52.8125	14.1246	25.1192
1	G04	MCF7-10k GST	1.33459	83.478	16.7864	29.853
1	G05	MCF7-15k GST	1.33459	74.1871	24.4894	43.552
1	G06	MCF7-15k GST	1.33459	108.094	27.5726	49.0351
1	G07	MCF7-15k GST	1.33459	93.9953	12.8529	22.8576
1	G08	MCF7-15k GST	1.33459	99.6686	24.3572	43.3169
1	G09	MCF7-20k GST	1.33459	85.4103	23.8595	42.4317
1	G10	MCF7-20k GST	1.33459	88.8251	17.5838	31.2711
1	G11	MCF7-20k GST	1.33459	88.1359	24.8819	44.2499
1	G12	MCF7-20k GST	1.33459	94.7998	17.0369	30.2983
1	H01	Background	1.33459	0	0	0
1	H02	Unassigned	1.33459	3.80764	-2.32958	-4.14293
1	H03	Unassigned	1.33459	8.36391	0.120408	0.214133
1	H04	Unassigned	1.33459	2.83209	3.3021	5.87245
1	H05	Unassigned	1.33459	-1.05259	2.56639	4.56407
1	H06	Unassigned	1.33459	-3.12704	7.39778	13.1562
1	H07	Unassigned	1.33459	0.695971	3.38251	6.01545
1	H08	Unassigned	1.33459	2.35841	0.26206	0.466048
1	H09	Unassigned	1.33459	-10.7432	2.38875	4.24816
1	H10	Unassigned	1.33459	2.14963	-2.92142	-5.19545
1	H11	Unassigned	1.33459	-7.45345	1.07581	1.91323
1	H12	Background	1.33459	0	0	0
2	A01	Background	7.88222	0	0	0
2	A02	Unassigned	7.88222	0.601182	-5.37171	-9.55305
2	A03	Unassigned	7.88222	-11.9209	2.90308	5.16284
2	A04	Unassigned	7.88222	2.89176	-5.31882	-9.45899
2	A05	Unassigned	7.88222	5.09008	-2.57925	-4.58693
2	A06	Unassigned	7.88222	-3.27	-3.69023	-6.56271
2	A07	Unassigned	7.88222	-0.816925	2.63046	4.67801
2	A08	Unassigned	7.88222	1.90296	-5.3836	-9.57419
2	A09	Unassigned	7.88222	-3.56348	-1.74912	-3.11063
2	A10	Unassigned	7.88222	-0.438798	-1.18294	-2.10374
2	A11	Unassigned	7.88222	-1.96244	-4.7543	-8.45505
2	A12	Background	7.88222	0	0	0
2	B01	Outliers	7.88222	36.0268	17.5162	31.1509
2	B02	Outliers	7.88222	51.8922	27.2063	48.3837
2	B03	Outliers	7.88222	41.2496	24.0904	42.8424
2	B04	Outliers	7.88222	65.1754	29.9718	53.3019
2	B05	Outliers	7.88222	89.8815	46.4679	82.6385
2	B06	Outliers	7.88222	88.7307	36.0152	64.0495
2	B07	Outliers	7.88222	97.8742	47.8522	85.1003
2	B08	Outliers	7.88222	92.8186	55.3777	98.4837
2	B09	Outliers	7.88222	143.866	58.5649	104.152
2	B10	Outliers	7.88222	143.178	59.8273	106.397
2	B11	Outliers	7.88222	117.393	40.7888	72.5388
2	B12	Outliers	7.88222	139.946	50.6573	90.0889
2	C01	Outliers	7.88222	36.3504	20.9377	37.2356
2	C02	Outliers	7.88222	46.4258	21.3128	37.9027
2	C03	Outliers	7.88222	57.2886	35.3827	62.9247
2	C04	Outliers	7.88222	65.3531	40.1793	71.4548
2	C05	Outliers	7.88222	83.2317	42.5982	75.7566
2	C06	Outliers	7.88222	89.3306	50.927	90.5685
2	C07	Outliers	7.88222	99.5593	51.3441	91.3103
2	C08	Outliers	7.88222	97.2864	57.1399	101.618
2	C09	Outliers	7.88222	130.771	55.3628	98.4572
2	C10	Outliers	7.88222	111.772	42.8188	76.149
2	C11	Outliers	7.88222	111.563	53.2863	94.7644
2	C12	Outliers	7.88222	133.116	43.1658	76.766
2	D01	Outliers	7.88222	39.0052	30.2254	53.7528
2	D02	Outliers	7.88222	51.2135	34.4066	61.1887
2	D03	Outliers	7.88222	48.7656	26.7721	47.6116
2	D04	Outliers	7.88222	55.2201	22.6113	40.2119
2	D05	Outliers	7.88222	79.1525	38.0908	67.7407
2	D06	Outliers	7.88222	101.55	41.0205	72.9509
2	D07	Outliers	7.88222	95.694	54.0994	96.2104
2	D08	Outliers	7.88222	91.8385	52.2312	92.888
2	D09	Outliers	7.88222	119.739	48.734	86.6686
2	D10	Outliers	7.88222	112.033	41.8523	74.4301
2	D11	Outliers	7.88222	96.3819	29.175	51.8848
2	D12	Outliers	7.88222	108.875	32.1274	57.1353
2	E01	MCF7-10k GST	7.88222	36.1226	4.09062	7.27476
2	E02	MCF7-10k GST	7.88222	47.5579	6.92249	12.311
2	E03	MCF7-10k GST	7.88222	55.0231	5.3717	9.55302
2	E04	MCF7-10k GST	7.88222	64.089	11.2208	19.9551
2	E05	MCF7-15k GST	7.88222	67.6434	21.4379	38.1251
2	E06	MCF7-15k GST	7.88222	92.4068	14.7305	26.1967
2	E07	MCF7-15k GST	7.88222	109.223	21.4181	38.0899
2	E08	MCF7-15k GST	7.88222	104.007	20.957	37.2699
2	E09	MCF7-20k GST	7.88222	105.781	17.2722	30.7169
2	E10	MCF7-20k GST	7.88222	93.2857	3.59549	6.39422
2	E11	MCF7-20k GST	7.88222	112.551	18.9117	33.6325
2	E12	MCF7-20k GST	7.88222	91.0833	13.8805	24.6851
2	F01	MCF7-10k GST	7.88222	43.3026	-1.75636	-3.12351
2	F02	MCF7-10k GST	7.88222	61.3291	12.7188	22.6191
2	F03	MCF7-10k GST	7.88222	57.4076	8.94768	15.9125
2	F04	MCF7-10k GST	7.88222	69.9522	15.5983	27.74
2	F05	MCF7-15k GST	7.88222	92.5307	23.523	41.8333
2	F06	MCF7-15k GST	7.88222	98.4623	16.5721	29.4718
2	F07	MCF7-15k GST	7.88222	110.062	23.557	41.8939
2	F08	MCF7-15k GST	7.88222	104.618	27.2006	48.3735
2	F09	MCF7-20k GST	7.88222	83.9163	15.8945	28.2667
2	F10	MCF7-20k GST	7.88222	81.6463	8.74015	15.5435
2	F11	MCF7-20k GST	7.88222	112.523	10.4754	18.6294
2	F12	MCF7-20k GST	7.88222	102.439	11.9014	21.1655
2	G01	MCF7-10k GST	7.88222	74.4283	1.59756	2.8411
2	G02	MCF7-10k GST	7.88222	61.6243	2.76652	4.91997
2	G03	MCF7-10k GST	7.88222	48.6754	6.19147	11.0109
2	G04	MCF7-10k GST	7.88222	78.0371	15.3154	27.2368
2	G05	MCF7-15k GST	7.88222	64.9223	15.2118	27.0527
2	G06	MCF7-15k GST	7.88222	101.231	19.029	33.8413
2	G07	MCF7-15k GST	7.88222	88.4713	7.67533	13.6498
2	G08	MCF7-15k GST	7.88222	96.9502	12.678	22.5466
2	G09	MCF7-20k GST	7.88222	82.9383	15.1769	26.9906
2	G10	MCF7-20k GST	7.88222	88.4199	13.1964	23.4686
2	G11	MCF7-20k GST	7.88222	84.042	19.5734	34.8093
2	G12	MCF7-20k GST	7.88222	91.349	9.73023	17.3042
2	H01	Background	7.88222	0	0	0
2	H02	Unassigned	7.88222	5.68524	-4.05741	-7.2157
2	H03	Unassigned	7.88222	7.44049	-2.33933	-4.16027
2	H04	Unassigned	7.88222	2.52448	1.17306	2.08617
2	H05	Unassigned	7.88222	3.36136	-0.403297	-0.717224
2	H06	Unassigned	7.88222	-2.35156	-0.806632	-1.43452
2	H07	Unassigned	7.88222	0.486179	2.1315	3.79066
2	H08	Unassigned	7.88222	2.32335	-0.177177	-0.315091
2	H09	Unassigned	7.88222	-9.76013	-2.68727	-4.77905
2	H10	Unassigned	7.88222	3.14765	-4.70269	-8.36327
2	H11	Unassigned	7.88222	-3.29143	-0.924099	-1.64342
2	H12	Background	7.88222	0	0	0
3	A01	Background	14.3932	0	0	0
3	A02	Unassigned	14.3932	1.2195	-4.19081	-7.45293
3	A03	Unassigned	14.3932	-11.9283	3.38209	6.01472
3	A04	Unassigned	14.3932	3.19228	-2.73089	-4.85662
3	A05	Unassigned	14.3932	4.8362	-1.6283	-2.89576
3	A06	Unassigned	14.3932	-0.58513	-1.48788	-2.64605
3	A07	Unassigned	14.3932	1.66004	1.97453	3.5115
3	A08	Unassigned	14.3932	1.87852	-4.19285	-7.45657
3	A09	Unassigned	14.3932	-2.91354	-0.587793	-1.04533
3	A10	Unassigned	14.3932	-1.83235	-0.925409	-1.64575
3	A11	Unassigned	14.3932	-0.00220261	-2.49017	-4.42852
3	A12	Background	14.3932	0	0	0
3	B01	Outliers	14.3932	34.1249	18.3582	32.6482
3	B02	Outliers	14.3932	49.7478	28.5537	50.7799
3	B03	Outliers	14.3932	40.6056	25.7126	45.7273
3	B04	Outliers	14.3932	62.5512	31.9798	56.8729
3	B05	Outliers	14.3932	87.8633	50.1517	89.1898
3	B06	Outliers	14.3932	87.3881	39.7523	70.6954
3	B07	Outliers	14.3932	95.5043	50.8649	90.4581
3	B08	Outliers	14.3932	89.4216	57.8984	102.967
3	B09	Outliers	14.3932	140.696	61.7734	109.858
3	B10	Outliers	14.3932	139.3	61.8767	110.041
3	B11	Outliers	14.3932	115.906	43.2747	76.9597
3	B12	Outliers	14.3932	138.165	53.8635	95.7909
3	C01	Outliers	14.3932	35.5456	21.3986	38.0553
3	C02	Outliers	14.3932	47.0014	23.1055	41.0909
3	C03	Outliers	14.3932	55.4607	35.2853	62.7513
3	C04	Outliers	14.3932	63.7548	41.311	73.4674
3	C05	Outliers	14.3932	81.1047	43.8855	78.046
3	C06	Outliers	14.3932	86.6108	53.1276	94.4822
3	C07	Outliers	14.3932	97.9119	55.0025	97.8165
3	C08	Outliers	14.3932	96.6855	59.3944	105.627
3	C09	Outliers	14.3932	129.363	57.7427	102.69
3	C10	Outliers	14.3932	108.915	45.4836	80.8879
3	C11	Outliers	14.3932	109.937	55.3443	98.4242
3	C12	Outliers	14.3932	130.151	44.4861	79.1141
3	D01	Outliers	14.3932	39.8376	29.0348	51.6355
3	D02	Outliers	14.3932	50.5435	31.7181	56.4075
3	D03	Outliers	14.3932	48.8215	30.0913	53.5143
3	D04	Outliers	14.3932	53.3865	25.1739	44.7693
3	D05	Outliers	14.3932	76.9389	41.2872	73.4251
3	D06	Outliers	14.3932	97.7833	44.8575	79.7745
3	D07	Outliers	14.3932	93.2019	55.708	99.071
3	D08	Outliers	14.3932	86.1856	54.0229	96.0743
3	D09	Outliers	14.3932	116.737	50.2958	89.446
3	D10	Outliers	14.3932	108.236	43.4927	77.3475
3	D11	Outliers	14.3932	93.6853	30.2237	53.7498
3	D12	Outliers	14.3932	107.197	31.7973	56.5484
3	E01	MCF7-10k GST	14.3932	34.8173	6.28014	11.1686
3	E02	MCF7-10k GST	14.3932	46.9569	6.06317	10.7827
3	E03	MCF7-10k GST	14.3932	54.5693	7.56749	13.458
3	E04	MCF7-10k GST	14.3932	63.7771	12.0835	21.4892
3	E05	MCF7-15k GST	14.3932	64.3343	22.0717	39.2523
3	E06	MCF7-15k GST	14.3932	92.3021	12.72	22.6213
3	E07	MCF7-15k GST	14.3932	107.863	22.2586	39.5847
3	E08	MCF7-15k GST	14.3932	101.24	17.9359	31.8972
3	E09	MCF7-20k GST	14.3932	103.932	16.7871	29.8543
3	E10	MCF7-20k GST	14.3932	91.8163	5.22586	9.29366
3	E11	MCF7-20k GST	14.3932	110.21	18.8669	33.5529
3	E12	MCF7-20k GST	14.3932	87.5256	14.4141	25.634
3	F01	MCF7-10k GST	14.3932	42.2749	2.65762	4.72631
3	F02	MCF7-10k GST	14.3932	60.9198	12.8437	22.8412
3	F03	MCF7-10k GST	14.3932	56.5034	8.13373	14.465
3	F04	MCF7-10k GST	14.3932	68.1719	16.5335	29.4032
3	F05	MCF7-15k GST	14.3932	89.4166	23.4945	41.7826
3	F06	MCF7-15k GST	14.3932	98.1224	16.9329	30.1134
3	F07	MCF7-15k GST	14.3932	109.177	23.9249	42.548
3	F08	MCF7-15k GST	14.3932	104.57	27.2164	48.4017
3	F09	MCF7-20k GST	14.3932	82.9068	16.5223	29.3832
3	F10	MCF7-20k GST	14.3932	79.9402	7.1377	12.6937
3	F11	MCF7-20k GST	14.3932	111.767	10.6158	18.8792
3	F12	MCF7-20k GST	14.3932	92.9563	13.7184	24.3968
3	G01	MCF7-10k GST	14.3932	71.3546	4.17266	7.42065
3	G02	MCF7-10k GST	14.3932	57.7385	1.54631	2.74996
3	G03	MCF7-10k GST	14.3932	49.2152	6.96818	12.3922
3	G04	MCF7-10k GST	14.3932	76.6322	14.957	26.5996
3	G05	MCF7-15k GST	14.3932	61.1736	16.2441	28.8884
3	G06	MCF7-15k GST	14.3932	98.5519	20.876	37.126
3	G07	MCF7-15k GST	14.3932	84.6824	8.66303	15.4063
3	G08	MCF7-15k GST	14.3932	94.4927	15.6802	27.8856
3	G09	MCF7-20k GST	14.3932	82.4594	16.45	29.2548
3	G10	MCF7-20k GST	14.3932	86.8428	13.5195	24.0431
3	G11	MCF7-20k GST	14.3932	83.4165	19.7986	35.2098
3	G12	MCF7-20k GST	14.3932	89.6167	13.5702	24.1332
3	H01	Background	14.3932	0	0	0
3	H02	Unassigned	14.3932	6.19582	-2.09894	-3.73276
3	H03	Unassigned	14.3932	8.0381	-1.57306	-2.79754
3	H04	Unassigned	14.3932	2.50363	1.82466	3.24497
3	H05	Unassigned	14.3932	3.7766	-0.896291	-1.59396
3	H06	Unassigned	14.3932	-2.3759	-0.304031	-0.540689
3	H07	Unassigned	14.3932	0.0249963	2.958	5.26051
3	H08	Unassigned	14.3932	2.29406	-0.373824	-0.664808
3	H09	Unassigned	14.3932	-9.78611	0.532427	0.946868
3	H10	Unassigned	14.3932	-0.132119	-3.93155	-6.99188
3	H11	Unassigned	14.3932	-1.87025	0.711926	1.26609
3	H12	Background	14.3932	0	0	0
4	A01	Background	21.0442	0	0	0
4	A02	Unassigned	21.0442	1.85847	-6.27123	-11.1528
4	A03	Unassigned	21.0442	-8.18377	1.92653	3.42615
4	A04	Unassigned	21.0442	10.7413	-3.87429	-6.89005
4	A05	Unassigned	21.0442	4.16394	-2.5885	-4.60338
4	A06	Unassigned	21.0442	5.76845	-3.63087	-6.45715
4	A07	Unassigned	21.0442	2.9097	0.946995	1.68414
4	A08	Unassigned	21.0442	-3.74757	-4.47542	-7.95909
4	A09	Unassigned	21.0442	-7.37621	-0.0568946	-0.101181
4	A10	Unassigned	21.0442	-2.23509	-0.885946	-1.57557
4	A11	Unassigned	21.0442	-4.33176	-3.83402	-6.81843
4	A12	Background	21.0442	0	0	0
4	B01	Outliers	21.0442	16.982	25.8563	45.9829
4	B02	Outliers	21.0442	23.9304	40.7676	72.5011
4	B03	Outliers	21.0442	11.0018	37.1137	66.0029
4	B04	Outliers	21.0442	19.0836	45.0874	80.1834
4	B05	Outliers	21.0442	38.4983	69.0673	122.829
4	B06	Outliers	21.0442	37.2663	60.4955	107.585
4	B07	Outliers	21.0442	41.6166	68.5694	121.944
4	B08	Outliers	21.0442	39.1083	75.2364	133.8
4	B09	Outliers	21.0442	60.7838	85.9074	152.778
4	B10	Outliers	21.0442	56.9625	87.4454	155.513
4	B11	Outliers	21.0442	49.4558	61.5468	109.455
4	B12	Outliers	21.0442	60.9291	70.6301	125.609
4	C01	Outliers	21.0442	16.4182	29.1316	51.8076
4	C02	Outliers	21.0442	24.411	28.4404	50.5784
4	C03	Outliers	21.0442	25.1186	48.4255	86.1198
4	C04	Outliers	21.0442	-12.7517	55.246	98.2495
4	C05	Outliers	21.0442	23.4356	60.9181	108.337
4	C06	Outliers	21.0442	34.1531	72.3539	128.674
4	C07	Outliers	21.0442	38.4842	75.385	134.065
4	C08	Outliers	21.0442	44.8568	79.1418	140.746
4	C09	Outliers	21.0442	64.1886	82.4786	146.68
4	C10	Outliers	21.0442	47.9735	68.3917	121.628
4	C11	Outliers	21.0442	50.0825	73.4731	130.665
4	C12	Outliers	21.0442	56.5625	64.5093	114.723
4	D01	Outliers	21.0442	20.1832	39.0068	69.3696
4	D02	Outliers	21.0442	18.629	42.0087	74.7083
4	D03	Outliers	21.0442	17.4927	35.3347	62.8393
4	D04	Outliers	21.0442	22.8024	34.1629	60.7553
4	D05	Outliers	21.0442	27.9483	54.6812	97.2451
4	D06	Outliers	21.0442	42.8724	68.2234	121.328
4	D07	Outliers	21.0442	35.37	77.0224	136.977
4	D08	Outliers	21.0442	30.3081	72.0831	128.193
4	D09	Outliers	21.0442	52.0789	76.3994	135.869
4	D10	Outliers	21.0442	48.6219	62.3901	110.955
4	D11	Outliers	21.0442	36.003	47.968	85.3063
4	D12	Outliers	21.0442	50.6072	49.647	88.2922
4	E01	MCF7-10k GST	21.0442	33.2914	17.0098	30.2503
4	E02	MCF7-10k GST	21.0442	42.1714	25.3822	45.1397
4	E03	MCF7-10k GST	21.0442	53.4149	22.4066	39.8479
4	E04	MCF7-10k GST	21.0442	55.1704	34.6819	61.6783
4	E05	MCF7-15k GST	21.0442	39.5642	50.6349	90.0492
4	E06	MCF7-15k GST	21.0442	115.711	44.4838	79.11
4	E07	MCF7-15k GST	21.0442	96.1986	53.3202	94.8246
4	E08	MCF7-15k GST	21.0442	92.7076	45.5493	81.0048
4	E09	MCF7-20k GST	21.0442	104.493	42.7306	75.9922
4	E10	MCF7-20k GST	21.0442	89.9624	28.7324	51.0976
4	E11	MCF7-20k GST	21.0442	100.32	48.3153	85.924
4	E12	MCF7-20k GST	21.0442	86.0697	40.445	71.9274
4	F01	MCF7-10k GST	21.0442	46.4341	10.0346	17.8455
4	F02	MCF7-10k GST	21.0442	56.1649	37.4886	66.6698
4	F03	MCF7-10k GST	21.0442	52.6097	26.5566	47.2282
4	F04	MCF7-10k GST	21.0442	63.139	38.7326	68.882
4	F05	MCF7-15k GST	21.0442	79.9017	47.1794	83.9038
4	F06	MCF7-15k GST	21.0442	96.4076	47.7701	84.9544
4	F07	MCF7-15k GST	21.0442	102.156	54.2927	96.5542
4	F08	MCF7-15k GST	21.0442	102.256	52.1404	92.7265
4	F09	MCF7-20k GST	21.0442	72.2819	40.8329	72.6172
4	F10	MCF7-20k GST	21.0442	81.8676	30.8703	54.8998
4	F11	MCF7-20k GST	21.0442	97.3712	42.4566	75.5049
4	F12	MCF7-20k GST	21.0442	86.1835	35.5682	63.2545
4	G01	MCF7-10k GST	21.0442	71.5242	21.2059	37.7126
4	G02	MCF7-10k GST	21.0442	53.5805	17.0524	30.326
4	G03	MCF7-10k GST	21.0442	48.2429	23.9546	42.6008
4	G04	MCF7-10k GST	21.0442	71.8769	39.4447	70.1484
4	G05	MCF7-15k GST	21.0442	57.508	40.8009	72.5604
4	G06	MCF7-15k GST	21.0442	189.375	54.5751	97.0563
4	G07	MCF7-15k GST	21.0442	78.33	31.7779	56.5138
4	G08	MCF7-15k GST	21.0442	89.9036	44.9301	79.9038
4	G09	MCF7-20k GST	21.0442	79.7135	39.5983	70.4216
4	G10	MCF7-20k GST	21.0442	81.4986	37.6906	67.0289
4	G11	MCF7-20k GST	21.0442	76.0539	45.2488	80.4705
4	G12	MCF7-20k GST	21.0442	84.2218	37.7834	67.1939
4	H01	Background	21.0442	0	0	0
4	H02	Unassigned	21.0442	4.29457	1.69297	3.01077
4	H03	Unassigned	21.0442	4.90734	-0.0964747	-0.171571
4	H04	Unassigned	21.0442	1.93989	3.2547	5.78815
4	H05	Unassigned	21.0442	3.95273	0.513334	0.912913
4	H06	Unassigned	21.0442	-4.03817	4.52074	8.03969
4	H07	Unassigned	21.0442	-0.0755121	2.55322	4.54064
4	H08	Unassigned	21.0442	-2.28657	0.59788	1.06327
4	H09	Unassigned	21.0442	-5.23776	-0.989118	-1.75905
4	H10	Unassigned	21.0442	-4.6025	-1.12993	-2.00947
4	H11	Unassigned	21.0442	-3.24674	0.801794	1.42591
4	H12	Background	21.0442	0	0	0
5	A01	Background	27.5628	0	0	0
5	A02	Unassigned	27.5628	2.23569	-3.46395	-6.16028
5	A03	Unassigned	27.5628	-8.88309	2.44316	4.34491
5	A04	Unassigned	27.5628	7.07021	-2.45036	-4.35771
5	A05	Unassigned	27.5628	2.49513	-0.356836	-0.634597
5	A06	Unassigned	27.5628	3.19259	-1.57192	-2.7955
5	A07	Unassigned	27.5628	2.17825	1.00457	1.78652
5	A08	Unassigned	27.5628	-2.84066	-3.96425	-7.05001
5	A09	Unassigned	27.5628	-8.29676	1.0186	1.81147
5	A10	Unassigned	27.5628	-3.42021	0.446632	0.794291
5	A11	Unassigned	27.5628	-3.38512	-2.07704	-3.69381
5	A12	Background	27.5628	0	0	0
5	B01	Outliers	27.5628	17.9984	27.5917	49.069
5	B02	Outliers	27.5628	24.9645	45.3484	80.6476
5	B03	Outliers	27.5628	9.06217	42.0037	74.6993
5	B04	Outliers	27.5628	21.1144	46.9934	83.5731
5	B05	Outliers	27.5628	37.6293	73.7312	131.124
5	B06	Outliers	27.5628	34.5568	67.8859	120.728
5	B07	Outliers	27.5628	41.0857	75.6623	134.558
5	B08	Outliers	27.5628	38.4871	77.4173	137.679
5	B09	Outliers	27.5628	57.8706	93.6443	166.537
5	B10	Outliers	27.5628	54.8826	92.3077	164.16
5	B11	Outliers	27.5628	46.0721	69.1988	123.063
5	B12	Outliers	27.5628	58.324	76.3005	135.693
5	C01	Outliers	27.5628	16.0988	35.1785	62.5615
5	C02	Outliers	27.5628	23.5793	35.7632	63.6013
5	C03	Outliers	27.5628	23.5916	52.5514	93.4574
5	C04	Outliers	27.5628	1.1133	63.0386	112.108
5	C05	Outliers	27.5628	24.983	65.4502	116.397
5	C06	Outliers	27.5628	36.067	77.9981	138.712
5	C07	Outliers	27.5628	38.7186	81.0425	144.126
5	C08	Outliers	27.5628	40.5904	81.0777	144.189
5	C09	Outliers	27.5628	60.0898	89.3251	158.856
5	C10	Outliers	27.5628	45.1013	72.8793	129.608
5	C11	Outliers	27.5628	47.2111	76.0719	135.286
5	C12	Outliers	27.5628	53.577	67.5871	120.197
5	D01	Outliers	27.5628	20.8098	45.1057	80.2159
5	D02	Outliers	27.5628	20.4065	49.719	88.4204
5	D03	Outliers	27.5628	18.5248	43.0352	76.5339
5	D04	Outliers	27.5628	24.2656	39.8716	70.9077
5	D05	Outliers	27.5628	28.2894	63.2087	112.41
5	D06	Outliers	27.5628	40.5085	72.9254	129.691
5	D07	Outliers	27.5628	34.5692	76.2268	135.562
5	D08	Outliers	27.5628	29.5744	72.7179	129.321
5	D09	Outliers	27.5628	49.5674	81.769	145.418
5	D10	Outliers	27.5628	46.9099	65.9355	117.26
5	D11	Outliers	27.5628	33.8638	54.3333	96.6264
5	D12	Outliers	27.5628	47.7134	52.7052	93.7309
5	E01	MCF7-10k GST	27.5628	34.221	24.3747	43.3479
5	E02	MCF7-10k GST	27.5628	42.1727	29.9437	53.2518
5	E03	MCF7-10k GST	27.5628	51.9356	30.7319	54.6536
5	E04	MCF7-10k GST	27.5628	57.0498	38.3403	68.1844
5	E05	MCF7-15k GST	27.5628	44.9461	54.4671	96.8642
5	E06	MCF7-15k GST	27.5628	95.7348	50.2471	89.3595
5	E07	MCF7-15k GST	27.5628	99.3816	57.28	101.867
5	E08	MCF7-15k GST	27.5628	94.7084	48.6867	86.5845
5	E09	MCF7-20k GST	27.5628	101.862	47.1659	83.8798
5	E10	MCF7-20k GST	27.5628	87.2092	37.3423	66.4095
5	E11	MCF7-20k GST	27.5628	102.056	53.2032	94.6166
5	E12	MCF7-20k GST	27.5628	80.5677	47.8139	85.0322
5	F01	MCF7-10k GST	27.5628	46.5534	15.468	27.5082
5	F02	MCF7-10k GST	27.5628	56.7625	39.9831	71.106
5	F03	MCF7-10k GST	27.5628	53.0833	33.1339	58.9253
5	F04	MCF7-10k GST	27.5628	63.306	41.2086	73.2854
5	F05	MCF7-15k GST	27.5628	82.6076	46.4773	82.6552
5	F06	MCF7-15k GST	27.5628	93.2298	52.5143	93.3915
5	F07	MCF7-15k GST	27.5628	102.551	56.9848	101.342
5	F08	MCF7-15k GST	27.5628	99.321	57.6713	102.563
5	F09	MCF7-20k GST	27.5628	76.8872	46.0603	81.9137
5	F10	MCF7-20k GST	27.5628	82.3986	35.6827	63.4581
5	F11	MCF7-20k GST	27.5628	98.0944	48.5093	86.2689
5	F12	MCF7-20k GST	27.5628	83.7267	40.9916	72.8994
5	G01	MCF7-10k GST	27.5628	64.9649	28.4927	50.6715
5	G02	MCF7-10k GST	27.5628	54.2493	24.6425	43.8243
5	G03	MCF7-10k GST	27.5628	48.0195	28.9679	51.5166
5	G04	MCF7-10k GST	27.5628	72.0936	42.5853	75.7336
5	G05	MCF7-15k GST	27.5628	60.8109	45.0665	80.1462
5	G06	MCF7-15k GST	27.5628	112.815	58.8838	104.719
5	G07	MCF7-15k GST	27.5628	76.7752	39.5315	70.3028
5	G08	MCF7-15k GST	27.5628	92.8068	50.1204	89.1342
5	G09	MCF7-20k GST	27.5628	78.7974	46.0675	81.9265
5	G10	MCF7-20k GST	27.5628	81.5653	41.793	74.3247
5	G11	MCF7-20k GST	27.5628	78.2012	48.627	86.4783
5	G12	MCF7-20k GST	27.5628	85.2302	43.935	78.1341
5	H01	Background	27.5628	0	0	0
5	H02	Unassigned	27.5628	4.86569	4.86683	8.65518
5	H03	Unassigned	27.5628	4.82137	0.972297	1.72913
5	H04	Unassigned	27.5628	1.99903	4.47887	7.96522
5	H05	Unassigned	27.5628	3.789	1.89951	3.37808
5	H06	Unassigned	27.5628	-5.64802	7.42968	13.2129
5	H07	Unassigned	27.5628	-0.861739	3.68335	6.55047
5	H08	Unassigned	27.5628	-2.35398	2.28352	4.06101
5	H09	Unassigned	27.5628	-7.61635	1.58633	2.82113
5	H10	Unassigned	27.5628	-4.32809	1.05845	1.88235
5	H11	Unassigned	27.5628	-3.74228	3.13885	5.58214
5	H12	Background	27.5628	0	0	0
6	A01	Background	34.081	0	0	0
6	A02	Unassigned	34.081	3.48516	-7.63265	-13.5739
6	A03	Unassigned	34.081	-8.57806	0.586844	1.04364
6	A04	Unassigned	34.081	7.65995	-5.78836	-10.294
6	A05	Unassigned	34.081	3.46029	-3.87862	-6.89775
6	A06	Unassigned	34.081	3.81476	-4.51521	-8.02986
6	A07	Unassigned	34.081	1.92725	-0.823442	-1.46441
6	A08	Unassigned	34.081	-0.920143	-6.14683	-10.9315
6	A09	Unassigned	34.081	-6.80718	-1.71877	-3.05667
6	A10	Unassigned	34.081	-0.909555	-2.86747	-5.09952
6	A11	Unassigned	34.081	-1.79284	-5.08459	-9.04243
6	A12	Background	34.081	0	0	0
6	B01	Outliers	34.081	19.6498	24.854	44.2004
6	B02	Outliers	34.081	27.7857	42.0881	74.8495
6	B03	Outliers	34.081	10.7929	40.3362	71.7339
6	B04	Outliers	34.081	24.4145	45.4039	80.7463
6	B05	Outliers	34.081	40.0051	74.4249	132.357
6	B06	Outliers	34.081	36.0395	66.0366	117.44
6	B07	Outliers	34.081	43.7459	74.2056	131.967
6	B08	Outliers	34.081	40.9898	79.3189	141.061
6	B09	Outliers	34.081	60.8718	92.9178	165.245
6	B10	Outliers	34.081	56.24	91.2249	162.234
6	B11	Outliers	34.081	49.2757	64.9247	115.462
6	B12	Outliers	34.081	58.336	75.1593	133.663
6	C01	Outliers	34.081	17.4762	29.6037	52.6473
6	C02	Outliers	34.081	24.7421	35.8882	63.8236
6	C03	Outliers	34.081	25.9296	50.3811	89.5978
6	C04	Outliers	34.081	7.91252	62.9232	111.903
6	C05	Outliers	34.081	28.1493	65.0947	115.764
6	C06	Outliers	34.081	38.0251	77.3916	137.633
6	C07	Outliers	34.081	40.9718	79.9711	142.221
6	C08	Outliers	34.081	38.9689	82.4108	146.559
6	C09	Outliers	34.081	63.089	87.7887	156.123
6	C10	Outliers	34.081	46.6539	69.236	123.129
6	C11	Outliers	34.081	48.2046	75.9121	135.002
6	C12	Outliers	34.081	54.4568	64.3601	114.458
6	D01	Outliers	34.081	19.9449	41.4065	73.6373
6	D02	Outliers	34.081	21.447	51.9164	92.3282
6	D03	Outliers	34.081	20.5845	42.2736	75.1793
6	D04	Outliers	34.081	26.9047	39.4165	70.0984
6	D05	Outliers	34.081	31.4253	62.0035	110.267
6	D06	Outliers	34.081	41.8628	72.9597	129.751
6	D07	Outliers	34.081	36.0531	77.5399	137.897
6	D08	Outliers	34.081	31.8944	72.3084	128.593
6	D09	Outliers	34.081	51.821	80.5535	143.256
6	D10	Outliers	34.081	48.3424	65.4992	116.484
6	D11	Outliers	34.081	34.8535	49.7108	88.4057
6	D12	Outliers	34.081	48.2738	46.8002	83.2295
6	E01	MCF7-10k GST	34.081	34.5693	26.2223	46.6338
6	E02	MCF7-10k GST	34.081	41.6366	31.6082	56.212
6	E03	MCF7-10k GST	34.081	51.7423	33.9287	60.3389
6	E04	MCF7-10k GST	34.081	57.5404	41.5534	73.8986
6	E05	MCF7-15k GST	34.081	47.2428	58.3047	103.689
6	E06	MCF7-15k GST	34.081	90.9607	54.0321	96.0906
6	E07	MCF7-15k GST	34.081	100.77	61.1731	108.79
6	E08	MCF7-15k GST	34.081	95.3151	50.7942	90.3324
6	E09	MCF7-20k GST	34.081	101.578	49.9648	88.8573
6	E10	MCF7-20k GST	34.081	86.5178	40.9199	72.7719
6	E11	MCF7-20k GST	34.081	103.215	56.424	100.344
6	E12	MCF7-20k GST	34.081	81.2183	51.7165	91.9726
6	F01	MCF7-10k GST	34.081	47.3544	19.3527	34.4168
6	F02	MCF7-10k GST	34.081	57.1836	42.4872	75.5593
6	F03	MCF7-10k GST	34.081	53.8951	35.3965	62.9492
6	F04	MCF7-10k GST	34.081	63.252	43.4315	77.2385
6	F05	MCF7-15k GST	34.081	81.9787	47.7749	84.9628
6	F06	MCF7-15k GST	34.081	94.4331	55.1852	98.1414
6	F07	MCF7-15k GST	34.081	103.422	60.0968	106.876
6	F08	MCF7-15k GST	34.081	97.6566	61.7529	109.821
6	F09	MCF7-20k GST	34.081	77.0294	49.7778	88.5248
6	F10	MCF7-20k GST	34.081	80.9348	38.3713	68.2395
6	F11	MCF7-20k GST	34.081	100.835	50.8515	90.4344
6	F12	MCF7-20k GST	34.081	82.5447	45.5818	81.0627
6	G01	MCF7-10k GST	34.081	63.4425	32.2459	57.3461
6	G02	MCF7-10k GST	34.081	55.8915	28.0714	49.9221
6	G03	MCF7-10k GST	34.081	50.0597	31.3051	55.6729
6	G04	MCF7-10k GST	34.081	72.2206	44.3344	78.8443
6	G05	MCF7-15k GST	34.081	61.4979	48.4219	86.1135
6	G06	MCF7-15k GST	34.081	105.239	64.5479	114.792
6	G07	MCF7-15k GST	34.081	75.898	43.1516	76.7408
6	G08	MCF7-15k GST	34.081	94.9546	53.9693	95.979
6	G09	MCF7-20k GST	34.081	80.5534	49.6401	88.2799
6	G10	MCF7-20k GST	34.081	82.5391	44.6664	79.4347
6	G11	MCF7-20k GST	34.081	83.343	51.1713	91.0031
6	G12	MCF7-20k GST	34.081	84.2879	46.8213	83.2671
6	H01	Background	34.081	0	0	0
6	H02	Unassigned	34.081	6.33554	5.0496	8.98021
6	H03	Unassigned	34.081	7.09513	1.61001	2.86324
6	H04	Unassigned	34.081	3.63206	4.27836	7.60864
6	H05	Unassigned	34.081	4.1038	2.11561	3.7624
6	H06	Unassigned	34.081	-4.67539	9.2742	16.4932
6	H07	Unassigned	34.081	-0.29454	3.52519	6.26921
6	H08	Unassigned	34.081	-0.642723	3.18184	5.65858
6	H09	Unassigned	34.081	-7.24731	3.12231	5.55272
6	H10	Unassigned	34.081	-2.6399	1.82139	3.23916
6	H11	Unassigned	34.081	-2.99292	4.07076	7.23944
6	H12	Background	34.081	0	0	0
7	A01	Background	40.7389	0	0	0
7	A02	Unassigned	40.7389	4.83324	-4.78478	-8.50925
7	A03	Unassigned	40.7389	-9.19748	2.11476	3.76088
7	A04	Unassigned	40.7389	8.47676	-2.26899	-4.03518
7	A05	Unassigned	40.7389	3.46326	-1.29222	-2.29809
7	A06	Unassigned	40.7389	4.37165	-3.03589	-5.39902
7	A07	Unassigned	40.7389	0.318857	0.640355	1.13881
7	A08	Unassigned	40.7389	-2.33817	-2.38618	-4.24357
7	A09	Unassigned	40.7389	-9.26817	-0.0518412	-0.0921944
7	A10	Unassigned	40.7389	-0.378613	-1.04695	-1.8619
7	A11	Unassigned	40.7389	-1.51182	-2.38585	-4.243
7	A12	Background	40.7389	0	0	0
7	B01	Outliers	40.7389	43.0012	31.9089	56.7468
7	B02	Outliers	40.7389	69.7764	52.0733	92.6072
7	B03	Outliers	40.7389	57.6861	51.1027	90.881
7	B04	Outliers	40.7389	77.5109	55.3401	98.4169
7	B05	Outliers	40.7389	121.215	90.4875	160.923
7	B06	Outliers	40.7389	133.392	79.8146	141.942
7	B07	Outliers	40.7389	154.153	93.5451	166.361
7	B08	Outliers	40.7389	128.447	91.863	163.369
7	B09	Outliers	40.7389	228.654	114.704	203.99
7	B10	Outliers	40.7389	223.435	116.764	207.653
7	B11	Outliers	40.7389	183.339	88.6381	157.634
7	B12	Outliers	40.7389	234.461	104.928	186.604
7	C01	Outliers	40.7389	46.0983	36.5621	65.0221
7	C02	Outliers	40.7389	61.934	40.8408	72.6312
7	C03	Outliers	40.7389	74.3618	61.3548	109.113
7	C04	Outliers	40.7389	68.5105	75.1489	133.645
7	C05	Outliers	40.7389	112.478	77.7844	138.332
7	C06	Outliers	40.7389	125.839	92.0301	163.666
7	C07	Outliers	40.7389	157.848	95.8193	170.405
7	C08	Outliers	40.7389	135.271	100.955	179.538
7	C09	Outliers	40.7389	207.397	109.51	194.753
7	C10	Outliers	40.7389	159.865	90.6021	161.127
7	C11	Outliers	40.7389	166.186	96.0825	170.873
7	C12	Outliers	40.7389	210.591	90.3572	160.691
7	D01	Outliers	40.7389	57.0612	49.9312	88.7977
7	D02	Outliers	40.7389	74.0194	58.099	103.323
7	D03	Outliers	40.7389	58.1295	44.9102	79.8684
7	D04	Outliers	40.7389	71.0318	45.8002	81.4511
7	D05	Outliers	40.7389	110.55	67.6237	120.262
7	D06	Outliers	40.7389	134.858	85.0869	151.318
7	D07	Outliers	40.7389	151.279	93.1473	165.653
7	D08	Outliers	40.7389	132.011	90.2392	160.481
7	D09	Outliers	40.7389	173.873	101.194	179.964
7	D10	Outliers	40.7389	162.911	82.7288	147.125
7	D11	Outliers	40.7389	143.56	66.3354	117.971
7	D12	Outliers	40.7389	156.221	69.3072	123.256
7	E01	MCF7-10k GST	40.7389	19.598	26.7329	47.5418
7	E02	MCF7-10k GST	40.7389	16.1735	43.1049	76.6578
7	E03	MCF7-10k GST	40.7389	30.2697	40.5049	72.034
7	E04	MCF7-10k GST	40.7389	24.8376	63.1916	112.38
7	E05	MCF7-15k GST	40.7389	17.4753	79.3543	141.124
7	E06	MCF7-15k GST	40.7389	46.5994	73.5631	130.825
7	E07	MCF7-15k GST	40.7389	46.9378	88.5856	157.541
7	E08	MCF7-15k GST	40.7389	40.1826	70.6902	125.715
7	E09	MCF7-20k GST	40.7389	50.1924	73.5106	130.731
7	E10	MCF7-20k GST	40.7389	42.482	56.7519	100.928
7	E11	MCF7-20k GST	40.7389	47.1004	87.8753	156.277
7	E12	MCF7-20k GST	40.7389	44.6613	66.6943	118.609
7	F01	MCF7-10k GST	40.7389	32.6665	24.6831	43.8964
7	F02	MCF7-10k GST	40.7389	28.533	63.2578	112.498
7	F03	MCF7-10k GST	40.7389	22.0351	47.4002	84.2966
7	F04	MCF7-10k GST	40.7389	29.0496	66.8099	118.815
7	F05	MCF7-15k GST	40.7389	38.2642	78.389	139.407
7	F06	MCF7-15k GST	40.7389	38.2142	82.2406	146.257
7	F07	MCF7-15k GST	40.7389	50.8126	89.2211	158.671
7	F08	MCF7-15k GST	40.7389	41.179	91.5654	162.84
7	F09	MCF7-20k GST	40.7389	28.9648	71.2168	126.652
7	F10	MCF7-20k GST	40.7389	43.0528	56.5586	100.584
7	F11	MCF7-20k GST	40.7389	51.0417	76.2646	135.629
7	F12	MCF7-20k GST	40.7389	86.7617	50.1058	89.1082
7	G01	MCF7-10k GST	40.7389	48.6125	37.5048	66.6985
7	G02	MCF7-10k GST	40.7389	31.0809	37.6003	66.8684
7	G03	MCF7-10k GST	40.7389	25.133	43.4412	77.2558
7	G04	MCF7-10k GST	40.7389	39.2379	66.6962	118.613
7	G05	MCF7-15k GST	40.7389	21.182	67.1381	119.398
7	G06	MCF7-15k GST	40.7389	47.4236	90.9905	161.818
7	G07	MCF7-15k GST	40.7389	41.6661	53.9627	95.9673
7	G08	MCF7-15k GST	40.7389	35.2713	74.7781	132.985
7	G09	MCF7-20k GST	40.7389	35.9286	72.221	128.438
7	G10	MCF7-20k GST	40.7389	38.8075	67.4581	119.968
7	G11	MCF7-20k GST	40.7389	32.2772	75.6182	134.479
7	G12	MCF7-20k GST	40.7389	44.9663	60.1066	106.894
7	H01	Background	40.7389	0	0	0
7	H02	Unassigned	40.7389	6.65609	-0.180259	-0.320573
7	H03	Unassigned	40.7389	7.98719	-0.533916	-0.949516
7	H04	Unassigned	40.7389	3.1743	1.72359	3.06523
7	H05	Unassigned	40.7389	4.10568	-0.812213	-1.44444
7	H06	Unassigned	40.7389	-3.54683	6.3337	11.2638
7	H07	Unassigned	40.7389	0.098142	2.84535	5.06016
7	H08	Unassigned	40.7389	-1.81275	1.70244	3.02763
7	H09	Unassigned	40.7389	-6.22115	-0.0753259	-0.13396
7	H10	Unassigned	40.7389	-2.31765	-3.49076	-6.20797
7	H11	Unassigned	40.7389	-1.90535	0.129136	0.229655
7	H12	Background	40.7389	0	0	0
8	A01	Background	47.3004	0	0	0
8	A02	Unassigned	47.3004	5.90504	-0.872227	-1.55117
8	A03	Unassigned	47.3004	-9.06092	2.11817	3.76696
8	A04	Unassigned	47.3004	8.07067	-0.243216	-0.432535
8	A05	Unassigned	47.3004	2.29405	2.65483	4.72135
8	A06	Unassigned	47.3004	2.99995	-0.67213	-1.19532
8	A07	Unassigned	47.3004	-0.429973	0.906762	1.61258
8	A08	Unassigned	47.3004	-0.893232	-0.902284	-1.60462
8	A09	Unassigned	47.3004	-6.72347	1.80406	3.20834
8	A10	Unassigned	47.3004	0.482598	0.410742	0.730463
8	A11	Unassigned	47.3004	-1.07956	-0.810919	-1.44214
8	A12	Background	47.3004	0	0	0
8	B01	Outliers	47.3004	41.8673	35.4382	63.0234
8	B02	Outliers	47.3004	71.6506	52.2698	92.9565
8	B03	Outliers	47.3004	59.2417	51.6577	91.868
8	B04	Outliers	47.3004	79.4726	55.632	98.936
8	B05	Outliers	47.3004	128.198	86.361	153.584
8	B06	Outliers	47.3004	136.276	83.2921	148.127
8	B07	Outliers	47.3004	149.61	90.7467	161.384
8	B08	Outliers	47.3004	135.945	87.0434	154.798
8	B09	Outliers	47.3004	227.921	107.824	191.755
8	B10	Outliers	47.3004	232.846	110.072	195.752
8	B11	Outliers	47.3004	185.066	85.7081	152.423
8	B12	Outliers	47.3004	231.938	106.456	189.322
8	C01	Outliers	47.3004	48.0184	38.9642	69.2939
8	C02	Outliers	47.3004	63.6652	41.8601	74.444
8	C03	Outliers	47.3004	77.1263	60.8738	108.258
8	C04	Outliers	47.3004	73.076	75.2987	133.911
8	C05	Outliers	47.3004	115.591	76.1341	135.397
8	C06	Outliers	47.3004	128.329	90.3318	160.646
8	C07	Outliers	47.3004	154.137	93.0703	165.516
8	C08	Outliers	47.3004	142.35	94.4303	167.935
8	C09	Outliers	47.3004	207.975	104.744	186.277
8	C10	Outliers	47.3004	162.649	85.8507	152.677
8	C11	Outliers	47.3004	168.587	88.205	156.864
8	C12	Outliers	47.3004	214.244	90.2396	160.482
8	D01	Outliers	47.3004	56.0445	50.4273	89.6799
8	D02	Outliers	47.3004	73.1468	58.5245	104.08
8	D03	Outliers	47.3004	62.1049	48.3598	86.003
8	D04	Outliers	47.3004	74.3143	45.5842	81.0669
8	D05	Outliers	47.3004	111.001	71.1841	126.594
8	D06	Outliers	47.3004	140.105	84.0116	149.406
8	D07	Outliers	47.3004	150.17	85.4575	151.978
8	D08	Outliers	47.3004	135.051	83.0682	147.728
8	D09	Outliers	47.3004	180.266	96.128	170.954
8	D10	Outliers	47.3004	163.018	77.722	138.221
8	D11	Outliers	47.3004	148.044	67.9503	120.843
8	D12	Outliers	47.3004	160.48	70.3029	125.027
8	E01	MCF7-10k GST	47.3004	32.4774	43.2505	76.9168
8	E02	MCF7-10k GST	47.3004	15.5184	51.2843	91.2041
8	E03	MCF7-10k GST	47.3004	21.9592	50.9832	90.6686
8	E04	MCF7-10k GST	47.3004	26.2248	67.2223	119.548
8	E05	MCF7-15k GST	47.3004	14.2712	87.5837	155.759
8	E06	MCF7-15k GST	47.3004	44.5298	82.4216	146.579
8	E07	MCF7-15k GST	47.3004	45.6245	95.2229	169.344
8	E08	MCF7-15k GST	47.3004	38.9168	77.8804	138.503
8	E09	MCF7-20k GST	47.3004	48.4676	80.9992	144.049
8	E10	MCF7-20k GST	47.3004	41.7193	62.2434	110.694
8	E11	MCF7-20k GST	47.3004	44.7959	90.9726	161.786
8	E12	MCF7-20k GST	47.3004	32.6269	77.4293	137.7
8	F01	MCF7-10k GST	47.3004	32.4793	30.6212	54.4568
8	F02	MCF7-10k GST	47.3004	27.8242	66.0545	117.471
8	F03	MCF7-10k GST	47.3004	23.0184	54.9407	97.7066
8	F04	MCF7-10k GST	47.3004	28.8642	69.6339	123.837
8	F05	MCF7-15k GST	47.3004	37.6721	78.6701	139.907
8	F06	MCF7-15k GST	47.3004	36.7452	88.4541	157.307
8	F07	MCF7-15k GST	47.3004	47.4069	96.4999	171.615
8	F08	MCF7-15k GST	47.3004	41.6211	94.9639	168.884
8	F09	MCF7-20k GST	47.3004	29.2975	78.9834	140.464
8	F10	MCF7-20k GST	47.3004	42.6648	61.4105	109.212
8	F11	MCF7-20k GST	47.3004	50.4601	81.0901	144.211
8	F12	MCF7-20k GST	47.3004	85.6969	51.8446	92.2004
8	G01	MCF7-10k GST	47.3004	48.3005	46.0688	81.9287
8	G02	MCF7-10k GST	47.3004	32.5163	41.7682	74.2805
8	G03	MCF7-10k GST	47.3004	25.0098	49.1564	87.4197
8	G04	MCF7-10k GST	47.3004	39.0705	69.8423	124.208
8	G05	MCF7-15k GST	47.3004	21.147	73.6891	131.049
8	G06	MCF7-15k GST	47.3004	46.5692	97.6839	173.721
8	G07	MCF7-15k GST	47.3004	37.5368	64.3152	114.378
8	G08	MCF7-15k GST	47.3004	33.7407	83.1686	147.907
8	G09	MCF7-20k GST	47.3004	35.2689	77.8339	138.42
8	G10	MCF7-20k GST	47.3004	37.27	72.8738	129.599
8	G11	MCF7-20k GST	47.3004	31.3661	80.4904	143.144
8	G12	MCF7-20k GST	47.3004	38.3011	73.0854	129.975
8	H01	Background	47.3004	0	0	0
8	H02	Unassigned	47.3004	6.38502	1.08283	1.92571
8	H03	Unassigned	47.3004	7.74675	-0.627552	-1.11604
8	H04	Unassigned	47.3004	3.25314	3.47703	6.18355
8	H05	Unassigned	47.3004	4.24118	0.15173	0.269836
8	H06	Unassigned	47.3004	-4.66279	7.90566	14.0594
8	H07	Unassigned	47.3004	-0.296344	3.11623	5.5419
8	H08	Unassigned	47.3004	-1.56272	1.40611	2.50062
8	H09	Unassigned	47.3004	-6.64735	-0.844892	-1.50256
8	H10	Unassigned	47.3004	-1.85328	-5.42252	-9.64342
8	H11	Unassigned	47.3004	-1.58039	-0.0829818	-0.147575
8	H12	Background	47.3004	0	0	0
9	A01	Background	53.8626	0	0	0
9	A02	Unassigned	53.8626	5.49939	-3.52043	-6.26074
9	A03	Unassigned	53.8626	-9.83821	3.34143	5.9424
9	A04	Unassigned	53.8626	7.53031	-1.9939	-3.54595
9	A05	Unassigned	53.8626	-0.217771	3.0943	5.5029
9	A06	Unassigned	53.8626	3.08231	-0.971322	-1.7274
9	A07	Unassigned	53.8626	-1.42426	2.11412	3.75976
9	A08	Unassigned	53.8626	-0.81963	-1.62858	-2.89626
9	A09	Unassigned	53.8626	-5.96838	2.91525	5.18448
9	A10	Unassigned	53.8626	1.11116	-0.617663	-1.09845
9	A11	Unassigned	53.8626	-0.457059	-1.78617	-3.17653
9	A12	Background	53.8626	0	0	0
9	B01	Outliers	53.8626	43.2208	33.1463	58.9473
9	B02	Outliers	53.8626	71.1135	52.3911	93.1724
9	B03	Outliers	53.8626	58.0552	52.9998	94.2548
9	B04	Outliers	53.8626	77.2091	56.8464	101.096
9	B05	Outliers	53.8626	128.365	87.4165	155.461
9	B06	Outliers	53.8626	135.386	83.1163	147.814
9	B07	Outliers	53.8626	148.187	90.9135	161.681
9	B08	Outliers	53.8626	136.616	88.4475	157.295
9	B09	Outliers	53.8626	225.441	108.99	193.827
9	B10	Outliers	53.8626	232.375	109.983	195.594
9	B11	Outliers	53.8626	184.228	84.2166	149.771
9	B12	Outliers	53.8626	232.568	103.008	183.19
9	C01	Outliers	53.8626	47.0678	38.5951	68.6375
9	C02	Outliers	53.8626	63.3834	42.723	75.9786
9	C03	Outliers	53.8626	76.4304	61.5447	109.451
9	C04	Outliers	53.8626	72.6396	77.2345	137.354
9	C05	Outliers	53.8626	115.052	76.716	136.432
9	C06	Outliers	53.8626	127.48	90.3043	160.597
9	C07	Outliers	53.8626	151.721	93.3838	166.074
9	C08	Outliers	53.8626	144.694	94.6264	168.284
9	C09	Outliers	53.8626	206.564	103.839	184.666
9	C10	Outliers	53.8626	159.645	84.7033	150.636
9	C11	Outliers	53.8626	165.906	87.1723	155.027
9	C12	Outliers	53.8626	212.863	83.1224	147.825
9	D01	Outliers	53.8626	54.3865	48.6299	86.4834
9	D02	Outliers	53.8626	71.9223	59.0225	104.966
9	D03	Outliers	53.8626	61.7706	50.3497	89.5418
9	D04	Outliers	53.8626	73.4982	47.2417	84.0147
9	D05	Outliers	53.8626	110.1	72.7997	129.467
9	D06	Outliers	53.8626	142.463	83.2066	147.975
9	D07	Outliers	53.8626	147.811	84.5501	150.364
9	D08	Outliers	53.8626	134.81	82.5614	146.827
9	D09	Outliers	53.8626	179.175	94.7544	168.511
9	D10	Outliers	53.8626	160.211	76.5785	136.187
9	D11	Outliers	53.8626	147.463	67.9396	120.824
9	D12	Outliers	53.8626	160.392	70.5697	125.501
9	E01	MCF7-10k GST	53.8626	31.6559	46.4124	82.5398
9	E02	MCF7-10k GST	53.8626	15.6454	55.1763	98.1255
9	E03	MCF7-10k GST	53.8626	21.1722	54.9857	97.7866
9	E04	MCF7-10k GST	53.8626	27.1802	70.7562	125.833
9	E05	MCF7-15k GST	53.8626	13.8176	92.9358	165.277
9	E06	MCF7-15k GST	53.8626	43.7266	86.1536	153.216
9	E07	MCF7-15k GST	53.8626	47.6108	99.0119	176.083
9	E08	MCF7-15k GST	53.8626	37.9339	82.2189	146.218
9	E09	MCF7-20k GST	53.8626	48.2047	84.446	150.179
9	E10	MCF7-20k GST	53.8626	42.9351	65.4199	116.343
9	E11	MCF7-20k GST	53.8626	44.953	93.3282	165.975
9	E12	MCF7-20k GST	53.8626	33.4553	74.9185	133.235
9	F01	MCF7-10k GST	53.8626	32.9566	32.9516	58.6012
9	F02	MCF7-10k GST	53.8626	29.1932	69.3591	123.348
9	F03	MCF7-10k GST	53.8626	22.5147	58.7914	104.555
9	F04	MCF7-10k GST	53.8626	29.1833	72.5422	129.009
9	F05	MCF7-15k GST	53.8626	38.6639	81.1817	144.374
9	F06	MCF7-15k GST	53.8626	39.3285	92.308	164.161
9	F07	MCF7-15k GST	53.8626	47.643	99.6506	177.219
9	F08	MCF7-15k GST	53.8626	43.602	97.8522	174.02
9	F09	MCF7-20k GST	53.8626	30.1777	83.0671	147.727
9	F10	MCF7-20k GST	53.8626	41.9127	64.3352	114.414
9	F11	MCF7-20k GST	53.8626	51.3556	84.4856	150.249
9	F12	MCF7-20k GST	53.8626	88.5398	54.8177	97.4879
9	G01	MCF7-10k GST	53.8626	47.0215	49.5492	88.1184
9	G02	MCF7-10k GST	53.8626	34.3163	44.9921	80.0139
9	G03	MCF7-10k GST	53.8626	25.5895	53.7191	95.534
9	G04	MCF7-10k GST	53.8626	39.186	73.8914	131.409
9	G05	MCF7-15k GST	53.8626	20.8848	78.4612	139.535
9	G06	MCF7-15k GST	53.8626	47.8988	102.168	181.695
9	G07	MCF7-15k GST	53.8626	36.2121	66.8217	118.836
9	G08	MCF7-15k GST	53.8626	33.3256	84.8859	150.961
9	G09	MCF7-20k GST	53.8626	35.8661	80.5367	143.226
9	G10	MCF7-20k GST	53.8626	38.2721	74.7081	132.861
9	G11	MCF7-20k GST	53.8626	31.9446	83.0857	147.76
9	G12	MCF7-20k GST	53.8626	39.1632	72.4818	128.902
9	H01	Background	53.8626	0	0	0
9	H02	Unassigned	53.8626	5.80881	-0.471742	-0.838947
9	H03	Unassigned	53.8626	5.81342	-0.927641	-1.64972
9	H04	Unassigned	53.8626	3.42609	3.25098	5.78154
9	H05	Unassigned	53.8626	3.65516	2.26928	4.03568
9	H06	Unassigned	53.8626	-4.84601	6.58358	11.7082
9	H07	Unassigned	53.8626	-0.600373	4.70292	8.36368
9	H08	Unassigned	53.8626	-1.81242	0.334805	0.595418
9	H09	Unassigned	53.8626	-6.36927	-0.774774	-1.37786
9	H10	Unassigned	53.8626	-3.28868	-4.16027	-7.39862
9	H11	Unassigned	53.8626	-1.5195	-0.386694	-0.687697
9	H12	Background	53.8626	0	0	0
10	A01	Background	60.488	0	0	0
10	A02	Unassigned	60.488	7.23882	-0.662923	-1.17894
10	A03	Unassigned	60.488	-9.40144	7.9531	14.1438
10	A04	Unassigned	60.488	9.05718	3.74281	6.65621
10	A05	Unassigned	60.488	1.09604	5.58031	9.92402
10	A06	Unassigned	60.488	3.35068	2.93182	5.21394
10	A07	Unassigned	60.488	1.04719	6.3207	11.2407
10	A08	Unassigned	60.488	1.57423	2.58469	4.59662
10	A09	Unassigned	60.488	-5.24628	5.81008	10.3327
10	A10	Unassigned	60.488	1.16769	4.00029	7.11411
10	A11	Unassigned	60.488	0.621239	3.46907	6.16939
10	A12	Background	60.488	0	0	0
10	B01	Outliers	60.488	13.596	32.7982	58.3283
10	B02	Outliers	60.488	20.0776	48.4215	86.1127
10	B03	Outliers	60.488	3.07137	47.8098	85.025
10	B04	Outliers	60.488	21.122	51.2862	91.2074
10	B05	Outliers	60.488	26.4937	78.4648	139.542
10	B06	Outliers	60.488	22.4382	67.1663	119.449
10	B07	Outliers	60.488	28.8205	75.0536	133.475
10	B08	Outliers	60.488	27.2769	81.281	144.55
10	B09	Outliers	60.488	39.6118	93.9551	167.09
10	B10	Outliers	60.488	37.1954	92.2208	164.006
10	B11	Outliers	60.488	34.2121	71.9875	128.023
10	B12	Outliers	60.488	40.1148	76.9826	136.906
10	C01	Outliers	60.488	23.6143	37.1006	65.9796
10	C02	Outliers	60.488	20.3258	36.7771	65.4043
10	C03	Outliers	60.488	17.9451	55.5716	98.8286
10	C04	Outliers	60.488	-4.15573	69.1916	123.05
10	C05	Outliers	60.488	13.2758	69.6155	123.804
10	C06	Outliers	60.488	16.5844	82.1138	146.031
10	C07	Outliers	60.488	24.9369	83.6867	148.828
10	C08	Outliers	60.488	28.3301	89.6627	159.456
10	C09	Outliers	60.488	43.515	89.431	159.044
10	C10	Outliers	60.488	31.4917	73.8087	131.261
10	C11	Outliers	60.488	37.0791	80.7864	143.671
10	C12	Outliers	60.488	38.0621	70.3889	125.18
10	D01	Outliers	60.488	9.7646	45.0629	80.1398
10	D02	Outliers	60.488	11.9964	49.7283	88.4369
10	D03	Outliers	60.488	13.9377	42.5547	75.6793
10	D04	Outliers	60.488	18.5454	42.7816	76.0827
10	D05	Outliers	60.488	18.3786	60.506	107.604
10	D06	Outliers	60.488	25.8811	74.2621	132.068
10	D07	Outliers	60.488	22.4163	80.0815	142.417
10	D08	Outliers	60.488	20.8152	76.4199	135.905
10	D09	Outliers	60.488	33.6655	82.4643	146.654
10	D10	Outliers	60.488	33.6489	68.4764	121.778
10	D11	Outliers	60.488	23.0779	54.1937	96.378
10	D12	Outliers	60.488	35.7042	55.698	99.0533
10	E01	MCF7-10k GST	60.488	31.1887	-3.94931	-7.02346
10	E02	MCF7-10k GST	60.488	16.3378	13.4913	23.993
10	E03	MCF7-10k GST	60.488	21.3155	14.9332	26.5572
10	E04	MCF7-10k GST	60.488	28.7681	22.4947	40.0045
10	E05	MCF7-15k GST	60.488	12.5746	39.0675	69.4776
10	E06	MCF7-15k GST	60.488	49.808	24.1044	42.8672
10	E07	MCF7-15k GST	60.488	52.6565	34.2694	60.9447
10	E08	MCF7-15k GST	60.488	39.9919	26.215	46.6208
10	E09	MCF7-20k GST	60.488	56.1862	34.7088	61.7261
10	E10	MCF7-20k GST	60.488	51.2399	31.9155	56.7586
10	E11	MCF7-20k GST	60.488	52.0456	46.3288	82.3912
10	E12	MCF7-20k GST	60.488	44.6791	38.8938	69.1687
10	F01	MCF7-10k GST	60.488	35.8489	5.62936	10.0112
10	F02	MCF7-10k GST	60.488	30.07	25.5768	45.4857
10	F03	MCF7-10k GST	60.488	22.877	13.2299	23.5281
10	F04	MCF7-10k GST	60.488	31.7255	29.7457	52.8998
10	F05	MCF7-15k GST	60.488	43.8278	41.7548	74.2568
10	F06	MCF7-15k GST	60.488	40.7137	33.5637	59.6896
10	F07	MCF7-15k GST	60.488	52.4205	38.1879	67.9134
10	F08	MCF7-15k GST	60.488	49.1406	39.9582	71.0617
10	F09	MCF7-20k GST	60.488	34.5338	36.7095	65.2842
10	F10	MCF7-20k GST	60.488	46.9689	27.7724	49.3905
10	F11	MCF7-20k GST	60.488	51.9594	29.1931	51.9171
10	F12	MCF7-20k GST	60.488	70.0152	10.8926	19.3714
10	G01	MCF7-10k GST	60.488	48.8393	10.2438	18.2176
10	G02	MCF7-10k GST	60.488	35.7549	7.47907	13.3008
10	G03	MCF7-10k GST	60.488	28.7196	18.4572	32.8242
10	G04	MCF7-10k GST	60.488	41.9722	33.4378	59.4657
10	G05	MCF7-15k GST	60.488	24.1242	30.5201	54.2769
10	G06	MCF7-15k GST	60.488	55.9332	47.9832	85.3334
10	G07	MCF7-15k GST	60.488	42.2212	21.0866	37.5004
10	G08	MCF7-15k GST	60.488	37.0966	31.5904	56.1803
10	G09	MCF7-20k GST	60.488	41.2687	31.8723	56.6818
10	G10	MCF7-20k GST	60.488	43.1825	32.927	58.5574
10	G11	MCF7-20k GST	60.488	34.5206	31.7338	56.4354
10	G12	MCF7-20k GST	60.488	43.6933	27.24	48.4436
10	H01	Background	60.488	0	0	0
10	H02	Unassigned	60.488	5.74677	-4.15067	-7.38156
10	H03	Unassigned	60.488	0.917354	-3.96909	-7.05864
10	H04	Unassigned	60.488	1.8282	-2.50917	-4.4623
10	H05	Unassigned	60.488	3.16636	-7.34453	-13.0615
10	H06	Unassigned	60.488	-7.07821	-4.24844	-7.55543
10	H07	Unassigned	60.488	-4.97336	-9.09559	-16.1756
10	H08	Unassigned	60.488	-3.17706	-6.64874	-11.8241
10	H09	Unassigned	60.488	-7.18179	-8.63818	-15.3621
10	H10	Unassigned	60.488	-6.25213	-13.5129	-24.0313
10	H11	Unassigned	60.488	-2.83821	-9.42829	-16.7673
10	H12	Background	60.488	0	0	0
11	A01	Background	67.0614	0	0	0
11	A02	Unassigned	67.0614	6.79001	-1.03065	-1.8329
11	A03	Unassigned	67.0614	-11.2477	4.52302	8.04374
11	A04	Unassigned	67.0614	8.60128	0.626578	1.11431
11	A05	Unassigned	67.0614	1.10682	4.65202	8.27316
11	A06	Unassigned	67.0614	4.30904	0.23008	0.409174
11	A07	Unassigned	67.0614	-0.511182	3.55442	6.32119
11	A08	Unassigned	67.0614	1.48841	0.86506	1.53842
11	A09	Unassigned	67.0614	-4.7087	3.6362	6.46663
11	A10	Unassigned	67.0614	0.815848	2.04879	3.64357
11	A11	Unassigned	67.0614	0.538549	0.417366	0.742244
11	A12	Background	67.0614	0	0	0
11	B01	Outliers	67.0614	14.8068	32.0807	57.0524
11	B02	Outliers	67.0614	21.0251	45.3496	80.6498
11	B03	Outliers	67.0614	0.985434	45.8349	81.5128
11	B04	Outliers	67.0614	15.7611	49.5563	88.131
11	B05	Outliers	67.0614	26.083	75.3524	134.007
11	B06	Outliers	67.0614	23.1442	70.5335	125.437
11	B07	Outliers	67.0614	28.1799	77.1361	137.179
11	B08	Outliers	67.0614	26.2617	77.5802	137.969
11	B09	Outliers	67.0614	38.7584	93.0165	165.421
11	B10	Outliers	67.0614	35.5317	91.4765	162.682
11	B11	Outliers	67.0614	31.4731	69.8765	124.268
11	B12	Outliers	67.0614	37.9347	76.7215	136.442
11	C01	Outliers	67.0614	19.5469	35.7865	63.6427
11	C02	Outliers	67.0614	19.2329	34.8398	61.9591
11	C03	Outliers	67.0614	16.7787	53.3348	94.8505
11	C04	Outliers	67.0614	-1.88691	67.6901	120.38
11	C05	Outliers	67.0614	13.0826	66.0849	117.525
11	C06	Outliers	67.0614	16.9357	78.5767	139.741
11	C07	Outliers	67.0614	25.2204	81.6306	145.172
11	C08	Outliers	67.0614	29.5869	83.27	148.087
11	C09	Outliers	67.0614	42.4883	88.7349	157.806
11	C10	Outliers	67.0614	28.7903	71.3738	126.931
11	C11	Outliers	67.0614	34.4715	74.9161	133.231
11	C12	Outliers	67.0614	35.9237	68.1818	121.255
11	D01	Outliers	67.0614	11.6701	44.482	79.1068
11	D02	Outliers	67.0614	12.4204	48.7835	86.7567
11	D03	Outliers	67.0614	13.5602	44.4873	79.1161
11	D04	Outliers	67.0614	16.342	40.9439	72.8147
11	D05	Outliers	67.0614	17.8932	63.062	112.149
11	D06	Outliers	67.0614	24.9815	72.4228	128.797
11	D07	Outliers	67.0614	20.2768	74.4913	132.475
11	D08	Outliers	67.0614	20.1363	72.0614	128.154
11	D09	Outliers	67.0614	32.4848	81.323	144.625
11	D10	Outliers	67.0614	31.056	65.295	116.121
11	D11	Outliers	67.0614	20.8974	56.855	101.111
11	D12	Outliers	67.0614	33.6486	53.8244	95.7213
11	E01	MCF7-10k GST	67.0614	49.1998	9.08298	16.1532
11	E02	MCF7-10k GST	67.0614	15.9555	9.07536	16.1396
11	E03	MCF7-10k GST	67.0614	20.7966	12.6141	22.433
11	E04	MCF7-10k GST	67.0614	28.8013	12.6262	22.4544
11	E05	MCF7-15k GST	67.0614	14.7112	23.0337	40.9631
11	E06	MCF7-15k GST	67.0614	48.2233	23.4007	41.6158
11	E07	MCF7-15k GST	67.0614	53.4274	17.4034	30.9502
11	E08	MCF7-15k GST	67.0614	38.1377	16.2396	28.8804
11	E09	MCF7-20k GST	67.0614	52.9243	23.8213	42.3638
11	E10	MCF7-20k GST	67.0614	49.4547	16.4456	29.2468
11	E11	MCF7-20k GST	67.0614	49.609	21.2421	37.7769
11	E12	MCF7-20k GST	67.0614	35.2061	20.8191	37.0246
11	F01	MCF7-10k GST	67.0614	37.1115	0.895598	1.59273
11	F02	MCF7-10k GST	67.0614	29.3061	14.2265	25.3004
11	F03	MCF7-10k GST	67.0614	22.5116	10.8788	19.3469
11	F04	MCF7-10k GST	67.0614	30.9126	15.9395	28.3468
11	F05	MCF7-15k GST	67.0614	41.0673	19.4205	34.5374
11	F06	MCF7-15k GST	67.0614	40.4119	19.4679	34.6217
11	F07	MCF7-15k GST	67.0614	51.1264	19.1965	34.139
11	F08	MCF7-15k GST	67.0614	48.7116	19.2274	34.1939
11	F09	MCF7-20k GST	67.0614	34.5569	23.874	42.4575
11	F10	MCF7-20k GST	67.0614	47.0706	14.2197	25.2883
11	F11	MCF7-20k GST	67.0614	51.7329	15.8169	28.1288
11	F12	MCF7-20k GST	67.0614	71.4542	12.116	21.547
11	G01	MCF7-10k GST	67.0614	50.6357	8.73179	15.5286
11	G02	MCF7-10k GST	67.0614	36.1629	7.39003	13.1424
11	G03	MCF7-10k GST	67.0614	27.7617	10.1182	17.9943
11	G04	MCF7-10k GST	67.0614	40.9128	15.5181	27.5974
11	G05	MCF7-15k GST	67.0614	24.2204	18.424	32.7653
11	G06	MCF7-15k GST	67.0614	54.0639	29.2457	52.0105
11	G07	MCF7-15k GST	67.0614	39.8631	13.0477	23.2041
11	G08	MCF7-15k GST	67.0614	35.109	19.2557	34.2444
11	G09	MCF7-20k GST	67.0614	41.1957	16.8629	29.9889
11	G10	MCF7-20k GST	67.0614	41.8237	15.7544	28.0176
11	G11	MCF7-20k GST	67.0614	34.9975	16.8715	30.0042
11	G12	MCF7-20k GST	67.0614	42.9675	14.6304	26.0186
11	H01	Background	67.0614	0	0	0
11	H02	Unassigned	67.0614	6.86803	-0.686549	-1.22096
11	H03	Unassigned	67.0614	1.2063	-1.73447	-3.08458
11	H04	Unassigned	67.0614	2.83773	-1.05712	-1.87998
11	H05	Unassigned	67.0614	4.56277	-3.13567	-5.57647
11	H06	Unassigned	67.0614	-3.40233	1.64777	2.9304
11	H07	Unassigned	67.0614	-1.63561	-3.26057	-5.79859
11	H08	Unassigned	67.0614	-2.22988	-0.836415	-1.48748
11	H09	Unassigned	67.0614	-5.59406	-3.2685	-5.8127
11	H10	Unassigned	67.0614	-2.50869	-2.46479	-4.38337
11	H11	Unassigned	67.0614	-0.991256	-3.72628	-6.62682
11	H12	Background	67.0614	0	0	0
12	A01	Background	73.6254	0	0	0
12	A02	Unassigned	73.6254	6.89242	-2.85919	-5.08478
12	A03	Unassigned	73.6254	-10.7485	3.84093	6.83072
12	A04	Unassigned	73.6254	8.32165	-0.451217	-0.802445
12	A05	Unassigned	73.6254	1.02826	2.23383	3.97264
12	A06	Unassigned	73.6254	3.81822	-1.21953	-2.16881
12	A07	Unassigned	73.6254	-0.790564	2.57703	4.58298
12	A08	Unassigned	73.6254	1.62214	-0.875236	-1.55652
12	A09	Unassigned	73.6254	-4.65738	1.24199	2.20876
12	A10	Unassigned	73.6254	0.144866	0.443516	0.788749
12	A11	Unassigned	73.6254	1.40454	-0.931136	-1.65593
12	A12	Background	73.6254	0	0	0
12	B01	Outliers	73.6254	12.8681	28.6655	50.9788
12	B02	Outliers	73.6254	20.4303	43.5858	77.5129
12	B03	Outliers	73.6254	0.281885	44.7198	79.5296
12	B04	Outliers	73.6254	17.4105	48.3064	85.908
12	B05	Outliers	73.6254	25.7623	75.3506	134.003
12	B06	Outliers	73.6254	21.59	69.2592	123.171
12	B07	Outliers	73.6254	27.1472	75.1496	133.646
12	B08	Outliers	73.6254	25.9115	78.0733	138.846
12	B09	Outliers	73.6254	37.4762	92.2005	163.969
12	B10	Outliers	73.6254	33.1471	90.5402	161.017
12	B11	Outliers	73.6254	30.9506	66.3853	118.06
12	B12	Outliers	73.6254	37.2073	75.3404	133.985
12	C01	Outliers	73.6254	13.6037	25.3927	45.1584
12	C02	Outliers	73.6254	18.153	32.5691	57.921
12	C03	Outliers	73.6254	16.5994	52.7949	93.8905
12	C04	Outliers	73.6254	-3.69567	68.1499	121.198
12	C05	Outliers	73.6254	12.8927	66.4132	118.109
12	C06	Outliers	73.6254	16.53	78.0586	138.819
12	C07	Outliers	73.6254	24.9085	81.1678	144.349
12	C08	Outliers	73.6254	29.5388	83.024	147.65
12	C09	Outliers	73.6254	42.6196	88.0326	156.557
12	C10	Outliers	73.6254	25.9029	69.9771	124.447
12	C11	Outliers	73.6254	32.2788	74.1083	131.794
12	C12	Outliers	73.6254	34.5159	64.392	114.515
12	D01	Outliers	73.6254	11.8693	42.1659	74.9879
12	D02	Outliers	73.6254	12.1751	48.0859	85.516
12	D03	Outliers	73.6254	13.6286	44.3875	78.9387
12	D04	Outliers	73.6254	15.4359	40.4635	71.9603
12	D05	Outliers	73.6254	17.0976	62.4362	111.037
12	D06	Outliers	73.6254	24.6929	71.3158	126.828
12	D07	Outliers	73.6254	19.2793	75.0415	133.454
12	D08	Outliers	73.6254	20.5823	71.1813	126.589
12	D09	Outliers	73.6254	31.4022	80.6389	143.408
12	D10	Outliers	73.6254	29.7242	64.1784	114.135
12	D11	Outliers	73.6254	19.7682	53.0751	94.3888
12	D12	Outliers	73.6254	30.7708	46.5188	82.7291
12	E01	MCF7-10k GST	73.6254	45.0297	9.40845	16.732
12	E02	MCF7-10k GST	73.6254	16.5527	8.26111	14.6916
12	E03	MCF7-10k GST	73.6254	21.9539	12.3971	22.0471
12	E04	MCF7-10k GST	73.6254	29.5108	11.0125	19.5846
12	E05	MCF7-15k GST	73.6254	16.4185	18.7283	33.3064
12	E06	MCF7-15k GST	73.6254	47.9757	20.7641	36.927
12	E07	MCF7-15k GST	73.6254	53.5379	15.2699	27.156
12	E08	MCF7-15k GST	73.6254	36.0114	14.0976	25.0711
12	E09	MCF7-20k GST	73.6254	52.5406	19.2229	34.186
12	E10	MCF7-20k GST	73.6254	49.0307	14.4118	25.63
12	E11	MCF7-20k GST	73.6254	50.8171	16.8747	30.0099
12	E12	MCF7-20k GST	73.6254	36.6547	16.29	28.9701
12	F01	MCF7-10k GST	73.6254	37.4229	0.478363	0.850721
12	F02	MCF7-10k GST	73.6254	29.8985	12.2789	21.8367
12	F03	MCF7-10k GST	73.6254	23.205	11.2617	20.0277
12	F04	MCF7-10k GST	73.6254	31.6595	12.6311	22.4631
12	F05	MCF7-15k GST	73.6254	41.36	12.8926	22.9281
12	F06	MCF7-15k GST	73.6254	43.1559	16.5642	29.4578
12	F07	MCF7-15k GST	73.6254	51.7654	15.1081	26.8682
12	F08	MCF7-15k GST	73.6254	50.7244	15.6828	27.8902
12	F09	MCF7-20k GST	73.6254	34.3257	20.2487	36.0103
12	F10	MCF7-20k GST	73.6254	45.9568	11.7368	20.8727
12	F11	MCF7-20k GST	73.6254	53.1315	13.3126	23.6751
12	F12	MCF7-20k GST	73.6254	67.4141	11.1515	19.8318
12	G01	MCF7-10k GST	73.6254	49.183	10.0763	17.9197
12	G02	MCF7-10k GST	73.6254	35.4444	6.74591	11.9969
12	G03	MCF7-10k GST	73.6254	27.4467	8.97795	15.9664
12	G04	MCF7-10k GST	73.6254	42.0573	11.3612	20.2047
12	G05	MCF7-15k GST	73.6254	23.9208	15.3854	27.3615
12	G06	MCF7-15k GST	73.6254	55.881	22.7559	40.4691
12	G07	MCF7-15k GST	73.6254	40.2851	10.5182	18.7056
12	G08	MCF7-15k GST	73.6254	35.0237	18.136	32.2531
12	G09	MCF7-20k GST	73.6254	41.0383	14.0817	25.0428
12	G10	MCF7-20k GST	73.6254	41.3487	12.2108	21.7157
12	G11	MCF7-20k GST	73.6254	35.8044	13.8087	24.5574
12	G12	MCF7-20k GST	73.6254	45.3492	12.1755	21.6529
12	H01	Background	73.6254	0	0	0
12	H02	Unassigned	73.6254	6.05262	1.50324	2.67337
12	H03	Unassigned	73.6254	-0.455385	-0.00353878	-0.00629337
12	H04	Unassigned	73.6254	3.4869	0.214209	0.380949
12	H05	Unassigned	73.6254	5.27158	-0.82371	-1.46489
12	H06	Unassigned	73.6254	-3.24843	2.57636	4.5818
12	H07	Unassigned	73.6254	-0.741935	-1.9255	-3.42431
12	H08	Unassigned	73.6254	-1.53882	-0.0011861	-0.00210936
12	H09	Unassigned	73.6254	-5.7008	-1.961	-3.48745
12	H10	Unassigned	73.6254	-1.74019	-0.506162	-0.900158
12	H11	Unassigned	73.6254	-0.142655	-2.178	-3.87336
12	H12	Background	73.6254	0	0	0

## Sheet: L-Normalized Rate
Measurement	Well	Group	Time	OCR	ECAR	PPR					Cycles	Value		Group Name	Selected?		Error Type
1	A01	Background	1.33459	0	0	0					Basal	3		MCF7-10k GST	TRUE		Standard Deviation	TRUE	FALSE
1	A02	Unassigned	1.33459	1.17418	-2.14961	-3.82287					Injection A	3		MCF7-15k GST	TRUE
1	A03	Unassigned	1.33459	-11.0597	1.12105	1.99368					Injection B	3		MCF7-20k GST	TRUE
1	A04	Unassigned	1.33459	0.702111	-3.82161	-6.79635					Injection C	3
1	A05	Unassigned	1.33459	3.80489	-3.71097	-6.59959					Injection D	0
1	A06	Unassigned	1.33459	-6.48159	-1.06634	-1.89637
1	A07	Unassigned	1.33459	-8.95792	4.46445	7.93957
1	A08	Unassigned	1.33459	-0.189421	-1.96588	-3.49612
1	A09	Unassigned	1.33459	-4.80398	0.998797	1.77626
1	A10	Unassigned	1.33459	-0.819074	-0.17733	-0.315364
1	A11	Unassigned	1.33459	-1.45885	-2.63546	-4.68691
1	A12	Background	1.33459	0	0	0
1	B01	Outliers	1.33459	37.2155	20.8014	36.9932
1	B02	Outliers	1.33459	53.9835	32.6745	58.1082
1	B03	Outliers	1.33459	47.2024	29.3277	52.1563
1	B04	Outliers	1.33459	70.5421	36.4213	64.7717
1	B05	Outliers	1.33459	96.9704	49.5344	88.092
1	B06	Outliers	1.33459	93.6853	41.1979	73.2664
1	B07	Outliers	1.33459	104.078	56.7123	100.857
1	B08	Outliers	1.33459	100.646	57.1341	101.607
1	B09	Outliers	1.33459	155.52	65.623	116.704
1	B10	Outliers	1.33459	152.575	65.6064	116.674
1	B11	Outliers	1.33459	124.576	49.7416	88.4604
1	B12	Outliers	1.33459	144.506	57.2296	101.777
1	C01	Outliers	1.33459	38.1282	23.1123	41.103
1	C02	Outliers	1.33459	48.7611	24.9371	44.3481
1	C03	Outliers	1.33459	62.9866	37.6734	66.9984
1	C04	Outliers	1.33459	70.6578	43.6803	77.681
1	C05	Outliers	1.33459	88.6822	45.5744	81.0495
1	C06	Outliers	1.33459	91.5547	53.8753	95.8118
1	C07	Outliers	1.33459	103.798	58.6152	104.241
1	C08	Outliers	1.33459	105.765	60.6524	107.864
1	C09	Outliers	1.33459	140.594	62.5712	111.277
1	C10	Outliers	1.33459	119.269	49.3271	87.7233
1	C11	Outliers	1.33459	119.445	54.2935	96.5555
1	C12	Outliers	1.33459	141.437	48.7574	86.7102
1	D01	Outliers	1.33459	42.5502	27.991	49.7791
1	D02	Outliers	1.33459	52.5614	37.6497	66.9562
1	D03	Outliers	1.33459	48.763	30.9105	54.9712
1	D04	Outliers	1.33459	59.3228	32.2047	57.2728
1	D05	Outliers	1.33459	84.9567	48.7394	86.6782
1	D06	Outliers	1.33459	109.488	51.958	92.4022
1	D07	Outliers	1.33459	102.309	53.8805	95.8211
1	D08	Outliers	1.33459	90.3463	56.383	100.272
1	D09	Outliers	1.33459	128.98	56.1018	99.7715
1	D10	Outliers	1.33459	119.866	46.7588	83.1559
1	D11	Outliers	1.33459	113.279	42.3034	75.2323
1	D12	Outliers	1.33459	113.439	38.2107	67.9539
1	E01	MCF7-10k GST	1.33459	36.0986	7.50494	13.3468
1	E02	MCF7-10k GST	1.33459	47.714	14.9793	26.6391
1	E03	MCF7-10k GST	1.33459	56.2454	14.5623	25.8976
1	E04	MCF7-10k GST	1.33459	65.3626	17.3947	30.9347
1	E05	MCF7-15k GST	1.33459	70.141	25.4049	45.1801
1	E06	MCF7-15k GST	1.33459	92.552	18.5964	33.0719
1	E07	MCF7-15k GST	1.33459	112.167	24.3102	43.2332
1	E08	MCF7-15k GST	1.33459	100.485	37.6394	66.9379
1	E09	MCF7-20k GST	1.33459	108.899	23.5716	41.9197
1	E10	MCF7-20k GST	1.33459	96.6987	8.44567	15.0198
1	E11	MCF7-20k GST	1.33459	115.658	22.592	40.1776
1	E12	MCF7-20k GST	1.33459	96.7515	22.6715	40.319
1	F01	MCF7-10k GST	1.33459	42.7194	-6.27939	-11.1673
1	F02	MCF7-10k GST	1.33459	60.8639	21.1553	37.6226
1	F03	MCF7-10k GST	1.33459	58.2449	16.0443	28.5331
1	F04	MCF7-10k GST	1.33459	73.0289	16.6243	29.5647
1	F05	MCF7-15k GST	1.33459	100.298	24.1968	43.0316
1	F06	MCF7-15k GST	1.33459	106.072	19.703	35.0399
1	F07	MCF7-15k GST	1.33459	114.15	26.0631	46.3506
1	F08	MCF7-15k GST	1.33459	110.246	30.0569	53.4532
1	F09	MCF7-20k GST	1.33459	86.7507	23.2808	41.4026
1	F10	MCF7-20k GST	1.33459	83.6702	14.9671	26.6175
1	F11	MCF7-20k GST	1.33459	113.821	16.8599	29.9836
1	F12	MCF7-20k GST	1.33459	100.107	14.6399	26.0356
1	G01	MCF7-10k GST	1.33459	71.8371	4.41562	7.85273
1	G02	MCF7-10k GST	1.33459	59.4037	6.14275	10.9243
1	G03	MCF7-10k GST	1.33459	52.8125	14.1246	25.1192
1	G04	MCF7-10k GST	1.33459	83.478	16.7864	29.853
1	G05	MCF7-15k GST	1.33459	74.1871	24.4894	43.552
1	G06	MCF7-15k GST	1.33459	108.094	27.5726	49.0351
1	G07	MCF7-15k GST	1.33459	93.9953	12.8529	22.8576
1	G08	MCF7-15k GST	1.33459	99.6686	24.3572	43.3169
1	G09	MCF7-20k GST	1.33459	85.4103	23.8595	42.4317
1	G10	MCF7-20k GST	1.33459	88.8251	17.5838	31.2711
1	G11	MCF7-20k GST	1.33459	88.1359	24.8819	44.2499
1	G12	MCF7-20k GST	1.33459	94.7998	17.0369	30.2983
1	H01	Background	1.33459	0	0	0
1	H02	Unassigned	1.33459	3.80764	-2.32958	-4.14293
1	H03	Unassigned	1.33459	8.36391	0.120408	0.214133
1	H04	Unassigned	1.33459	2.83209	3.3021	5.87245
1	H05	Unassigned	1.33459	-1.05259	2.56639	4.56407
1	H06	Unassigned	1.33459	-3.12704	7.39778	13.1562
1	H07	Unassigned	1.33459	0.695971	3.38251	6.01545
1	H08	Unassigned	1.33459	2.35841	0.26206	0.466048
1	H09	Unassigned	1.33459	-10.7432	2.38875	4.24816
1	H10	Unassigned	1.33459	2.14963	-2.92142	-5.19545
1	H11	Unassigned	1.33459	-7.45345	1.07581	1.91323
1	H12	Background	1.33459	0	0	0
2	A01	Background	7.88222	0	0	0
2	A02	Unassigned	7.88222	0.601182	-5.37171	-9.55305
2	A03	Unassigned	7.88222	-11.9209	2.90308	5.16284
2	A04	Unassigned	7.88222	2.89176	-5.31882	-9.45899
2	A05	Unassigned	7.88222	5.09008	-2.57925	-4.58693
2	A06	Unassigned	7.88222	-3.27	-3.69023	-6.56271
2	A07	Unassigned	7.88222	-0.816925	2.63046	4.67801
2	A08	Unassigned	7.88222	1.90296	-5.3836	-9.57419
2	A09	Unassigned	7.88222	-3.56348	-1.74912	-3.11063
2	A10	Unassigned	7.88222	-0.438798	-1.18294	-2.10374
2	A11	Unassigned	7.88222	-1.96244	-4.7543	-8.45505
2	A12	Background	7.88222	0	0	0
2	B01	Outliers	7.88222	36.0268	17.5162	31.1509
2	B02	Outliers	7.88222	51.8922	27.2063	48.3837
2	B03	Outliers	7.88222	41.2496	24.0904	42.8424
2	B04	Outliers	7.88222	65.1754	29.9718	53.3019
2	B05	Outliers	7.88222	89.8815	46.4679	82.6385
2	B06	Outliers	7.88222	88.7307	36.0152	64.0495
2	B07	Outliers	7.88222	97.8742	47.8522	85.1003
2	B08	Outliers	7.88222	92.8186	55.3777	98.4837
2	B09	Outliers	7.88222	143.866	58.5649	104.152
2	B10	Outliers	7.88222	143.178	59.8273	106.397
2	B11	Outliers	7.88222	117.393	40.7888	72.5388
2	B12	Outliers	7.88222	139.946	50.6573	90.0889
2	C01	Outliers	7.88222	36.3504	20.9377	37.2356
2	C02	Outliers	7.88222	46.4258	21.3128	37.9027
2	C03	Outliers	7.88222	57.2886	35.3827	62.9247
2	C04	Outliers	7.88222	65.3531	40.1793	71.4548
2	C05	Outliers	7.88222	83.2317	42.5982	75.7566
2	C06	Outliers	7.88222	89.3306	50.927	90.5685
2	C07	Outliers	7.88222	99.5593	51.3441	91.3103
2	C08	Outliers	7.88222	97.2864	57.1399	101.618
2	C09	Outliers	7.88222	130.771	55.3628	98.4572
2	C10	Outliers	7.88222	111.772	42.8188	76.149
2	C11	Outliers	7.88222	111.563	53.2863	94.7644
2	C12	Outliers	7.88222	133.116	43.1658	76.766
2	D01	Outliers	7.88222	39.0052	30.2254	53.7528
2	D02	Outliers	7.88222	51.2135	34.4066	61.1887
2	D03	Outliers	7.88222	48.7656	26.7721	47.6116
2	D04	Outliers	7.88222	55.2201	22.6113	40.2119
2	D05	Outliers	7.88222	79.1525	38.0908	67.7407
2	D06	Outliers	7.88222	101.55	41.0205	72.9509
2	D07	Outliers	7.88222	95.694	54.0994	96.2104
2	D08	Outliers	7.88222	91.8385	52.2312	92.888
2	D09	Outliers	7.88222	119.739	48.734	86.6686
2	D10	Outliers	7.88222	112.033	41.8523	74.4301
2	D11	Outliers	7.88222	96.3819	29.175	51.8848
2	D12	Outliers	7.88222	108.875	32.1274	57.1353
2	E01	MCF7-10k GST	7.88222	36.1226	4.09062	7.27476
2	E02	MCF7-10k GST	7.88222	47.5579	6.92249	12.311
2	E03	MCF7-10k GST	7.88222	55.0231	5.3717	9.55302
2	E04	MCF7-10k GST	7.88222	64.089	11.2208	19.9551
2	E05	MCF7-15k GST	7.88222	67.6434	21.4379	38.1251
2	E06	MCF7-15k GST	7.88222	92.4068	14.7305	26.1967
2	E07	MCF7-15k GST	7.88222	109.223	21.4181	38.0899
2	E08	MCF7-15k GST	7.88222	104.007	20.957	37.2699
2	E09	MCF7-20k GST	7.88222	105.781	17.2722	30.7169
2	E10	MCF7-20k GST	7.88222	93.2857	3.59549	6.39422
2	E11	MCF7-20k GST	7.88222	112.551	18.9117	33.6325
2	E12	MCF7-20k GST	7.88222	91.0833	13.8805	24.6851
2	F01	MCF7-10k GST	7.88222	43.3026	-1.75636	-3.12351
2	F02	MCF7-10k GST	7.88222	61.3291	12.7188	22.6191
2	F03	MCF7-10k GST	7.88222	57.4076	8.94768	15.9125
2	F04	MCF7-10k GST	7.88222	69.9522	15.5983	27.74
2	F05	MCF7-15k GST	7.88222	92.5307	23.523	41.8333
2	F06	MCF7-15k GST	7.88222	98.4623	16.5721	29.4718
2	F07	MCF7-15k GST	7.88222	110.062	23.557	41.8939
2	F08	MCF7-15k GST	7.88222	104.618	27.2006	48.3735
2	F09	MCF7-20k GST	7.88222	83.9163	15.8945	28.2667
2	F10	MCF7-20k GST	7.88222	81.6463	8.74015	15.5435
2	F11	MCF7-20k GST	7.88222	112.523	10.4754	18.6294
2	F12	MCF7-20k GST	7.88222	102.439	11.9014	21.1655
2	G01	MCF7-10k GST	7.88222	74.4283	1.59756	2.8411
2	G02	MCF7-10k GST	7.88222	61.6243	2.76652	4.91997
2	G03	MCF7-10k GST	7.88222	48.6754	6.19147	11.0109
2	G04	MCF7-10k GST	7.88222	78.0371	15.3154	27.2368
2	G05	MCF7-15k GST	7.88222	64.9223	15.2118	27.0527
2	G06	MCF7-15k GST	7.88222	101.231	19.029	33.8413
2	G07	MCF7-15k GST	7.88222	88.4713	7.67533	13.6498
2	G08	MCF7-15k GST	7.88222	96.9502	12.678	22.5466
2	G09	MCF7-20k GST	7.88222	82.9383	15.1769	26.9906
2	G10	MCF7-20k GST	7.88222	88.4199	13.1964	23.4686
2	G11	MCF7-20k GST	7.88222	84.042	19.5734	34.8093
2	G12	MCF7-20k GST	7.88222	91.349	9.73023	17.3042
2	H01	Background	7.88222	0	0	0
2	H02	Unassigned	7.88222	5.68524	-4.05741	-7.2157
2	H03	Unassigned	7.88222	7.44049	-2.33933	-4.16027
2	H04	Unassigned	7.88222	2.52448	1.17306	2.08617
2	H05	Unassigned	7.88222	3.36136	-0.403297	-0.717224
2	H06	Unassigned	7.88222	-2.35156	-0.806632	-1.43452
2	H07	Unassigned	7.88222	0.486179	2.1315	3.79066
2	H08	Unassigned	7.88222	2.32335	-0.177177	-0.315091
2	H09	Unassigned	7.88222	-9.76013	-2.68727	-4.77905
2	H10	Unassigned	7.88222	3.14765	-4.70269	-8.36327
2	H11	Unassigned	7.88222	-3.29143	-0.924099	-1.64342
2	H12	Background	7.88222	0	0	0
3	A01	Background	14.3932	0	0	0
3	A02	Unassigned	14.3932	1.2195	-4.19081	-7.45293
3	A03	Unassigned	14.3932	-11.9283	3.38209	6.01472
3	A04	Unassigned	14.3932	3.19228	-2.73089	-4.85662
3	A05	Unassigned	14.3932	4.8362	-1.6283	-2.89576
3	A06	Unassigned	14.3932	-0.58513	-1.48788	-2.64605
3	A07	Unassigned	14.3932	1.66004	1.97453	3.5115
3	A08	Unassigned	14.3932	1.87852	-4.19285	-7.45657
3	A09	Unassigned	14.3932	-2.91354	-0.587793	-1.04533
3	A10	Unassigned	14.3932	-1.83235	-0.925409	-1.64575
3	A11	Unassigned	14.3932	-0.00220261	-2.49017	-4.42852
3	A12	Background	14.3932	0	0	0
3	B01	Outliers	14.3932	34.1249	18.3582	32.6482
3	B02	Outliers	14.3932	49.7478	28.5537	50.7799
3	B03	Outliers	14.3932	40.6056	25.7126	45.7273
3	B04	Outliers	14.3932	62.5512	31.9798	56.8729
3	B05	Outliers	14.3932	87.8633	50.1517	89.1898
3	B06	Outliers	14.3932	87.3881	39.7523	70.6954
3	B07	Outliers	14.3932	95.5043	50.8649	90.4581
3	B08	Outliers	14.3932	89.4216	57.8984	102.967
3	B09	Outliers	14.3932	140.696	61.7734	109.858
3	B10	Outliers	14.3932	139.3	61.8767	110.041
3	B11	Outliers	14.3932	115.906	43.2747	76.9597
3	B12	Outliers	14.3932	138.165	53.8635	95.7909
3	C01	Outliers	14.3932	35.5456	21.3986	38.0553
3	C02	Outliers	14.3932	47.0014	23.1055	41.0909
3	C03	Outliers	14.3932	55.4607	35.2853	62.7513
3	C04	Outliers	14.3932	63.7548	41.311	73.4674
3	C05	Outliers	14.3932	81.1047	43.8855	78.046
3	C06	Outliers	14.3932	86.6108	53.1276	94.4822
3	C07	Outliers	14.3932	97.9119	55.0025	97.8165
3	C08	Outliers	14.3932	96.6855	59.3944	105.627
3	C09	Outliers	14.3932	129.363	57.7427	102.69
3	C10	Outliers	14.3932	108.915	45.4836	80.8879
3	C11	Outliers	14.3932	109.937	55.3443	98.4242
3	C12	Outliers	14.3932	130.151	44.4861	79.1141
3	D01	Outliers	14.3932	39.8376	29.0348	51.6355
3	D02	Outliers	14.3932	50.5435	31.7181	56.4075
3	D03	Outliers	14.3932	48.8215	30.0913	53.5143
3	D04	Outliers	14.3932	53.3865	25.1739	44.7693
3	D05	Outliers	14.3932	76.9389	41.2872	73.4251
3	D06	Outliers	14.3932	97.7833	44.8575	79.7745
3	D07	Outliers	14.3932	93.2019	55.708	99.071
3	D08	Outliers	14.3932	86.1856	54.0229	96.0743
3	D09	Outliers	14.3932	116.737	50.2958	89.446
3	D10	Outliers	14.3932	108.236	43.4927	77.3475
3	D11	Outliers	14.3932	93.6853	30.2237	53.7498
3	D12	Outliers	14.3932	107.197	31.7973	56.5484
3	E01	MCF7-10k GST	14.3932	34.8173	6.28014	11.1686
3	E02	MCF7-10k GST	14.3932	46.9569	6.06317	10.7827
3	E03	MCF7-10k GST	14.3932	54.5693	7.56749	13.458
3	E04	MCF7-10k GST	14.3932	63.7771	12.0835	21.4892
3	E05	MCF7-15k GST	14.3932	64.3343	22.0717	39.2523
3	E06	MCF7-15k GST	14.3932	92.3021	12.72	22.6213
3	E07	MCF7-15k GST	14.3932	107.863	22.2586	39.5847
3	E08	MCF7-15k GST	14.3932	101.24	17.9359	31.8972
3	E09	MCF7-20k GST	14.3932	103.932	16.7871	29.8543
3	E10	MCF7-20k GST	14.3932	91.8163	5.22586	9.29366
3	E11	MCF7-20k GST	14.3932	110.21	18.8669	33.5529
3	E12	MCF7-20k GST	14.3932	87.5256	14.4141	25.634
3	F01	MCF7-10k GST	14.3932	42.2749	2.65762	4.72631
3	F02	MCF7-10k GST	14.3932	60.9198	12.8437	22.8412
3	F03	MCF7-10k GST	14.3932	56.5034	8.13373	14.465
3	F04	MCF7-10k GST	14.3932	68.1719	16.5335	29.4032
3	F05	MCF7-15k GST	14.3932	89.4166	23.4945	41.7826
3	F06	MCF7-15k GST	14.3932	98.1224	16.9329	30.1134
3	F07	MCF7-15k GST	14.3932	109.177	23.9249	42.548
3	F08	MCF7-15k GST	14.3932	104.57	27.2164	48.4017
3	F09	MCF7-20k GST	14.3932	82.9068	16.5223	29.3832
3	F10	MCF7-20k GST	14.3932	79.9402	7.1377	12.6937
3	F11	MCF7-20k GST	14.3932	111.767	10.6158	18.8792
3	F12	MCF7-20k GST	14.3932	92.9563	13.7184	24.3968
3	G01	MCF7-10k GST	14.3932	71.3546	4.17266	7.42065
3	G02	MCF7-10k GST	14.3932	57.7385	1.54631	2.74996
3	G03	MCF7-10k GST	14.3932	49.2152	6.96818	12.3922
3	G04	MCF7-10k GST	14.3932	76.6322	14.957	26.5996
3	G05	MCF7-15k GST	14.3932	61.1736	16.2441	28.8884
3	G06	MCF7-15k GST	14.3932	98.5519	20.876	37.126
3	G07	MCF7-15k GST	14.3932	84.6824	8.66303	15.4063
3	G08	MCF7-15k GST	14.3932	94.4927	15.6802	27.8856
3	G09	MCF7-20k GST	14.3932	82.4594	16.45	29.2548
3	G10	MCF7-20k GST	14.3932	86.8428	13.5195	24.0431
3	G11	MCF7-20k GST	14.3932	83.4165	19.7986	35.2098
3	G12	MCF7-20k GST	14.3932	89.6167	13.5702	24.1332
3	H01	Background	14.3932	0	0	0
3	H02	Unassigned	14.3932	6.19582	-2.09894	-3.73276
3	H03	Unassigned	14.3932	8.0381	-1.57306	-2.79754
3	H04	Unassigned	14.3932	2.50363	1.82466	3.24497
3	H05	Unassigned	14.3932	3.7766	-0.896291	-1.59396
3	H06	Unassigned	14.3932	-2.3759	-0.304031	-0.540689
3	H07	Unassigned	14.3932	0.0249963	2.958	5.26051
3	H08	Unassigned	14.3932	2.29406	-0.373824	-0.664808
3	H09	Unassigned	14.3932	-9.78611	0.532427	0.946868
3	H10	Unassigned	14.3932	-0.132119	-3.93155	-6.99188
3	H11	Unassigned	14.3932	-1.87025	0.711926	1.26609
3	H12	Background	14.3932	0	0	0
4	A01	Background	21.0442	0	0	0
4	A02	Unassigned	21.0442	1.85847	-6.27123	-11.1528
4	A03	Unassigned	21.0442	-8.18377	1.92653	3.42615
4	A04	Unassigned	21.0442	10.7413	-3.87429	-6.89005
4	A05	Unassigned	21.0442	4.16394	-2.5885	-4.60338
4	A06	Unassigned	21.0442	5.76845	-3.63087	-6.45715
4	A07	Unassigned	21.0442	2.9097	0.946995	1.68414
4	A08	Unassigned	21.0442	-3.74757	-4.47542	-7.95909
4	A09	Unassigned	21.0442	-7.37621	-0.0568946	-0.101181
4	A10	Unassigned	21.0442	-2.23509	-0.885946	-1.57557
4	A11	Unassigned	21.0442	-4.33176	-3.83402	-6.81843
4	A12	Background	21.0442	0	0	0
4	B01	Outliers	21.0442	16.982	25.8563	45.9829
4	B02	Outliers	21.0442	23.9304	40.7676	72.5011
4	B03	Outliers	21.0442	11.0018	37.1137	66.0029
4	B04	Outliers	21.0442	19.0836	45.0874	80.1834
4	B05	Outliers	21.0442	38.4983	69.0673	122.829
4	B06	Outliers	21.0442	37.2663	60.4955	107.585
4	B07	Outliers	21.0442	41.6166	68.5694	121.944
4	B08	Outliers	21.0442	39.1083	75.2364	133.8
4	B09	Outliers	21.0442	60.7838	85.9074	152.778
4	B10	Outliers	21.0442	56.9625	87.4454	155.513
4	B11	Outliers	21.0442	49.4558	61.5468	109.455
4	B12	Outliers	21.0442	60.9291	70.6301	125.609
4	C01	Outliers	21.0442	16.4182	29.1316	51.8076
4	C02	Outliers	21.0442	24.411	28.4404	50.5784
4	C03	Outliers	21.0442	25.1186	48.4255	86.1198
4	C04	Outliers	21.0442	-12.7517	55.246	98.2495
4	C05	Outliers	21.0442	23.4356	60.9181	108.337
4	C06	Outliers	21.0442	34.1531	72.3539	128.674
4	C07	Outliers	21.0442	38.4842	75.385	134.065
4	C08	Outliers	21.0442	44.8568	79.1418	140.746
4	C09	Outliers	21.0442	64.1886	82.4786	146.68
4	C10	Outliers	21.0442	47.9735	68.3917	121.628
4	C11	Outliers	21.0442	50.0825	73.4731	130.665
4	C12	Outliers	21.0442	56.5625	64.5093	114.723
4	D01	Outliers	21.0442	20.1832	39.0068	69.3696
4	D02	Outliers	21.0442	18.629	42.0087	74.7083
4	D03	Outliers	21.0442	17.4927	35.3347	62.8393
4	D04	Outliers	21.0442	22.8024	34.1629	60.7553
4	D05	Outliers	21.0442	27.9483	54.6812	97.2451
4	D06	Outliers	21.0442	42.8724	68.2234	121.328
4	D07	Outliers	21.0442	35.37	77.0224	136.977
4	D08	Outliers	21.0442	30.3081	72.0831	128.193
4	D09	Outliers	21.0442	52.0789	76.3994	135.869
4	D10	Outliers	21.0442	48.6219	62.3901	110.955
4	D11	Outliers	21.0442	36.003	47.968	85.3063
4	D12	Outliers	21.0442	50.6072	49.647	88.2922
4	E01	MCF7-10k GST	21.0442	33.2914	17.0098	30.2503
4	E02	MCF7-10k GST	21.0442	42.1714	25.3822	45.1397
4	E03	MCF7-10k GST	21.0442	53.4149	22.4066	39.8479
4	E04	MCF7-10k GST	21.0442	55.1704	34.6819	61.6783
4	E05	MCF7-15k GST	21.0442	39.5642	50.6349	90.0492
4	E06	MCF7-15k GST	21.0442	115.711	44.4838	79.11
4	E07	MCF7-15k GST	21.0442	96.1986	53.3202	94.8246
4	E08	MCF7-15k GST	21.0442	92.7076	45.5493	81.0048
4	E09	MCF7-20k GST	21.0442	104.493	42.7306	75.9922
4	E10	MCF7-20k GST	21.0442	89.9624	28.7324	51.0976
4	E11	MCF7-20k GST	21.0442	100.32	48.3153	85.924
4	E12	MCF7-20k GST	21.0442	86.0697	40.445	71.9274
4	F01	MCF7-10k GST	21.0442	46.4341	10.0346	17.8455
4	F02	MCF7-10k GST	21.0442	56.1649	37.4886	66.6698
4	F03	MCF7-10k GST	21.0442	52.6097	26.5566	47.2282
4	F04	MCF7-10k GST	21.0442	63.139	38.7326	68.882
4	F05	MCF7-15k GST	21.0442	79.9017	47.1794	83.9038
4	F06	MCF7-15k GST	21.0442	96.4076	47.7701	84.9544
4	F07	MCF7-15k GST	21.0442	102.156	54.2927	96.5542
4	F08	MCF7-15k GST	21.0442	102.256	52.1404	92.7265
4	F09	MCF7-20k GST	21.0442	72.2819	40.8329	72.6172
4	F10	MCF7-20k GST	21.0442	81.8676	30.8703	54.8998
4	F11	MCF7-20k GST	21.0442	97.3712	42.4566	75.5049
4	F12	MCF7-20k GST	21.0442	86.1835	35.5682	63.2545
4	G01	MCF7-10k GST	21.0442	71.5242	21.2059	37.7126
4	G02	MCF7-10k GST	21.0442	53.5805	17.0524	30.326
4	G03	MCF7-10k GST	21.0442	48.2429	23.9546	42.6008
4	G04	MCF7-10k GST	21.0442	71.8769	39.4447	70.1484
4	G05	MCF7-15k GST	21.0442	57.508	40.8009	72.5604
4	G06	MCF7-15k GST	21.0442	189.375	54.5751	97.0563
4	G07	MCF7-15k GST	21.0442	78.33	31.7779	56.5138
4	G08	MCF7-15k GST	21.0442	89.9036	44.9301	79.9038
4	G09	MCF7-20k GST	21.0442	79.7135	39.5983	70.4216
4	G10	MCF7-20k GST	21.0442	81.4986	37.6906	67.0289
4	G11	MCF7-20k GST	21.0442	76.0539	45.2488	80.4705
4	G12	MCF7-20k GST	21.0442	84.2218	37.7834	67.1939
4	H01	Background	21.0442	0	0	0
4	H02	Unassigned	21.0442	4.29457	1.69297	3.01077
4	H03	Unassigned	21.0442	4.90734	-0.0964747	-0.171571
4	H04	Unassigned	21.0442	1.93989	3.2547	5.78815
4	H05	Unassigned	21.0442	3.95273	0.513334	0.912913
4	H06	Unassigned	21.0442	-4.03817	4.52074	8.03969
4	H07	Unassigned	21.0442	-0.0755121	2.55322	4.54064
4	H08	Unassigned	21.0442	-2.28657	0.59788	1.06327
4	H09	Unassigned	21.0442	-5.23776	-0.989118	-1.75905
4	H10	Unassigned	21.0442	-4.6025	-1.12993	-2.00947
4	H11	Unassigned	21.0442	-3.24674	0.801794	1.42591
4	H12	Background	21.0442	0	0	0
5	A01	Background	27.5628	0	0	0
5	A02	Unassigned	27.5628	2.23569	-3.46395	-6.16028
5	A03	Unassigned	27.5628	-8.88309	2.44316	4.34491
5	A04	Unassigned	27.5628	7.07021	-2.45036	-4.35771
5	A05	Unassigned	27.5628	2.49513	-0.356836	-0.634597
5	A06	Unassigned	27.5628	3.19259	-1.57192	-2.7955
5	A07	Unassigned	27.5628	2.17825	1.00457	1.78652
5	A08	Unassigned	27.5628	-2.84066	-3.96425	-7.05001
5	A09	Unassigned	27.5628	-8.29676	1.0186	1.81147
5	A10	Unassigned	27.5628	-3.42021	0.446632	0.794291
5	A11	Unassigned	27.5628	-3.38512	-2.07704	-3.69381
5	A12	Background	27.5628	0	0	0
5	B01	Outliers	27.5628	17.9984	27.5917	49.069
5	B02	Outliers	27.5628	24.9645	45.3484	80.6476
5	B03	Outliers	27.5628	9.06217	42.0037	74.6993
5	B04	Outliers	27.5628	21.1144	46.9934	83.5731
5	B05	Outliers	27.5628	37.6293	73.7312	131.124
5	B06	Outliers	27.5628	34.5568	67.8859	120.728
5	B07	Outliers	27.5628	41.0857	75.6623	134.558
5	B08	Outliers	27.5628	38.4871	77.4173	137.679
5	B09	Outliers	27.5628	57.8706	93.6443	166.537
5	B10	Outliers	27.5628	54.8826	92.3077	164.16
5	B11	Outliers	27.5628	46.0721	69.1988	123.063
5	B12	Outliers	27.5628	58.324	76.3005	135.693
5	C01	Outliers	27.5628	16.0988	35.1785	62.5615
5	C02	Outliers	27.5628	23.5793	35.7632	63.6013
5	C03	Outliers	27.5628	23.5916	52.5514	93.4574
5	C04	Outliers	27.5628	1.1133	63.0386	112.108
5	C05	Outliers	27.5628	24.983	65.4502	116.397
5	C06	Outliers	27.5628	36.067	77.9981	138.712
5	C07	Outliers	27.5628	38.7186	81.0425	144.126
5	C08	Outliers	27.5628	40.5904	81.0777	144.189
5	C09	Outliers	27.5628	60.0898	89.3251	158.856
5	C10	Outliers	27.5628	45.1013	72.8793	129.608
5	C11	Outliers	27.5628	47.2111	76.0719	135.286
5	C12	Outliers	27.5628	53.577	67.5871	120.197
5	D01	Outliers	27.5628	20.8098	45.1057	80.2159
5	D02	Outliers	27.5628	20.4065	49.719	88.4204
5	D03	Outliers	27.5628	18.5248	43.0352	76.5339
5	D04	Outliers	27.5628	24.2656	39.8716	70.9077
5	D05	Outliers	27.5628	28.2894	63.2087	112.41
5	D06	Outliers	27.5628	40.5085	72.9254	129.691
5	D07	Outliers	27.5628	34.5692	76.2268	135.562
5	D08	Outliers	27.5628	29.5744	72.7179	129.321
5	D09	Outliers	27.5628	49.5674	81.769	145.418
5	D10	Outliers	27.5628	46.9099	65.9355	117.26
5	D11	Outliers	27.5628	33.8638	54.3333	96.6264
5	D12	Outliers	27.5628	47.7134	52.7052	93.7309
5	E01	MCF7-10k GST	27.5628	34.221	24.3747	43.3479
5	E02	MCF7-10k GST	27.5628	42.1727	29.9437	53.2518
5	E03	MCF7-10k GST	27.5628	51.9356	30.7319	54.6536
5	E04	MCF7-10k GST	27.5628	57.0498	38.3403	68.1844
5	E05	MCF7-15k GST	27.5628	44.9461	54.4671	96.8642
5	E06	MCF7-15k GST	27.5628	95.7348	50.2471	89.3595
5	E07	MCF7-15k GST	27.5628	99.3816	57.28	101.867
5	E08	MCF7-15k GST	27.5628	94.7084	48.6867	86.5845
5	E09	MCF7-20k GST	27.5628	101.862	47.1659	83.8798
5	E10	MCF7-20k GST	27.5628	87.2092	37.3423	66.4095
5	E11	MCF7-20k GST	27.5628	102.056	53.2032	94.6166
5	E12	MCF7-20k GST	27.5628	80.5677	47.8139	85.0322
5	F01	MCF7-10k GST	27.5628	46.5534	15.468	27.5082
5	F02	MCF7-10k GST	27.5628	56.7625	39.9831	71.106
5	F03	MCF7-10k GST	27.5628	53.0833	33.1339	58.9253
5	F04	MCF7-10k GST	27.5628	63.306	41.2086	73.2854
5	F05	MCF7-15k GST	27.5628	82.6076	46.4773	82.6552
5	F06	MCF7-15k GST	27.5628	93.2298	52.5143	93.3915
5	F07	MCF7-15k GST	27.5628	102.551	56.9848	101.342
5	F08	MCF7-15k GST	27.5628	99.321	57.6713	102.563
5	F09	MCF7-20k GST	27.5628	76.8872	46.0603	81.9137
5	F10	MCF7-20k GST	27.5628	82.3986	35.6827	63.4581
5	F11	MCF7-20k GST	27.5628	98.0944	48.5093	86.2689
5	F12	MCF7-20k GST	27.5628	83.7267	40.9916	72.8994
5	G01	MCF7-10k GST	27.5628	64.9649	28.4927	50.6715
5	G02	MCF7-10k GST	27.5628	54.2493	24.6425	43.8243
5	G03	MCF7-10k GST	27.5628	48.0195	28.9679	51.5166
5	G04	MCF7-10k GST	27.5628	72.0936	42.5853	75.7336
5	G05	MCF7-15k GST	27.5628	60.8109	45.0665	80.1462
5	G06	MCF7-15k GST	27.5628	112.815	58.8838	104.719
5	G07	MCF7-15k GST	27.5628	76.7752	39.5315	70.3028
5	G08	MCF7-15k GST	27.5628	92.8068	50.1204	89.1342
5	G09	MCF7-20k GST	27.5628	78.7974	46.0675	81.9265
5	G10	MCF7-20k GST	27.5628	81.5653	41.793	74.3247
5	G11	MCF7-20k GST	27.5628	78.2012	48.627	86.4783
5	G12	MCF7-20k GST	27.5628	85.2302	43.935	78.1341
5	H01	Background	27.5628	0	0	0
5	H02	Unassigned	27.5628	4.86569	4.86683	8.65518
5	H03	Unassigned	27.5628	4.82137	0.972297	1.72913
5	H04	Unassigned	27.5628	1.99903	4.47887	7.96522
5	H05	Unassigned	27.5628	3.789	1.89951	3.37808
5	H06	Unassigned	27.5628	-5.64802	7.42968	13.2129
5	H07	Unassigned	27.5628	-0.861739	3.68335	6.55047
5	H08	Unassigned	27.5628	-2.35398	2.28352	4.06101
5	H09	Unassigned	27.5628	-7.61635	1.58633	2.82113
5	H10	Unassigned	27.5628	-4.32809	1.05845	1.88235
5	H11	Unassigned	27.5628	-3.74228	3.13885	5.58214
5	H12	Background	27.5628	0	0	0
6	A01	Background	34.081	0	0	0
6	A02	Unassigned	34.081	3.48516	-7.63265	-13.5739
6	A03	Unassigned	34.081	-8.57806	0.586844	1.04364
6	A04	Unassigned	34.081	7.65995	-5.78836	-10.294
6	A05	Unassigned	34.081	3.46029	-3.87862	-6.89775
6	A06	Unassigned	34.081	3.81476	-4.51521	-8.02986
6	A07	Unassigned	34.081	1.92725	-0.823442	-1.46441
6	A08	Unassigned	34.081	-0.920143	-6.14683	-10.9315
6	A09	Unassigned	34.081	-6.80718	-1.71877	-3.05667
6	A10	Unassigned	34.081	-0.909555	-2.86747	-5.09952
6	A11	Unassigned	34.081	-1.79284	-5.08459	-9.04243
6	A12	Background	34.081	0	0	0
6	B01	Outliers	34.081	19.6498	24.854	44.2004
6	B02	Outliers	34.081	27.7857	42.0881	74.8495
6	B03	Outliers	34.081	10.7929	40.3362	71.7339
6	B04	Outliers	34.081	24.4145	45.4039	80.7463
6	B05	Outliers	34.081	40.0051	74.4249	132.357
6	B06	Outliers	34.081	36.0395	66.0366	117.44
6	B07	Outliers	34.081	43.7459	74.2056	131.967
6	B08	Outliers	34.081	40.9898	79.3189	141.061
6	B09	Outliers	34.081	60.8718	92.9178	165.245
6	B10	Outliers	34.081	56.24	91.2249	162.234
6	B11	Outliers	34.081	49.2757	64.9247	115.462
6	B12	Outliers	34.081	58.336	75.1593	133.663
6	C01	Outliers	34.081	17.4762	29.6037	52.6473
6	C02	Outliers	34.081	24.7421	35.8882	63.8236
6	C03	Outliers	34.081	25.9296	50.3811	89.5978
6	C04	Outliers	34.081	7.91252	62.9232	111.903
6	C05	Outliers	34.081	28.1493	65.0947	115.764
6	C06	Outliers	34.081	38.0251	77.3916	137.633
6	C07	Outliers	34.081	40.9718	79.9711	142.221
6	C08	Outliers	34.081	38.9689	82.4108	146.559
6	C09	Outliers	34.081	63.089	87.7887	156.123
6	C10	Outliers	34.081	46.6539	69.236	123.129
6	C11	Outliers	34.081	48.2046	75.9121	135.002
6	C12	Outliers	34.081	54.4568	64.3601	114.458
6	D01	Outliers	34.081	19.9449	41.4065	73.6373
6	D02	Outliers	34.081	21.447	51.9164	92.3282
6	D03	Outliers	34.081	20.5845	42.2736	75.1793
6	D04	Outliers	34.081	26.9047	39.4165	70.0984
6	D05	Outliers	34.081	31.4253	62.0035	110.267
6	D06	Outliers	34.081	41.8628	72.9597	129.751
6	D07	Outliers	34.081	36.0531	77.5399	137.897
6	D08	Outliers	34.081	31.8944	72.3084	128.593
6	D09	Outliers	34.081	51.821	80.5535	143.256
6	D10	Outliers	34.081	48.3424	65.4992	116.484
6	D11	Outliers	34.081	34.8535	49.7108	88.4057
6	D12	Outliers	34.081	48.2738	46.8002	83.2295
6	E01	MCF7-10k GST	34.081	34.5693	26.2223	46.6338
6	E02	MCF7-10k GST	34.081	41.6366	31.6082	56.212
6	E03	MCF7-10k GST	34.081	51.7423	33.9287	60.3389
6	E04	MCF7-10k GST	34.081	57.5404	41.5534	73.8986
6	E05	MCF7-15k GST	34.081	47.2428	58.3047	103.689
6	E06	MCF7-15k GST	34.081	90.9607	54.0321	96.0906
6	E07	MCF7-15k GST	34.081	100.77	61.1731	108.79
6	E08	MCF7-15k GST	34.081	95.3151	50.7942	90.3324
6	E09	MCF7-20k GST	34.081	101.578	49.9648	88.8573
6	E10	MCF7-20k GST	34.081	86.5178	40.9199	72.7719
6	E11	MCF7-20k GST	34.081	103.215	56.424	100.344
6	E12	MCF7-20k GST	34.081	81.2183	51.7165	91.9726
6	F01	MCF7-10k GST	34.081	47.3544	19.3527	34.4168
6	F02	MCF7-10k GST	34.081	57.1836	42.4872	75.5593
6	F03	MCF7-10k GST	34.081	53.8951	35.3965	62.9492
6	F04	MCF7-10k GST	34.081	63.252	43.4315	77.2385
6	F05	MCF7-15k GST	34.081	81.9787	47.7749	84.9628
6	F06	MCF7-15k GST	34.081	94.4331	55.1852	98.1414
6	F07	MCF7-15k GST	34.081	103.422	60.0968	106.876
6	F08	MCF7-15k GST	34.081	97.6566	61.7529	109.821
6	F09	MCF7-20k GST	34.081	77.0294	49.7778	88.5248
6	F10	MCF7-20k GST	34.081	80.9348	38.3713	68.2395
6	F11	MCF7-20k GST	34.081	100.835	50.8515	90.4344
6	F12	MCF7-20k GST	34.081	82.5447	45.5818	81.0627
6	G01	MCF7-10k GST	34.081	63.4425	32.2459	57.3461
6	G02	MCF7-10k GST	34.081	55.8915	28.0714	49.9221
6	G03	MCF7-10k GST	34.081	50.0597	31.3051	55.6729
6	G04	MCF7-10k GST	34.081	72.2206	44.3344	78.8443
6	G05	MCF7-15k GST	34.081	61.4979	48.4219	86.1135
6	G06	MCF7-15k GST	34.081	105.239	64.5479	114.792
6	G07	MCF7-15k GST	34.081	75.898	43.1516	76.7408
6	G08	MCF7-15k GST	34.081	94.9546	53.9693	95.979
6	G09	MCF7-20k GST	34.081	80.5534	49.6401	88.2799
6	G10	MCF7-20k GST	34.081	82.5391	44.6664	79.4347
6	G11	MCF7-20k GST	34.081	83.343	51.1713	91.0031
6	G12	MCF7-20k GST	34.081	84.2879	46.8213	83.2671
6	H01	Background	34.081	0	0	0
6	H02	Unassigned	34.081	6.33554	5.0496	8.98021
6	H03	Unassigned	34.081	7.09513	1.61001	2.86324
6	H04	Unassigned	34.081	3.63206	4.27836	7.60864
6	H05	Unassigned	34.081	4.1038	2.11561	3.7624
6	H06	Unassigned	34.081	-4.67539	9.2742	16.4932
6	H07	Unassigned	34.081	-0.29454	3.52519	6.26921
6	H08	Unassigned	34.081	-0.642723	3.18184	5.65858
6	H09	Unassigned	34.081	-7.24731	3.12231	5.55272
6	H10	Unassigned	34.081	-2.6399	1.82139	3.23916
6	H11	Unassigned	34.081	-2.99292	4.07076	7.23944
6	H12	Background	34.081	0	0	0
7	A01	Background	40.7389	0	0	0
7	A02	Unassigned	40.7389	4.83324	-4.78478	-8.50925
7	A03	Unassigned	40.7389	-9.19748	2.11476	3.76088
7	A04	Unassigned	40.7389	8.47676	-2.26899	-4.03518
7	A05	Unassigned	40.7389	3.46326	-1.29222	-2.29809
7	A06	Unassigned	40.7389	4.37165	-3.03589	-5.39902
7	A07	Unassigned	40.7389	0.318857	0.640355	1.13881
7	A08	Unassigned	40.7389	-2.33817	-2.38618	-4.24357
7	A09	Unassigned	40.7389	-9.26817	-0.0518412	-0.0921944
7	A10	Unassigned	40.7389	-0.378613	-1.04695	-1.8619
7	A11	Unassigned	40.7389	-1.51182	-2.38585	-4.243
7	A12	Background	40.7389	0	0	0
7	B01	Outliers	40.7389	43.0012	31.9089	56.7468
7	B02	Outliers	40.7389	69.7764	52.0733	92.6072
7	B03	Outliers	40.7389	57.6861	51.1027	90.881
7	B04	Outliers	40.7389	77.5109	55.3401	98.4169
7	B05	Outliers	40.7389	121.215	90.4875	160.923
7	B06	Outliers	40.7389	133.392	79.8146	141.942
7	B07	Outliers	40.7389	154.153	93.5451	166.361
7	B08	Outliers	40.7389	128.447	91.863	163.369
7	B09	Outliers	40.7389	228.654	114.704	203.99
7	B10	Outliers	40.7389	223.435	116.764	207.653
7	B11	Outliers	40.7389	183.339	88.6381	157.634
7	B12	Outliers	40.7389	234.461	104.928	186.604
7	C01	Outliers	40.7389	46.0983	36.5621	65.0221
7	C02	Outliers	40.7389	61.934	40.8408	72.6312
7	C03	Outliers	40.7389	74.3618	61.3548	109.113
7	C04	Outliers	40.7389	68.5105	75.1489	133.645
7	C05	Outliers	40.7389	112.478	77.7844	138.332
7	C06	Outliers	40.7389	125.839	92.0301	163.666
7	C07	Outliers	40.7389	157.848	95.8193	170.405
7	C08	Outliers	40.7389	135.271	100.955	179.538
7	C09	Outliers	40.7389	207.397	109.51	194.753
7	C10	Outliers	40.7389	159.865	90.6021	161.127
7	C11	Outliers	40.7389	166.186	96.0825	170.873
7	C12	Outliers	40.7389	210.591	90.3572	160.691
7	D01	Outliers	40.7389	57.0612	49.9312	88.7977
7	D02	Outliers	40.7389	74.0194	58.099	103.323
7	D03	Outliers	40.7389	58.1295	44.9102	79.8684
7	D04	Outliers	40.7389	71.0318	45.8002	81.4511
7	D05	Outliers	40.7389	110.55	67.6237	120.262
7	D06	Outliers	40.7389	134.858	85.0869	151.318
7	D07	Outliers	40.7389	151.279	93.1473	165.653
7	D08	Outliers	40.7389	132.011	90.2392	160.481
7	D09	Outliers	40.7389	173.873	101.194	179.964
7	D10	Outliers	40.7389	162.911	82.7288	147.125
7	D11	Outliers	40.7389	143.56	66.3354	117.971
7	D12	Outliers	40.7389	156.221	69.3072	123.256
7	E01	MCF7-10k GST	40.7389	19.598	26.7329	47.5418
7	E02	MCF7-10k GST	40.7389	16.1735	43.1049	76.6578
7	E03	MCF7-10k GST	40.7389	30.2697	40.5049	72.034
7	E04	MCF7-10k GST	40.7389	24.8376	63.1916	112.38
7	E05	MCF7-15k GST	40.7389	17.4753	79.3543	141.124
7	E06	MCF7-15k GST	40.7389	46.5994	73.5631	130.825
7	E07	MCF7-15k GST	40.7389	46.9378	88.5856	157.541
7	E08	MCF7-15k GST	40.7389	40.1826	70.6902	125.715
7	E09	MCF7-20k GST	40.7389	50.1924	73.5106	130.731
7	E10	MCF7-20k GST	40.7389	42.482	56.7519	100.928
7	E11	MCF7-20k GST	40.7389	47.1004	87.8753	156.277
7	E12	MCF7-20k GST	40.7389	44.6613	66.6943	118.609
7	F01	MCF7-10k GST	40.7389	32.6665	24.6831	43.8964
7	F02	MCF7-10k GST	40.7389	28.533	63.2578	112.498
7	F03	MCF7-10k GST	40.7389	22.0351	47.4002	84.2966
7	F04	MCF7-10k GST	40.7389	29.0496	66.8099	118.815
7	F05	MCF7-15k GST	40.7389	38.2642	78.389	139.407
7	F06	MCF7-15k GST	40.7389	38.2142	82.2406	146.257
7	F07	MCF7-15k GST	40.7389	50.8126	89.2211	158.671
7	F08	MCF7-15k GST	40.7389	41.179	91.5654	162.84
7	F09	MCF7-20k GST	40.7389	28.9648	71.2168	126.652
7	F10	MCF7-20k GST	40.7389	43.0528	56.5586	100.584
7	F11	MCF7-20k GST	40.7389	51.0417	76.2646	135.629
7	F12	MCF7-20k GST	40.7389	86.7617	50.1058	89.1082
7	G01	MCF7-10k GST	40.7389	48.6125	37.5048	66.6985
7	G02	MCF7-10k GST	40.7389	31.0809	37.6003	66.8684
7	G03	MCF7-10k GST	40.7389	25.133	43.4412	77.2558
7	G04	MCF7-10k GST	40.7389	39.2379	66.6962	118.613
7	G05	MCF7-15k GST	40.7389	21.182	67.1381	119.398
7	G06	MCF7-15k GST	40.7389	47.4236	90.9905	161.818
7	G07	MCF7-15k GST	40.7389	41.6661	53.9627	95.9673
7	G08	MCF7-15k GST	40.7389	35.2713	74.7781	132.985
7	G09	MCF7-20k GST	40.7389	35.9286	72.221	128.438
7	G10	MCF7-20k GST	40.7389	38.8075	67.4581	119.968
7	G11	MCF7-20k GST	40.7389	32.2772	75.6182	134.479
7	G12	MCF7-20k GST	40.7389	44.9663	60.1066	106.894
7	H01	Background	40.7389	0	0	0
7	H02	Unassigned	40.7389	6.65609	-0.180259	-0.320573
7	H03	Unassigned	40.7389	7.98719	-0.533916	-0.949516
7	H04	Unassigned	40.7389	3.1743	1.72359	3.06523
7	H05	Unassigned	40.7389	4.10568	-0.812213	-1.44444
7	H06	Unassigned	40.7389	-3.54683	6.3337	11.2638
7	H07	Unassigned	40.7389	0.098142	2.84535	5.06016
7	H08	Unassigned	40.7389	-1.81275	1.70244	3.02763
7	H09	Unassigned	40.7389	-6.22115	-0.0753259	-0.13396
7	H10	Unassigned	40.7389	-2.31765	-3.49076	-6.20797
7	H11	Unassigned	40.7389	-1.90535	0.129136	0.229655
7	H12	Background	40.7389	0	0	0
8	A01	Background	47.3004	0	0	0
8	A02	Unassigned	47.3004	5.90504	-0.872227	-1.55117
8	A03	Unassigned	47.3004	-9.06092	2.11817	3.76696
8	A04	Unassigned	47.3004	8.07067	-0.243216	-0.432535
8	A05	Unassigned	47.3004	2.29405	2.65483	4.72135
8	A06	Unassigned	47.3004	2.99995	-0.67213	-1.19532
8	A07	Unassigned	47.3004	-0.429973	0.906762	1.61258
8	A08	Unassigned	47.3004	-0.893232	-0.902284	-1.60462
8	A09	Unassigned	47.3004	-6.72347	1.80406	3.20834
8	A10	Unassigned	47.3004	0.482598	0.410742	0.730463
8	A11	Unassigned	47.3004	-1.07956	-0.810919	-1.44214
8	A12	Background	47.3004	0	0	0
8	B01	Outliers	47.3004	41.8673	35.4382	63.0234
8	B02	Outliers	47.3004	71.6506	52.2698	92.9565
8	B03	Outliers	47.3004	59.2417	51.6577	91.868
8	B04	Outliers	47.3004	79.4726	55.632	98.936
8	B05	Outliers	47.3004	128.198	86.361	153.584
8	B06	Outliers	47.3004	136.276	83.2921	148.127
8	B07	Outliers	47.3004	149.61	90.7467	161.384
8	B08	Outliers	47.3004	135.945	87.0434	154.798
8	B09	Outliers	47.3004	227.921	107.824	191.755
8	B10	Outliers	47.3004	232.846	110.072	195.752
8	B11	Outliers	47.3004	185.066	85.7081	152.423
8	B12	Outliers	47.3004	231.938	106.456	189.322
8	C01	Outliers	47.3004	48.0184	38.9642	69.2939
8	C02	Outliers	47.3004	63.6652	41.8601	74.444
8	C03	Outliers	47.3004	77.1263	60.8738	108.258
8	C04	Outliers	47.3004	73.076	75.2987	133.911
8	C05	Outliers	47.3004	115.591	76.1341	135.397
8	C06	Outliers	47.3004	128.329	90.3318	160.646
8	C07	Outliers	47.3004	154.137	93.0703	165.516
8	C08	Outliers	47.3004	142.35	94.4303	167.935
8	C09	Outliers	47.3004	207.975	104.744	186.277
8	C10	Outliers	47.3004	162.649	85.8507	152.677
8	C11	Outliers	47.3004	168.587	88.205	156.864
8	C12	Outliers	47.3004	214.244	90.2396	160.482
8	D01	Outliers	47.3004	56.0445	50.4273	89.6799
8	D02	Outliers	47.3004	73.1468	58.5245	104.08
8	D03	Outliers	47.3004	62.1049	48.3598	86.003
8	D04	Outliers	47.3004	74.3143	45.5842	81.0669
8	D05	Outliers	47.3004	111.001	71.1841	126.594
8	D06	Outliers	47.3004	140.105	84.0116	149.406
8	D07	Outliers	47.3004	150.17	85.4575	151.978
8	D08	Outliers	47.3004	135.051	83.0682	147.728
8	D09	Outliers	47.3004	180.266	96.128	170.954
8	D10	Outliers	47.3004	163.018	77.722	138.221
8	D11	Outliers	47.3004	148.044	67.9503	120.843
8	D12	Outliers	47.3004	160.48	70.3029	125.027
8	E01	MCF7-10k GST	47.3004	32.4774	43.2505	76.9168
8	E02	MCF7-10k GST	47.3004	15.5184	51.2843	91.2041
8	E03	MCF7-10k GST	47.3004	21.9592	50.9832	90.6686
8	E04	MCF7-10k GST	47.3004	26.2248	67.2223	119.548
8	E05	MCF7-15k GST	47.3004	14.2712	87.5837	155.759
8	E06	MCF7-15k GST	47.3004	44.5298	82.4216	146.579
8	E07	MCF7-15k GST	47.3004	45.6245	95.2229	169.344
8	E08	MCF7-15k GST	47.3004	38.9168	77.8804	138.503
8	E09	MCF7-20k GST	47.3004	48.4676	80.9992	144.049
8	E10	MCF7-20k GST	47.3004	41.7193	62.2434	110.694
8	E11	MCF7-20k GST	47.3004	44.7959	90.9726	161.786
8	E12	MCF7-20k GST	47.3004	32.6269	77.4293	137.7
8	F01	MCF7-10k GST	47.3004	32.4793	30.6212	54.4568
8	F02	MCF7-10k GST	47.3004	27.8242	66.0545	117.471
8	F03	MCF7-10k GST	47.3004	23.0184	54.9407	97.7066
8	F04	MCF7-10k GST	47.3004	28.8642	69.6339	123.837
8	F05	MCF7-15k GST	47.3004	37.6721	78.6701	139.907
8	F06	MCF7-15k GST	47.3004	36.7452	88.4541	157.307
8	F07	MCF7-15k GST	47.3004	47.4069	96.4999	171.615
8	F08	MCF7-15k GST	47.3004	41.6211	94.9639	168.884
8	F09	MCF7-20k GST	47.3004	29.2975	78.9834	140.464
8	F10	MCF7-20k GST	47.3004	42.6648	61.4105	109.212
8	F11	MCF7-20k GST	47.3004	50.4601	81.0901	144.211
8	F12	MCF7-20k GST	47.3004	85.6969	51.8446	92.2004
8	G01	MCF7-10k GST	47.3004	48.3005	46.0688	81.9287
8	G02	MCF7-10k GST	47.3004	32.5163	41.7682	74.2805
8	G03	MCF7-10k GST	47.3004	25.0098	49.1564	87.4197
8	G04	MCF7-10k GST	47.3004	39.0705	69.8423	124.208
8	G05	MCF7-15k GST	47.3004	21.147	73.6891	131.049
8	G06	MCF7-15k GST	47.3004	46.5692	97.6839	173.721
8	G07	MCF7-15k GST	47.3004	37.5368	64.3152	114.378
8	G08	MCF7-15k GST	47.3004	33.7407	83.1686	147.907
8	G09	MCF7-20k GST	47.3004	35.2689	77.8339	138.42
8	G10	MCF7-20k GST	47.3004	37.27	72.8738	129.599
8	G11	MCF7-20k GST	47.3004	31.3661	80.4904	143.144
8	G12	MCF7-20k GST	47.3004	38.3011	73.0854	129.975
8	H01	Background	47.3004	0	0	0
8	H02	Unassigned	47.3004	6.38502	1.08283	1.92571
8	H03	Unassigned	47.3004	7.74675	-0.627552	-1.11604
8	H04	Unassigned	47.3004	3.25314	3.47703	6.18355
8	H05	Unassigned	47.3004	4.24118	0.15173	0.269836
8	H06	Unassigned	47.3004	-4.66279	7.90566	14.0594
8	H07	Unassigned	47.3004	-0.296344	3.11623	5.5419
8	H08	Unassigned	47.3004	-1.56272	1.40611	2.50062
8	H09	Unassigned	47.3004	-6.64735	-0.844892	-1.50256
8	H10	Unassigned	47.3004	-1.85328	-5.42252	-9.64342
8	H11	Unassigned	47.3004	-1.58039	-0.0829818	-0.147575
8	H12	Background	47.3004	0	0	0
9	A01	Background	53.8626	0	0	0
9	A02	Unassigned	53.8626	5.49939	-3.52043	-6.26074
9	A03	Unassigned	53.8626	-9.83821	3.34143	5.9424
9	A04	Unassigned	53.8626	7.53031	-1.9939	-3.54595
9	A05	Unassigned	53.8626	-0.217771	3.0943	5.5029
9	A06	Unassigned	53.8626	3.08231	-0.971322	-1.7274
9	A07	Unassigned	53.8626	-1.42426	2.11412	3.75976
9	A08	Unassigned	53.8626	-0.81963	-1.62858	-2.89626
9	A09	Unassigned	53.8626	-5.96838	2.91525	5.18448
9	A10	Unassigned	53.8626	1.11116	-0.617663	-1.09845
9	A11	Unassigned	53.8626	-0.457059	-1.78617	-3.17653
9	A12	Background	53.8626	0	0	0
9	B01	Outliers	53.8626	43.2208	33.1463	58.9473
9	B02	Outliers	53.8626	71.1135	52.3911	93.1724
9	B03	Outliers	53.8626	58.0552	52.9998	94.2548
9	B04	Outliers	53.8626	77.2091	56.8464	101.096
9	B05	Outliers	53.8626	128.365	87.4165	155.461
9	B06	Outliers	53.8626	135.386	83.1163	147.814
9	B07	Outliers	53.8626	148.187	90.9135	161.681
9	B08	Outliers	53.8626	136.616	88.4475	157.295
9	B09	Outliers	53.8626	225.441	108.99	193.827
9	B10	Outliers	53.8626	232.375	109.983	195.594
9	B11	Outliers	53.8626	184.228	84.2166	149.771
9	B12	Outliers	53.8626	232.568	103.008	183.19
9	C01	Outliers	53.8626	47.0678	38.5951	68.6375
9	C02	Outliers	53.8626	63.3834	42.723	75.9786
9	C03	Outliers	53.8626	76.4304	61.5447	109.451
9	C04	Outliers	53.8626	72.6396	77.2345	137.354
9	C05	Outliers	53.8626	115.052	76.716	136.432
9	C06	Outliers	53.8626	127.48	90.3043	160.597
9	C07	Outliers	53.8626	151.721	93.3838	166.074
9	C08	Outliers	53.8626	144.694	94.6264	168.284
9	C09	Outliers	53.8626	206.564	103.839	184.666
9	C10	Outliers	53.8626	159.645	84.7033	150.636
9	C11	Outliers	53.8626	165.906	87.1723	155.027
9	C12	Outliers	53.8626	212.863	83.1224	147.825
9	D01	Outliers	53.8626	54.3865	48.6299	86.4834
9	D02	Outliers	53.8626	71.9223	59.0225	104.966
9	D03	Outliers	53.8626	61.7706	50.3497	89.5418
9	D04	Outliers	53.8626	73.4982	47.2417	84.0147
9	D05	Outliers	53.8626	110.1	72.7997	129.467
9	D06	Outliers	53.8626	142.463	83.2066	147.975
9	D07	Outliers	53.8626	147.811	84.5501	150.364
9	D08	Outliers	53.8626	134.81	82.5614	146.827
9	D09	Outliers	53.8626	179.175	94.7544	168.511
9	D10	Outliers	53.8626	160.211	76.5785	136.187
9	D11	Outliers	53.8626	147.463	67.9396	120.824
9	D12	Outliers	53.8626	160.392	70.5697	125.501
9	E01	MCF7-10k GST	53.8626	31.6559	46.4124	82.5398
9	E02	MCF7-10k GST	53.8626	15.6454	55.1763	98.1255
9	E03	MCF7-10k GST	53.8626	21.1722	54.9857	97.7866
9	E04	MCF7-10k GST	53.8626	27.1802	70.7562	125.833
9	E05	MCF7-15k GST	53.8626	13.8176	92.9358	165.277
9	E06	MCF7-15k GST	53.8626	43.7266	86.1536	153.216
9	E07	MCF7-15k GST	53.8626	47.6108	99.0119	176.083
9	E08	MCF7-15k GST	53.8626	37.9339	82.2189	146.218
9	E09	MCF7-20k GST	53.8626	48.2047	84.446	150.179
9	E10	MCF7-20k GST	53.8626	42.9351	65.4199	116.343
9	E11	MCF7-20k GST	53.8626	44.953	93.3282	165.975
9	E12	MCF7-20k GST	53.8626	33.4553	74.9185	133.235
9	F01	MCF7-10k GST	53.8626	32.9566	32.9516	58.6012
9	F02	MCF7-10k GST	53.8626	29.1932	69.3591	123.348
9	F03	MCF7-10k GST	53.8626	22.5147	58.7914	104.555
9	F04	MCF7-10k GST	53.8626	29.1833	72.5422	129.009
9	F05	MCF7-15k GST	53.8626	38.6639	81.1817	144.374
9	F06	MCF7-15k GST	53.8626	39.3285	92.308	164.161
9	F07	MCF7-15k GST	53.8626	47.643	99.6506	177.219
9	F08	MCF7-15k GST	53.8626	43.602	97.8522	174.02
9	F09	MCF7-20k GST	53.8626	30.1777	83.0671	147.727
9	F10	MCF7-20k GST	53.8626	41.9127	64.3352	114.414
9	F11	MCF7-20k GST	53.8626	51.3556	84.4856	150.249
9	F12	MCF7-20k GST	53.8626	88.5398	54.8177	97.4879
9	G01	MCF7-10k GST	53.8626	47.0215	49.5492	88.1184
9	G02	MCF7-10k GST	53.8626	34.3163	44.9921	80.0139
9	G03	MCF7-10k GST	53.8626	25.5895	53.7191	95.534
9	G04	MCF7-10k GST	53.8626	39.186	73.8914	131.409
9	G05	MCF7-15k GST	53.8626	20.8848	78.4612	139.535
9	G06	MCF7-15k GST	53.8626	47.8988	102.168	181.695
9	G07	MCF7-15k GST	53.8626	36.2121	66.8217	118.836
9	G08	MCF7-15k GST	53.8626	33.3256	84.8859	150.961
9	G09	MCF7-20k GST	53.8626	35.8661	80.5367	143.226
9	G10	MCF7-20k GST	53.8626	38.2721	74.7081	132.861
9	G11	MCF7-20k GST	53.8626	31.9446	83.0857	147.76
9	G12	MCF7-20k GST	53.8626	39.1632	72.4818	128.902
9	H01	Background	53.8626	0	0	0
9	H02	Unassigned	53.8626	5.80881	-0.471742	-0.838947
9	H03	Unassigned	53.8626	5.81342	-0.927641	-1.64972
9	H04	Unassigned	53.8626	3.42609	3.25098	5.78154
9	H05	Unassigned	53.8626	3.65516	2.26928	4.03568
9	H06	Unassigned	53.8626	-4.84601	6.58358	11.7082
9	H07	Unassigned	53.8626	-0.600373	4.70292	8.36368
9	H08	Unassigned	53.8626	-1.81242	0.334805	0.595418
9	H09	Unassigned	53.8626	-6.36927	-0.774774	-1.37786
9	H10	Unassigned	53.8626	-3.28868	-4.16027	-7.39862
9	H11	Unassigned	53.8626	-1.5195	-0.386694	-0.687697
9	H12	Background	53.8626	0	0	0
10	A01	Background	60.488	0	0	0
10	A02	Unassigned	60.488	7.23882	-0.662923	-1.17894
10	A03	Unassigned	60.488	-9.40144	7.9531	14.1438
10	A04	Unassigned	60.488	9.05718	3.74281	6.65621
10	A05	Unassigned	60.488	1.09604	5.58031	9.92402
10	A06	Unassigned	60.488	3.35068	2.93182	5.21394
10	A07	Unassigned	60.488	1.04719	6.3207	11.2407
10	A08	Unassigned	60.488	1.57423	2.58469	4.59662
10	A09	Unassigned	60.488	-5.24628	5.81008	10.3327
10	A10	Unassigned	60.488	1.16769	4.00029	7.11411
10	A11	Unassigned	60.488	0.621239	3.46907	6.16939
10	A12	Background	60.488	0	0	0
10	B01	Outliers	60.488	13.596	32.7982	58.3283
10	B02	Outliers	60.488	20.0776	48.4215	86.1127
10	B03	Outliers	60.488	3.07137	47.8098	85.025
10	B04	Outliers	60.488	21.122	51.2862	91.2074
10	B05	Outliers	60.488	26.4937	78.4648	139.542
10	B06	Outliers	60.488	22.4382	67.1663	119.449
10	B07	Outliers	60.488	28.8205	75.0536	133.475
10	B08	Outliers	60.488	27.2769	81.281	144.55
10	B09	Outliers	60.488	39.6118	93.9551	167.09
10	B10	Outliers	60.488	37.1954	92.2208	164.006
10	B11	Outliers	60.488	34.2121	71.9875	128.023
10	B12	Outliers	60.488	40.1148	76.9826	136.906
10	C01	Outliers	60.488	23.6143	37.1006	65.9796
10	C02	Outliers	60.488	20.3258	36.7771	65.4043
10	C03	Outliers	60.488	17.9451	55.5716	98.8286
10	C04	Outliers	60.488	-4.15573	69.1916	123.05
10	C05	Outliers	60.488	13.2758	69.6155	123.804
10	C06	Outliers	60.488	16.5844	82.1138	146.031
10	C07	Outliers	60.488	24.9369	83.6867	148.828
10	C08	Outliers	60.488	28.3301	89.6627	159.456
10	C09	Outliers	60.488	43.515	89.431	159.044
10	C10	Outliers	60.488	31.4917	73.8087	131.261
10	C11	Outliers	60.488	37.0791	80.7864	143.671
10	C12	Outliers	60.488	38.0621	70.3889	125.18
10	D01	Outliers	60.488	9.7646	45.0629	80.1398
10	D02	Outliers	60.488	11.9964	49.7283	88.4369
10	D03	Outliers	60.488	13.9377	42.5547	75.6793
10	D04	Outliers	60.488	18.5454	42.7816	76.0827
10	D05	Outliers	60.488	18.3786	60.506	107.604
10	D06	Outliers	60.488	25.8811	74.2621	132.068
10	D07	Outliers	60.488	22.4163	80.0815	142.417
10	D08	Outliers	60.488	20.8152	76.4199	135.905
10	D09	Outliers	60.488	33.6655	82.4643	146.654
10	D10	Outliers	60.488	33.6489	68.4764	121.778
10	D11	Outliers	60.488	23.0779	54.1937	96.378
10	D12	Outliers	60.488	35.7042	55.698	99.0533
10	E01	MCF7-10k GST	60.488	31.1887	-3.94931	-7.02346
10	E02	MCF7-10k GST	60.488	16.3378	13.4913	23.993
10	E03	MCF7-10k GST	60.488	21.3155	14.9332	26.5572
10	E04	MCF7-10k GST	60.488	28.7681	22.4947	40.0045
10	E05	MCF7-15k GST	60.488	12.5746	39.0675	69.4776
10	E06	MCF7-15k GST	60.488	49.808	24.1044	42.8672
10	E07	MCF7-15k GST	60.488	52.6565	34.2694	60.9447
10	E08	MCF7-15k GST	60.488	39.9919	26.215	46.6208
10	E09	MCF7-20k GST	60.488	56.1862	34.7088	61.7261
10	E10	MCF7-20k GST	60.488	51.2399	31.9155	56.7586
10	E11	MCF7-20k GST	60.488	52.0456	46.3288	82.3912
10	E12	MCF7-20k GST	60.488	44.6791	38.8938	69.1687
10	F01	MCF7-10k GST	60.488	35.8489	5.62936	10.0112
10	F02	MCF7-10k GST	60.488	30.07	25.5768	45.4857
10	F03	MCF7-10k GST	60.488	22.877	13.2299	23.5281
10	F04	MCF7-10k GST	60.488	31.7255	29.7457	52.8998
10	F05	MCF7-15k GST	60.488	43.8278	41.7548	74.2568
10	F06	MCF7-15k GST	60.488	40.7137	33.5637	59.6896
10	F07	MCF7-15k GST	60.488	52.4205	38.1879	67.9134
10	F08	MCF7-15k GST	60.488	49.1406	39.9582	71.0617
10	F09	MCF7-20k GST	60.488	34.5338	36.7095	65.2842
10	F10	MCF7-20k GST	60.488	46.9689	27.7724	49.3905
10	F11	MCF7-20k GST	60.488	51.9594	29.1931	51.9171
10	F12	MCF7-20k GST	60.488	70.0152	10.8926	19.3714
10	G01	MCF7-10k GST	60.488	48.8393	10.2438	18.2176
10	G02	MCF7-10k GST	60.488	35.7549	7.47907	13.3008
10	G03	MCF7-10k GST	60.488	28.7196	18.4572	32.8242
10	G04	MCF7-10k GST	60.488	41.9722	33.4378	59.4657
10	G05	MCF7-15k GST	60.488	24.1242	30.5201	54.2769
10	G06	MCF7-15k GST	60.488	55.9332	47.9832	85.3334
10	G07	MCF7-15k GST	60.488	42.2212	21.0866	37.5004
10	G08	MCF7-15k GST	60.488	37.0966	31.5904	56.1803
10	G09	MCF7-20k GST	60.488	41.2687	31.8723	56.6818
10	G10	MCF7-20k GST	60.488	43.1825	32.927	58.5574
10	G11	MCF7-20k GST	60.488	34.5206	31.7338	56.4354
10	G12	MCF7-20k GST	60.488	43.6933	27.24	48.4436
10	H01	Background	60.488	0	0	0
10	H02	Unassigned	60.488	5.74677	-4.15067	-7.38156
10	H03	Unassigned	60.488	0.917354	-3.96909	-7.05864
10	H04	Unassigned	60.488	1.8282	-2.50917	-4.4623
10	H05	Unassigned	60.488	3.16636	-7.34453	-13.0615
10	H06	Unassigned	60.488	-7.07821	-4.24844	-7.55543
10	H07	Unassigned	60.488	-4.97336	-9.09559	-16.1756
10	H08	Unassigned	60.488	-3.17706	-6.64874	-11.8241
10	H09	Unassigned	60.488	-7.18179	-8.63818	-15.3621
10	H10	Unassigned	60.488	-6.25213	-13.5129	-24.0313
10	H11	Unassigned	60.488	-2.83821	-9.42829	-16.7673
10	H12	Background	60.488	0	0	0
11	A01	Background	67.0614	0	0	0
11	A02	Unassigned	67.0614	6.79001	-1.03065	-1.8329
11	A03	Unassigned	67.0614	-11.2477	4.52302	8.04374
11	A04	Unassigned	67.0614	8.60128	0.626578	1.11431
11	A05	Unassigned	67.0614	1.10682	4.65202	8.27316
11	A06	Unassigned	67.0614	4.30904	0.23008	0.409174
11	A07	Unassigned	67.0614	-0.511182	3.55442	6.32119
11	A08	Unassigned	67.0614	1.48841	0.86506	1.53842
11	A09	Unassigned	67.0614	-4.7087	3.6362	6.46663
11	A10	Unassigned	67.0614	0.815848	2.04879	3.64357
11	A11	Unassigned	67.0614	0.538549	0.417366	0.742244
11	A12	Background	67.0614	0	0	0
11	B01	Outliers	67.0614	14.8068	32.0807	57.0524
11	B02	Outliers	67.0614	21.0251	45.3496	80.6498
11	B03	Outliers	67.0614	0.985434	45.8349	81.5128
11	B04	Outliers	67.0614	15.7611	49.5563	88.131
11	B05	Outliers	67.0614	26.083	75.3524	134.007
11	B06	Outliers	67.0614	23.1442	70.5335	125.437
11	B07	Outliers	67.0614	28.1799	77.1361	137.179
11	B08	Outliers	67.0614	26.2617	77.5802	137.969
11	B09	Outliers	67.0614	38.7584	93.0165	165.421
11	B10	Outliers	67.0614	35.5317	91.4765	162.682
11	B11	Outliers	67.0614	31.4731	69.8765	124.268
11	B12	Outliers	67.0614	37.9347	76.7215	136.442
11	C01	Outliers	67.0614	19.5469	35.7865	63.6427
11	C02	Outliers	67.0614	19.2329	34.8398	61.9591
11	C03	Outliers	67.0614	16.7787	53.3348	94.8505
11	C04	Outliers	67.0614	-1.88691	67.6901	120.38
11	C05	Outliers	67.0614	13.0826	66.0849	117.525
11	C06	Outliers	67.0614	16.9357	78.5767	139.741
11	C07	Outliers	67.0614	25.2204	81.6306	145.172
11	C08	Outliers	67.0614	29.5869	83.27	148.087
11	C09	Outliers	67.0614	42.4883	88.7349	157.806
11	C10	Outliers	67.0614	28.7903	71.3738	126.931
11	C11	Outliers	67.0614	34.4715	74.9161	133.231
11	C12	Outliers	67.0614	35.9237	68.1818	121.255
11	D01	Outliers	67.0614	11.6701	44.482	79.1068
11	D02	Outliers	67.0614	12.4204	48.7835	86.7567
11	D03	Outliers	67.0614	13.5602	44.4873	79.1161
11	D04	Outliers	67.0614	16.342	40.9439	72.8147
11	D05	Outliers	67.0614	17.8932	63.062	112.149
11	D06	Outliers	67.0614	24.9815	72.4228	128.797
11	D07	Outliers	67.0614	20.2768	74.4913	132.475
11	D08	Outliers	67.0614	20.1363	72.0614	128.154
11	D09	Outliers	67.0614	32.4848	81.323	144.625
11	D10	Outliers	67.0614	31.056	65.295	116.121
11	D11	Outliers	67.0614	20.8974	56.855	101.111
11	D12	Outliers	67.0614	33.6486	53.8244	95.7213
11	E01	MCF7-10k GST	67.0614	49.1998	9.08298	16.1532
11	E02	MCF7-10k GST	67.0614	15.9555	9.07536	16.1396
11	E03	MCF7-10k GST	67.0614	20.7966	12.6141	22.433
11	E04	MCF7-10k GST	67.0614	28.8013	12.6262	22.4544
11	E05	MCF7-15k GST	67.0614	14.7112	23.0337	40.9631
11	E06	MCF7-15k GST	67.0614	48.2233	23.4007	41.6158
11	E07	MCF7-15k GST	67.0614	53.4274	17.4034	30.9502
11	E08	MCF7-15k GST	67.0614	38.1377	16.2396	28.8804
11	E09	MCF7-20k GST	67.0614	52.9243	23.8213	42.3638
11	E10	MCF7-20k GST	67.0614	49.4547	16.4456	29.2468
11	E11	MCF7-20k GST	67.0614	49.609	21.2421	37.7769
11	E12	MCF7-20k GST	67.0614	35.2061	20.8191	37.0246
11	F01	MCF7-10k GST	67.0614	37.1115	0.895598	1.59273
11	F02	MCF7-10k GST	67.0614	29.3061	14.2265	25.3004
11	F03	MCF7-10k GST	67.0614	22.5116	10.8788	19.3469
11	F04	MCF7-10k GST	67.0614	30.9126	15.9395	28.3468
11	F05	MCF7-15k GST	67.0614	41.0673	19.4205	34.5374
11	F06	MCF7-15k GST	67.0614	40.4119	19.4679	34.6217
11	F07	MCF7-15k GST	67.0614	51.1264	19.1965	34.139
11	F08	MCF7-15k GST	67.0614	48.7116	19.2274	34.1939
11	F09	MCF7-20k GST	67.0614	34.5569	23.874	42.4575
11	F10	MCF7-20k GST	67.0614	47.0706	14.2197	25.2883
11	F11	MCF7-20k GST	67.0614	51.7329	15.8169	28.1288
11	F12	MCF7-20k GST	67.0614	71.4542	12.116	21.547
11	G01	MCF7-10k GST	67.0614	50.6357	8.73179	15.5286
11	G02	MCF7-10k GST	67.0614	36.1629	7.39003	13.1424
11	G03	MCF7-10k GST	67.0614	27.7617	10.1182	17.9943
11	G04	MCF7-10k GST	67.0614	40.9128	15.5181	27.5974
11	G05	MCF7-15k GST	67.0614	24.2204	18.424	32.7653
11	G06	MCF7-15k GST	67.0614	54.0639	29.2457	52.0105
11	G07	MCF7-15k GST	67.0614	39.8631	13.0477	23.2041
11	G08	MCF7-15k GST	67.0614	35.109	19.2557	34.2444
11	G09	MCF7-20k GST	67.0614	41.1957	16.8629	29.9889
11	G10	MCF7-20k GST	67.0614	41.8237	15.7544	28.0176
11	G11	MCF7-20k GST	67.0614	34.9975	16.8715	30.0042
11	G12	MCF7-20k GST	67.0614	42.9675	14.6304	26.0186
11	H01	Background	67.0614	0	0	0
11	H02	Unassigned	67.0614	6.86803	-0.686549	-1.22096
11	H03	Unassigned	67.0614	1.2063	-1.73447	-3.08458
11	H04	Unassigned	67.0614	2.83773	-1.05712	-1.87998
11	H05	Unassigned	67.0614	4.56277	-3.13567	-5.57647
11	H06	Unassigned	67.0614	-3.40233	1.64777	2.9304
11	H07	Unassigned	67.0614	-1.63561	-3.26057	-5.79859
11	H08	Unassigned	67.0614	-2.22988	-0.836415	-1.48748
11	H09	Unassigned	67.0614	-5.59406	-3.2685	-5.8127
11	H10	Unassigned	67.0614	-2.50869	-2.46479	-4.38337
11	H11	Unassigned	67.0614	-0.991256	-3.72628	-6.62682
11	H12	Background	67.0614	0	0	0
12	A01	Background	73.6254	0	0	0
12	A02	Unassigned	73.6254	6.89242	-2.85919	-5.08478
12	A03	Unassigned	73.6254	-10.7485	3.84093	6.83072
12	A04	Unassigned	73.6254	8.32165	-0.451217	-0.802445
12	A05	Unassigned	73.6254	1.02826	2.23383	3.97264
12	A06	Unassigned	73.6254	3.81822	-1.21953	-2.16881
12	A07	Unassigned	73.6254	-0.790564	2.57703	4.58298
12	A08	Unassigned	73.6254	1.62214	-0.875236	-1.55652
12	A09	Unassigned	73.6254	-4.65738	1.24199	2.20876
12	A10	Unassigned	73.6254	0.144866	0.443516	0.788749
12	A11	Unassigned	73.6254	1.40454	-0.931136	-1.65593
12	A12	Background	73.6254	0	0	0
12	B01	Outliers	73.6254	12.8681	28.6655	50.9788
12	B02	Outliers	73.6254	20.4303	43.5858	77.5129
12	B03	Outliers	73.6254	0.281885	44.7198	79.5296
12	B04	Outliers	73.6254	17.4105	48.3064	85.908
12	B05	Outliers	73.6254	25.7623	75.3506	134.003
12	B06	Outliers	73.6254	21.59	69.2592	123.171
12	B07	Outliers	73.6254	27.1472	75.1496	133.646
12	B08	Outliers	73.6254	25.9115	78.0733	138.846
12	B09	Outliers	73.6254	37.4762	92.2005	163.969
12	B10	Outliers	73.6254	33.1471	90.5402	161.017
12	B11	Outliers	73.6254	30.9506	66.3853	118.06
12	B12	Outliers	73.6254	37.2073	75.3404	133.985
12	C01	Outliers	73.6254	13.6037	25.3927	45.1584
12	C02	Outliers	73.6254	18.153	32.5691	57.921
12	C03	Outliers	73.6254	16.5994	52.7949	93.8905
12	C04	Outliers	73.6254	-3.69567	68.1499	121.198
12	C05	Outliers	73.6254	12.8927	66.4132	118.109
12	C06	Outliers	73.6254	16.53	78.0586	138.819
12	C07	Outliers	73.6254	24.9085	81.1678	144.349
12	C08	Outliers	73.6254	29.5388	83.024	147.65
12	C09	Outliers	73.6254	42.6196	88.0326	156.557
12	C10	Outliers	73.6254	25.9029	69.9771	124.447
12	C11	Outliers	73.6254	32.2788	74.1083	131.794
12	C12	Outliers	73.6254	34.5159	64.392	114.515
12	D01	Outliers	73.6254	11.8693	42.1659	74.9879
12	D02	Outliers	73.6254	12.1751	48.0859	85.516
12	D03	Outliers	73.6254	13.6286	44.3875	78.9387
12	D04	Outliers	73.6254	15.4359	40.4635	71.9603
12	D05	Outliers	73.6254	17.0976	62.4362	111.037
12	D06	Outliers	73.6254	24.6929	71.3158	126.828
12	D07	Outliers	73.6254	19.2793	75.0415	133.454
12	D08	Outliers	73.6254	20.5823	71.1813	126.589
12	D09	Outliers	73.6254	31.4022	80.6389	143.408
12	D10	Outliers	73.6254	29.7242	64.1784	114.135
12	D11	Outliers	73.6254	19.7682	53.0751	94.3888
12	D12	Outliers	73.6254	30.7708	46.5188	82.7291
12	E01	MCF7-10k GST	73.6254	45.0297	9.40845	16.732
12	E02	MCF7-10k GST	73.6254	16.5527	8.26111	14.6916
12	E03	MCF7-10k GST	73.6254	21.9539	12.3971	22.0471
12	E04	MCF7-10k GST	73.6254	29.5108	11.0125	19.5846
12	E05	MCF7-15k GST	73.6254	16.4185	18.7283	33.3064
12	E06	MCF7-15k GST	73.6254	47.9757	20.7641	36.927
12	E07	MCF7-15k GST	73.6254	53.5379	15.2699	27.156
12	E08	MCF7-15k GST	73.6254	36.0114	14.0976	25.0711
12	E09	MCF7-20k GST	73.6254	52.5406	19.2229	34.186
12	E10	MCF7-20k GST	73.6254	49.0307	14.4118	25.63
12	E11	MCF7-20k GST	73.6254	50.8171	16.8747	30.0099
12	E12	MCF7-20k GST	73.6254	36.6547	16.29	28.9701
12	F01	MCF7-10k GST	73.6254	37.4229	0.478363	0.850721
12	F02	MCF7-10k GST	73.6254	29.8985	12.2789	21.8367
12	F03	MCF7-10k GST	73.6254	23.205	11.2617	20.0277
12	F04	MCF7-10k GST	73.6254	31.6595	12.6311	22.4631
12	F05	MCF7-15k GST	73.6254	41.36	12.8926	22.9281
12	F06	MCF7-15k GST	73.6254	43.1559	16.5642	29.4578
12	F07	MCF7-15k GST	73.6254	51.7654	15.1081	26.8682
12	F08	MCF7-15k GST	73.6254	50.7244	15.6828	27.8902
12	F09	MCF7-20k GST	73.6254	34.3257	20.2487	36.0103
12	F10	MCF7-20k GST	73.6254	45.9568	11.7368	20.8727
12	F11	MCF7-20k GST	73.6254	53.1315	13.3126	23.6751
12	F12	MCF7-20k GST	73.6254	67.4141	11.1515	19.8318
12	G01	MCF7-10k GST	73.6254	49.183	10.0763	17.9197
12	G02	MCF7-10k GST	73.6254	35.4444	6.74591	11.9969
12	G03	MCF7-10k GST	73.6254	27.4467	8.97795	15.9664
12	G04	MCF7-10k GST	73.6254	42.0573	11.3612	20.2047
12	G05	MCF7-15k GST	73.6254	23.9208	15.3854	27.3615
12	G06	MCF7-15k GST	73.6254	55.881	22.7559	40.4691
12	G07	MCF7-15k GST	73.6254	40.2851	10.5182	18.7056
12	G08	MCF7-15k GST	73.6254	35.0237	18.136	32.2531
12	G09	MCF7-20k GST	73.6254	41.0383	14.0817	25.0428
12	G10	MCF7-20k GST	73.6254	41.3487	12.2108	21.7157
12	G11	MCF7-20k GST	73.6254	35.8044	13.8087	24.5574
12	G12	MCF7-20k GST	73.6254	45.3492	12.1755	21.6529
12	H01	Background	73.6254	0	0	0
12	H02	Unassigned	73.6254	6.05262	1.50324	2.67337
12	H03	Unassigned	73.6254	-0.455385	-0.00353878	-0.00629337
12	H04	Unassigned	73.6254	3.4869	0.214209	0.380949
12	H05	Unassigned	73.6254	5.27158	-0.82371	-1.46489
12	H06	Unassigned	73.6254	-3.24843	2.57636	4.5818
12	H07	Unassigned	73.6254	-0.741935	-1.9255	-3.42431
12	H08	Unassigned	73.6254	-1.53882	-0.0011861	-0.00210936
12	H09	Unassigned	73.6254	-5.7008	-1.961	-3.48745
12	H10	Unassigned	73.6254	-1.74019	-0.506162	-0.900158
12	H11	Unassigned	73.6254	-0.142655	-2.178	-3.87336
12	H12	Background	73.6254	0	0	0

## Sheet: Summary Printout
	Seahorse XF Glycolysis Stress Test Summary Report
	Assay Name:	2023.11.6KK .XF Glycolysis Stress Test	Last Run:	2023/1/3 19:02
	Project Name:
	Principal Investigator:
													File Name:
													For GST Report Generator.xlsx
													Report Generator Version: 3.0.6
		2023.11.6KK .XF Glycolysis Stress Test		2023/1/3 19:02
				For GST Report Generator.xlsx
				7/23/2014 8:21:22 AM
																										Time (min)	Control	Experimental	Unselected		Time (min)	Control	Experimental	Unselected		Time (min)	Control	Experimental	Unselected		Time (min)	Control	Experimental	Unselected		Time (min)	Control	Experimental	Unselected
																										1.37878	21.2113	15.3381	0		1.37878	12.9493	4.34175	0		1.37878	6.47463	2.17087	0		1.37878	139.41	65.6899	0		1.37878	27.5933	25.1762	0
																										9.96452	22.0228	13.9262	0		9.96452	15.3432	9.47953	0		9.96452	7.67162	4.73976	0		9.96452	133.525	60.5723	0		9.96452	25.4512	24.3751	0
																										18.5196	23.6178	13.0633	0		18.5196	18.3817	12.3607	0		18.5196	9.19087	6.18035	0		18.5196	128.704	57.0342	0		18.5196	25.079	24.0627	0
																										27.1963	23.5941	14.0689	0		27.1963	9.36572	4.86926	0		27.1963	4.68286	2.43463	0		27.1963	120.882	49.3718	0		27.1963	18.6554	20.0959	0
																										35.754	33.8711	16.7568	0		35.754	12.1229	5.81109	0		35.754	6.06145	2.90555	0		35.754	135.105	58.2426	0		35.754	22.9742	21.184	0
																										44.3511	41.2249	20.1779	0		44.3511	13.0997	6.51346	0		44.3511	6.54986	3.25673	0		44.3511	141.339	60.5602	0		44.3511	22.8319	20.4001	0
																										53.0006	49.2762	26.2593	0		53.0006	16.189	8.3643	0		53.0006	8.0945	4.18215	0		53.0006	140.068	57.7667	0		53.0006	22.3084	20.1502	0
																										61.5561	48.1685	26.5648	0		61.5561	17.9438	7.02646	0		61.5561	8.97191	3.51323	0		61.5561	140.767	59.3303	0		61.5561	25.5602	21.5384	0
																										70.1083	44.3507	26.6455	0		70.1083	20.7462	6.87297	0		70.1083	10.3731	3.43648	0		70.1083	139.128	59.7077	0		70.1083	23.5293	22.9243	0
																										78.8072	34.785	15.827	0		78.8072	17.4244	4.92462	0		78.8072	8.71222	2.46231	0		78.8072	132.727	51.8575	0		78.8072	18.451	19.645	0
																										87.3648	37.2764	17.9655	0		87.3648	16.6202	5.35355	0		87.3648	8.3101	2.67677	0		87.3648	136.88	56.5445	0		87.3648	19.2807	21.1981	0
																										95.9313	34.0283	18.5216	0		95.9313	17.2362	5.5339	0		95.9313	8.61811	2.76695	0		95.9313	134.301	57.0999	0		95.9313	19.1573	22.0283	0
	TRUE
	FALSE
	FALSE
	TRUE
	FALSE
	TRUE
	8
																										1
																										2
																										3
																										4
																										5
																										6
																										7
																										8
																										9
																										10
																										11
																										12
																										Group Name: Control
																										Measurement	Time (min)	OCR (pmol/min)	StDev	ECAR (mpH/min)	StDev
																										1	1.37878	139.41	27.5933	21.2113	12.9493
																										2	9.96452	133.525	25.4512	22.0228	15.3432
																										3	18.5196	128.704	25.079	23.6178	18.3817
																										4	27.1963	120.882	18.6554	23.5941	9.36572
																										5	35.754	135.105	22.9742	33.8711	12.1229
																										6	44.3511	141.339	22.8319	41.2249	13.0997
																										7	53.0006	140.068	22.3084	49.2762	16.189
																										8	61.5561	140.767	25.5602	48.1685	17.9438
																										9	70.1083	139.128	23.5293	44.3507	20.7462
																										10	78.8072	132.727	18.451	34.785	17.4244
																										11	87.3648	136.88	19.2807	37.2764	16.6202
																										12	95.9313	134.301	19.1573	34.0283	17.2362
																										Group Name: Experimental
																										Measurement	Time (min)	OCR (pmol/min)	StDev	ECAR (mpH/min)	StDev
																										1	1.37878	65.6899	25.1762	15.3381	4.34175
																										2	9.96452	60.5723	24.3751	13.9262	9.47953
																										3	18.5196	57.0342	24.0627	13.0633	12.3607
																										4	27.1963	49.3718	20.0959	14.0689	4.86926
																										5	35.754	58.2426	21.184	16.7568	5.81109
																										6	44.3511	60.5602	20.4001	20.1779	6.51346
																										7	53.0006	57.7667	20.1502	26.2593	8.3643
																										8	61.5561	59.3303	21.5384	26.5648	7.02646
																										9	70.1083	59.7077	22.9243	26.6455	6.87297
																										10	78.8072	51.8575	19.645	15.827	4.92462
																										11	87.3648	56.5445	21.1981	17.9655	5.35355
																										12	95.9313	57.0999	22.0283	18.5216	5.5339
															B0009522222B**+457-6+913-3300F+250-2***000A+190-4**+000+0125&
															Z0092908322V
Assay Name	Last Run	Project Name	Plate Barcode	Cartridge Barcode
2023.11.6KK .XF Glycolysis Stress Test	2023/1/3 19:02		Z0092908322V	B0009522222B**+457-6+913-3300F+250-2***000A+190-4**+000+0125&
	Group Name	Assay Wells	Non-Glycolytic Acidification	Glycolysis	Glycolytic Capacity	Glycolytic Reserve	Glycolytic Reserve as a %	Acute Response
	Control	A01	11.2142	30.8293	33.5595	2.73026	1.08856	0
		A04	4.97154	19.4459	25.7544	6.30841	1.32441	0
		B03	35.2643	6.75003	16.7024	9.95237	2.47442	0
		B05	43.0212	13.4032	26.6174	13.2141	1.98589	0
	Group Name	Assay Wells	Non-Glycolytic Acidification	Glycolysis	Glycolytic Capacity	Glycolytic Reserve	Glycolytic Reserve as a %	Acute Response
	Experimental	C01	4.81985	15.1761	20.1207	4.94462	1.32582	0
		C02	14.5684	8.08789	15.955	7.86715	1.97271	0
		C03	29.9498	-3.22387	3.40053	6.6244	-1.0548	0
		D03	2.91508	8.41845	14.8528	6.43432	1.76431	0
File Name

## Sheet: Bar Charts
	Seahorse XF Glycolysis Stress Test Bar Charts

## Sheet: Normalize
	1	2	3	4	5	6
A	1	1	1	1	1	0
B	1	1	1	1	1	0
C	1.5	1.5	1.5	1.5	1.5	0
D	1.5	1.5	1.5	1.5	1.5	0
		Normalization Unit:		protein ug
		Scale Factor:		1

## Sheet: Measures Sheet
	1. Average Assay Parameter Calculations:
		Control		Experimental
	Parameter	Average	StDev	Average	StDev
	Non-Glycolytic Acidification	23.6178	12.2838	13.0633	6.23487
	Glycolysis	17.6071	6.40217	6.86463	5.53867
	Glycolytic Capacity	25.6584	2.88648	13.5823	3.70242
	Glycolytic Reserve	8.05129	4.53211	6.46762	1.19776
	Glycolytic Reserve (%)	1.71832	0.631148	1.00201	1.39746
	Acute Response
	2. OCR Kinetic Graph:
	3. Kinetic Rate Data:
	Group Name: Control
	Measurement	Time (min)	OCR (pmol/min)	StDev	ECAR (mpH/min)	StDev
	1	1.37878	139.41	27.5933	21.9613	6.82625
	2	9.96452	133.525	25.4512	22.0228	8.46637
	3	18.5196	128.704	25.079	23.6178	9.87035
	4	27.1963	120.882	18.6554	26.5941	6.22647
	5	35.754	135.105	22.9742	34.3711	9.77303
	6	44.3511	141.339	22.8319	41.7249	9.97895
	7	53.0006	140.068	22.3084	49.2762	8.32662
	8	61.5561	140.767	25.5602	48.1685	10.7221
	9	70.1083	139.128	23.5293	44.3507	13.6937
	10	78.8072	132.727	18.451	34.785	10.5967
	11	87.3648	136.88	19.2807	35.5264	8.3899
	12	95.9313	134.301	19.1573	34.0283	9.13377
	Group Name: Experimental
	Measurement	Time (min)	OCR (pmol/min)	StDev	ECAR (mpH/min)	StDev
	1	1.37878	65.6899	25.1762	14.0881	3.23241
	2	9.96452	60.5723	24.3751	13.9262	5.55703
	3	18.5196	57.0342	24.0627	13.0633	7.7001
	4	27.1963	49.3718	20.0959	14.8189	3.48429
	5	35.754	58.2426	21.184	17.5068	4.48675
	6	44.3511	60.5602	20.4001	20.1779	6.51346
	7	53.0006	57.7667	20.1502	26.2593	8.3643
	8	61.5561	59.3303	21.5384	26.5648	7.02646
	9	70.1083	59.7077	22.9243	26.6455	6.87297
	10	78.8072	51.8575	19.645	15.827	4.92462
	11	87.3648	56.5445	21.1981	17.9655	5.35355
	12	95.9313	57.0999	22.0283	18.5216	5.5339

## Sheet: Assay Parameter per Well
	Assay Well Parameter Calculations
	Group Name	Assay Wells	Non-Glycolytic Acidification	Glycolysis	Glycolytic Capacity	Glycolytic Reserve	Glycolytic Reserve as a %	Acute Response
	Control	A01	11.2142	23.8293	28.5595	2.73026	1.08856	0
		A04	14.9715	18.4459	25.7544	6.30841	1.32441	0
		B03	35.2643	14.75	21.7024	9.95237	2.47442	0
		B05	33.0212	13.4032	26.6174	13.2141	1.98589	0
	Group Name	Assay Wells	Non-Glycolytic Acidification	Glycolysis	Glycolytic Capacity	Glycolytic Reserve	Glycolytic Reserve as a %	Acute Response
	Experimental	C01	7.81985	11.1761	17.1207	4.94462	1.32582	0
		C02	12.5684	8.08789	13.955	7.86715	1.97271	0
		C03	21.9498	-1.22387	8.40053	6.6244	-1.0548	0
		D03	9.91508	9.41845	14.8528	6.43432	1.76431	0

## Sheet: Sample Calculations
	Seahorse Glycolysis Stress Test Equations and Example Calculations
	The parameter values and error bars in the Seahorse XF Report Generators represent the average of the individual well calculations
	for each group on the Plate Map.

## Sheet: Project Information
	Project Information
		Assay Name	Last Run	Project Name	Plate Barcode	Cartridge Barcode
		2023.11.6KK .XF Glycolysis Stress Test	2023/1/3 19:02		Z0092908322V	B0009522222B**+457-6+913-3300F+250-2***000A+190-4**+000+0125&
		Plate Map Layout
		1	2	3	4	5	6		Legend:
	A	Control	Control	Control	Control	Control	Background		Unassigned Well	Unselected Well	Assigned Well
	B	Control	Control	Control	Control	Control	Background
	C	Experimental	Experimental	Experimental	Background	Background	Background
	D	Experimental	Experimental	Experimental	Background	Background	Background

[truncated: 10 more sheets: styles, Baselined Rate, Normalized Rate, Rate, Assay Configuration, L-Rate, groups, unselectedwell, Image, Version]
