# Supplementary material for: USP22 as a key regulator of glycolysis pathway in osteosarcoma: insights from bioinformatics and experimental approaches
Source: PeerJ. 2024 May 20;12:e17397. doi: 10.7717/peerj.17397 (PMC11114114; doi:10.7717/peerj.17397)
Supplement: Supplemental Information 18 [file peerj-12-17397-s018.xlsx]

## Sheet: Sheet1
Group	β-actin CT-1	β-actin CT-2	β-actin CT-3	β-actin AVR-CT	USP22 CT-1	USP22 CT-2	USP22 CT-3	USP22 AVR-CT	△CT	USP22 expression level（2^-△CT）	△△CT	USP22 expression level(2^-△△CT)			AVR		Normalization			AVR	SD
NC-1	18.08	17.89	17.71	17.8933	26.47	26.59	26.77	26.61	8.71667	0.00237696	0	1		NC	1.16188		0.860675			1	0.132835
NC-2	18.19	17.89	17.56	17.88	26.02	26.2	26.41	26.21	8.33	0.00310756	-0.386667	1.30737					1.12522
NC-3	18.32	17.89	18.09	18.1	26.82	26.94	25.98	26.58	8.48	0.00280069	-0.236667	1.17827					1.01411
SiRNA-NC-1	19.57	18.41	19.12	19.0333	27.55	27.68	26.98	27.4033	8.37	0.00302259	-0.346667	1.27162		siNC	1.1042		1.09445			0.95036	0.135458
SiRNA-NC-2	19.28	19.28	19.06	19.2067	28.86	27.21	27.36	27.81	8.60333	0.00257122	-0.113333	1.08172					0.931013
SiRNA-NC-3	19.37	19.3	18.67	19.1133	27.68	28.96	27.03	27.89	8.77667	0.00228013	0.06	0.959264					0.825615
SIRNA-USP22-1	18.71	18.91	18.29	18.6367	30.51	30.47	29.6	30.1933	11.5567	0.000331968	2.84	0.139661		siUSP22	0.140794		0.120203			0.121178	0.0148487
SIRNA-USP22-2	18.75	18.2	18.23	18.3933	29.34	30.84	30.18	30.12	11.7267	0.000295068	3.01	0.124137					0.106841
SIRNA-USP22-3	18.51	18.02	18.15	18.2267	30.17	29.16	29.47	29.6	11.3733	0.000376952	2.65667	0.158586					0.136491
Group	β-actin CT-1	β-actin CT-2	β-actin CT-3	β-actin AVR-CT	HK2 CT-1	HK2 CT-2	HK2 CT-3	HK2 AVR-CT	△CT	HK2 expression level（2^-△CT）	△△CT	HK2 expression level(2^-△△CT)			AVR		Normalization			AVR	SD
SiRNA-NC-1	19.57	18.41	19.12	19.0333	22.05	22.22	22.87	22.38	3.34667	0.0982999	0	1		siNC	1.10977		0.901088			1	0.110759
SiRNA-NC-2	19.28	19.28	19.06	19.2067	21.95	22.2	22.57	22.24	3.03333	0.122145	-0.313333	1.24258					1.11967
SiRNA-NC-3	19.37	19.3	18.67	19.1133	22.19	22.82	22.01	22.34	3.22667	0.106826	-0.12	1.08673					0.979243
SIRNA-USP22-1	18.71	18.91	18.29	18.6367	23.54	23.35	24.15	23.68	5.04333	0.0303253	1.69667	0.308498		siUSP22	0.268013		0.277984			0.241503	0.0370198
SIRNA-USP22-2	18.75	18.2	18.23	18.3933	23.17	23.37	24.36	23.6333	5.24	0.0264608	1.89333	0.269184					0.242559
SIRNA-USP22-3	18.51	18.02	18.15	18.2267	23.29	24.09	23.77	23.7167	5.49	0.0222508	2.14333	0.226356					0.203967
Group	β-actin CT-1	β-actin CT-2	β-actin CT-3	β-actin AVR-CT	PKM2 CT-1	PKM2 CT-2	PKM2 CT-3	PKM2 AVR-CT	△CT	PKM2 expression level（2^-△CT）	△△CT	PKM2 expression level(2^-△△CT)			AVR		Normalization			AVR	SD
SiRNA-NC-1	19.57	18.41	19.12	19.0333	24.22	24.08	24.08	24.1267	5.09333	0.0292923	0	1		siNC	1.12904		0.885711			1	0.133881
SiRNA-NC-2	19.28	19.28	19.06	19.2067	23.81	24.78	23.19	23.9267	4.72	0.0379436	-0.373333	1.29534					1.1473
SiRNA-NC-3	19.37	19.3	18.67	19.1133	24.02	24.08	24.14	24.08	4.96667	0.0319804	-0.126667	1.09177					0.966991
SIRNA-USP22-1	18.71	18.91	18.29	18.6367	25.26	24.74	25.67	25.2233	6.58667	0.0104044	1.49333	0.355191		Transfection	0.44614		0.314596			0.395151	0.0708865
SIRNA-USP22-2	18.75	18.2	18.23	18.3933	25.36	24.12	24.18	24.5533	6.16	0.0139848	1.06667	0.477421					0.422857
SIRNA-USP22-3	18.51	18.02	18.15	18.2267	24.27	24.33	24.31	24.3033	6.07667	0.0148163	0.983333	0.50581					0.448001
Group	β-actin CT-1	β-actin CT-2	β-actin CT-3	β-actin AVR-CT	GLUT1 CT-1	GLUT1 CT-2	GLUT1 CT-3	GLUT1 AVR-CT	△CT	GLUT1 expression level（2^-△CT）	△△CT	GLUT1 expression level(2^-△△CT)			AVR		Normalization			AVR	SD
SiRNA-NC-1	19.57	18.41	19.12	19.0333	25.54	25.16	25.18	25.2933	6.26	0.0130482	0	1		siNC	1.09443		0.913718			1	0.0852083
SiRNA-NC-2	19.28	19.28	19.06	19.2067	25.74	25.2	25.06	25.3333	6.12667	0.0143116	-0.133333	1.09682					1.00219
SiRNA-NC-3	19.37	19.3	18.67	19.1133	25.11	24.93	25.34	25.1267	6.01333	0.0154813	-0.246667	1.18646					1.08409
SIRNA-USP22-1	18.71	18.91	18.29	18.6367	26.82	25.19	25.14	25.7167	7.08	0.00739108	0.82	0.566442		siUSP22	0.530807		0.517568			0.485008	0.0941671
SIRNA-USP22-2	18.75	18.2	18.23	18.3933	25.74	25.2	26.83	25.9233	7.53	0.00541058	1.27	0.41466					0.378882
SIRNA-USP22-3	18.51	18.02	18.15	18.2267	25.22	25.19	25.18	25.1967	6.97	0.00797666	0.71	0.61132					0.558574
Group	β-actin CT-1	β-actin CT-2	β-actin CT-3	β-actin AVR-CT	HK2 CT-1	HK2 CT-2	HK2 CT-3	HK2 AVR-CT	△CT	HK2 expression level（2^-△CT）	△△CT	HK2 expression level(2^-△△CT)			AVR		Normalization			AVR	SD
SiRNA-NC-1	18.78	18.74	18.37	18.63	22.05	22.22	22.87	22.38	3.75	0.0743254	0	1		siNC	1.08692		0.920032			1	0.0707389
SiRNA-NC-2	18.94	18.74	18.38	18.6867	21.95	22.2	22.57	22.24	3.55333	0.0851805	-0.196667	1.14605					1.0544
SiRNA-NC-3	18.96	18.76	18.52	18.7467	22.19	22.82	22.01	22.34	3.59333	0.0828512	-0.156667	1.11471					1.02557
SIRNA-USP22-1	18.12	17.97	18.29	18.1267	23.54	23.35	24.15	23.68	5.55333	0.0212951	1.80333	0.286512		siUSP22	0.269351		0.2636			0.247812	0.0228097
SIRNA-USP22-2	18.22	18.01	17.92	18.05	23.17	23.37	24.36	23.6333	5.58333	0.0208569	1.83333	0.280616					0.258175
SIRNA-USP22-3	17.69	18.08	17.97	17.9133	23.29	24.09	23.77	23.7167	5.80333	0.017907	2.05333	0.240927					0.22166
