# Supplementary material for: USP22 as a key regulator of glycolysis pathway in osteosarcoma: insights from bioinformatics and experimental approaches
Source: PeerJ. 2024 May 20;12:e17397. doi: 10.7717/peerj.17397 (PMC11114114; doi:10.7717/peerj.17397)
Supplement: Supplemental Information 20 [file peerj-12-17397-s020.xlsx]

## Sheet: Sheet1
		Group 1	Group 2
	USP22-1 gray value	1208319	557197
	USP22-2 gray value	1196408	595630
	USP22-3 gray value	1366320	505027
	β-actin-1 gray value	1532097	1481277
	β-actin-2 gray value	1367560	1486776
	β-actin-3 gray value	1604985	1320274
		Group 1	Group 2
	USP22-1 expression level	0.78867	0.37616
	USP22-2 expression level	0.874849	0.400619
	USP22-3 expression level	0.851298	0.382517
	AVR	0.838272	0.386432
	Normalization	0.940828	0.448732
		1.04363	0.47791
		1.01554	0.456316
	AVR	1	0.460986
	SD	0.0445414	0.0126906
		1	0.460986
		0.0445414	0.0126906
							1	0.0445414
							0.460986	0.0126906
